# Supplementary material for: Self-association of oligothiophenes in isotropic systems
Source: Royal Society of Chemistry journal article supplement (doi:10.1039/c4cp01101e), 2014-01-01
Supplement: c4cp01101e1.pdf [file c4cp01101e1.pdf]

## *Self-association of oligothiophenes in isotropic systems*

# **(Supplementary Information)**

**Carlos F. R. A. C. Lima,<sup>\*a,b</sup> José C. S. Costa,<sup>a</sup> Tiago L. P. Galvão,<sup>a</sup> Hilário R.  
Tavares,<sup>b</sup> Artur M. S. Silva,<sup>b</sup> and Luís M. N. B. F. Santos<sup>\*a</sup>**

<sup>a</sup> CIQ, Departamento de Química e Bioquímica, Faculdade de Ciências da Universidade do Porto,  
P-4169-007 Porto, Portugal.

<sup>b</sup> QOPNA, Department of Chemistry, University of Aveiro, P-3810-193 Aveiro, Portugal.

\* Corresponding authors:

Carlos F. R. A. C. Lima, Luís M. N. B. F. Santos

CIQ, Departamento de Química e Bioquímica, Faculdade de Ciências da Universidade do Porto,  
P-4169-007 Porto, Portugal.

e-mail: [carlos.chemistry@gmail.com](mailto:carlos.chemistry@gmail.com), [lbsantos@fc.up.pt](mailto:lbsantos@fc.up.pt)

### **Contents**

|                                                                 |            |
|-----------------------------------------------------------------|------------|
| <b>Section S1. <sup>1</sup>H NMR dilution experiments .....</b> | <b>S1</b>  |
| <b>Section S2. Computational details .....</b>                  | <b>S29</b> |
| <b>Section S3. Conformational analysis.....</b>                 | <b>S48</b> |

## Section S1. <sup>1</sup>H NMR dilution experiments

### A) Thiophene

**Table S1.** <sup>1</sup>H NMR results for the dissolution studies of thiophene in CDCl<sub>3</sub>.

| NMR tube | [sample] / mol·dm <sup>-3</sup> | δ(H1) / ppm | δ(H2) / ppm |
|----------|---------------------------------|-------------|-------------|
| <b>1</b> | 1.4298                          | 7.3143      | 7.1029      |
|          | 1.1915                          | 7.3188      | 7.1059      |
|          | 1.0213                          | 7.3251      | 7.1108      |
|          | 0.8936                          | 7.3291      | 7.1142      |
|          | 0.7149                          | 7.3357      | 7.1185      |
|          | 0.6499                          | 7.3371      | 7.1197      |
|          | 0.5106                          | 7.3426      | 7.1241      |
| <b>2</b> | 0.9386                          | 7.3259      | 7.1114      |
|          | 0.7822                          | 7.3315      | 7.1156      |
|          | 0.5866                          | 7.3383      | 7.1203      |
| <b>3</b> | 0.4365                          | 7.3430      | 7.1243      |
|          | 0.3274                          | 7.3473      | 7.1274      |
|          | 0.2619                          | 7.3496      | 7.1296      |

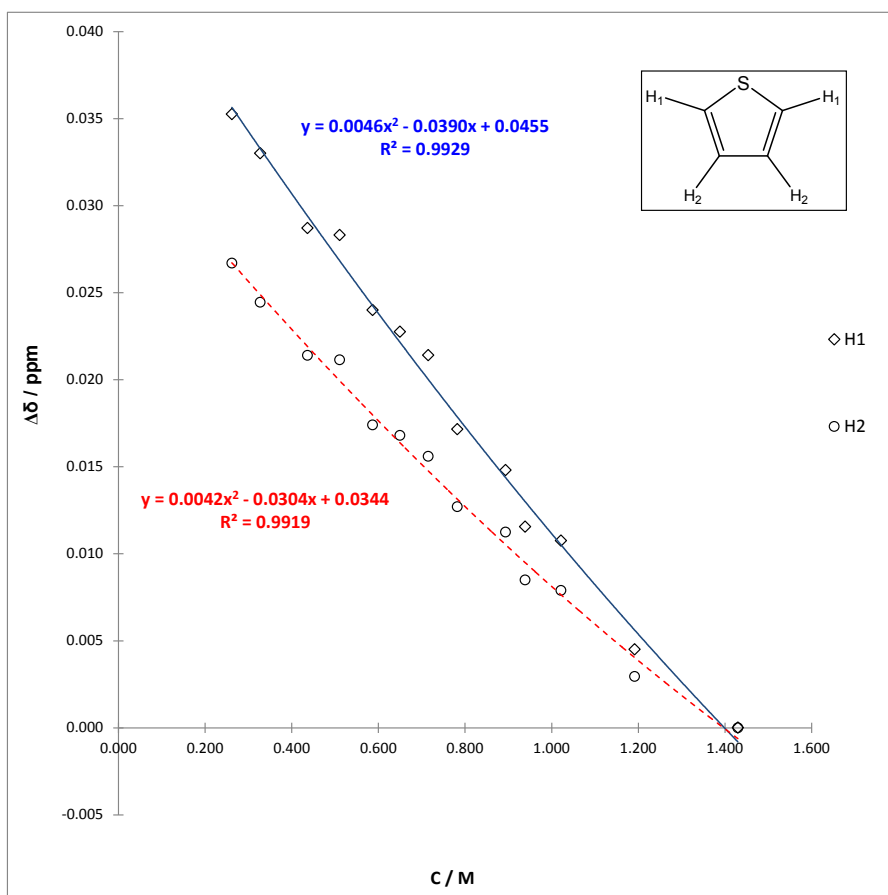

**Figure S1.** Plot of  $\Delta\delta = f(\text{sample concentration})$  for the NMR dissolution studies of thiophene in CDCl<sub>3</sub>.

**Table S2.** Results derived from the least squares fitting of equation 2 (in the manuscript) for the NMR dissolution studies of thiophene in  $\text{CDCl}_3$ .

| Proton | $K_{\text{eq}}$ | $\Sigma(\delta_{\text{calc}} - \delta_{\text{exp}})^2$ |
|--------|-----------------|--------------------------------------------------------|
| H1     | 0.059           | $1.0 \cdot 10^{-5}$                                    |
| H2     | 0.077           | $6.7 \cdot 10^{-6}$                                    |

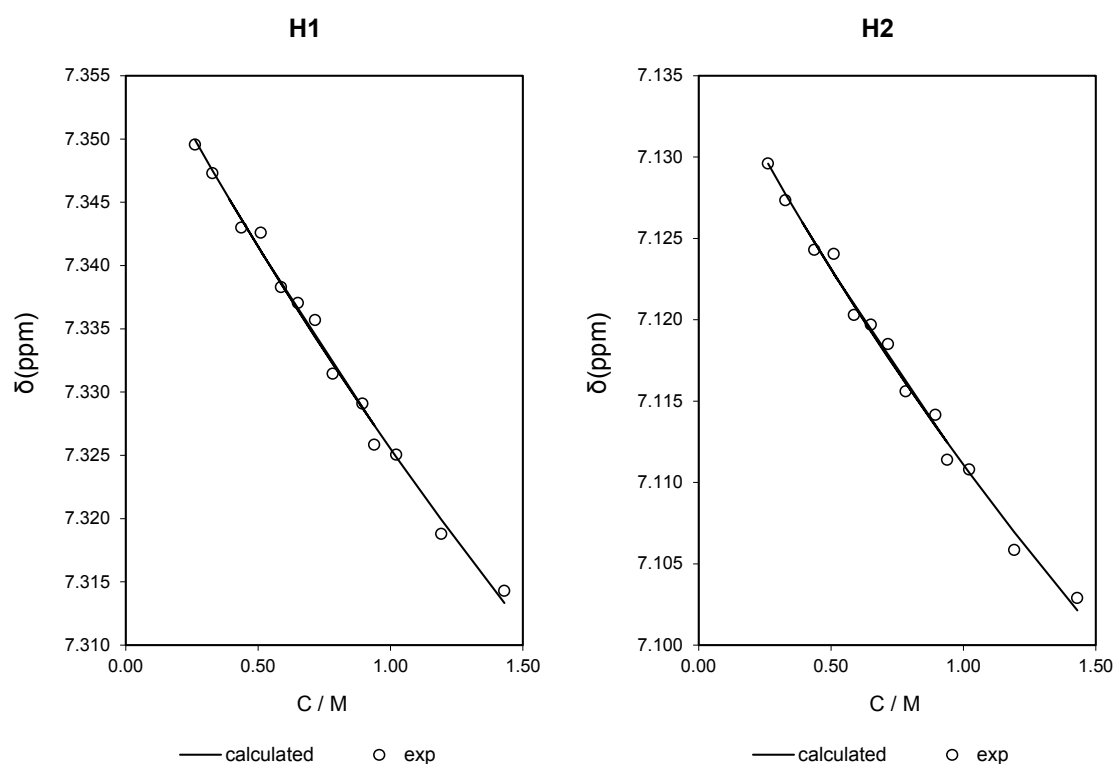

**Figure S2.** Graphical representation of the fitting results of the calculated chemical shifts,  $\delta$ , to the experimental data for the NMR dissolution studies of thiophene in  $\text{CDCl}_3$ .

**Table S3.**  $^1\text{H}$  NMR results for the dissolution studies of thiophene in acetone- $\text{d}_6$ .

| NMR tube | [sample] / $\text{mol}\cdot\text{dm}^{-3}$ | $\delta(\text{H1})$ / ppm |
|----------|--------------------------------------------|---------------------------|
| <b>1</b> | 1.1392                                     | 7.4939                    |
|          | 0.9493                                     | 7.4952                    |
|          | 0.8137                                     | 7.4965                    |
|          | 0.7120                                     | 7.4969                    |
|          | 0.5696                                     | 7.4984                    |
|          | 0.5178                                     | 7.4993                    |
|          | 0.4068                                     | 7.5007                    |
| <b>2</b> | 0.7643                                     | 7.4969                    |
|          | 0.6369                                     | 7.4981                    |
|          | 0.2548                                     | 7.5013                    |
| <b>3</b> | 0.4660                                     | 7.4994                    |
|          | 0.1553                                     | 7.5031                    |

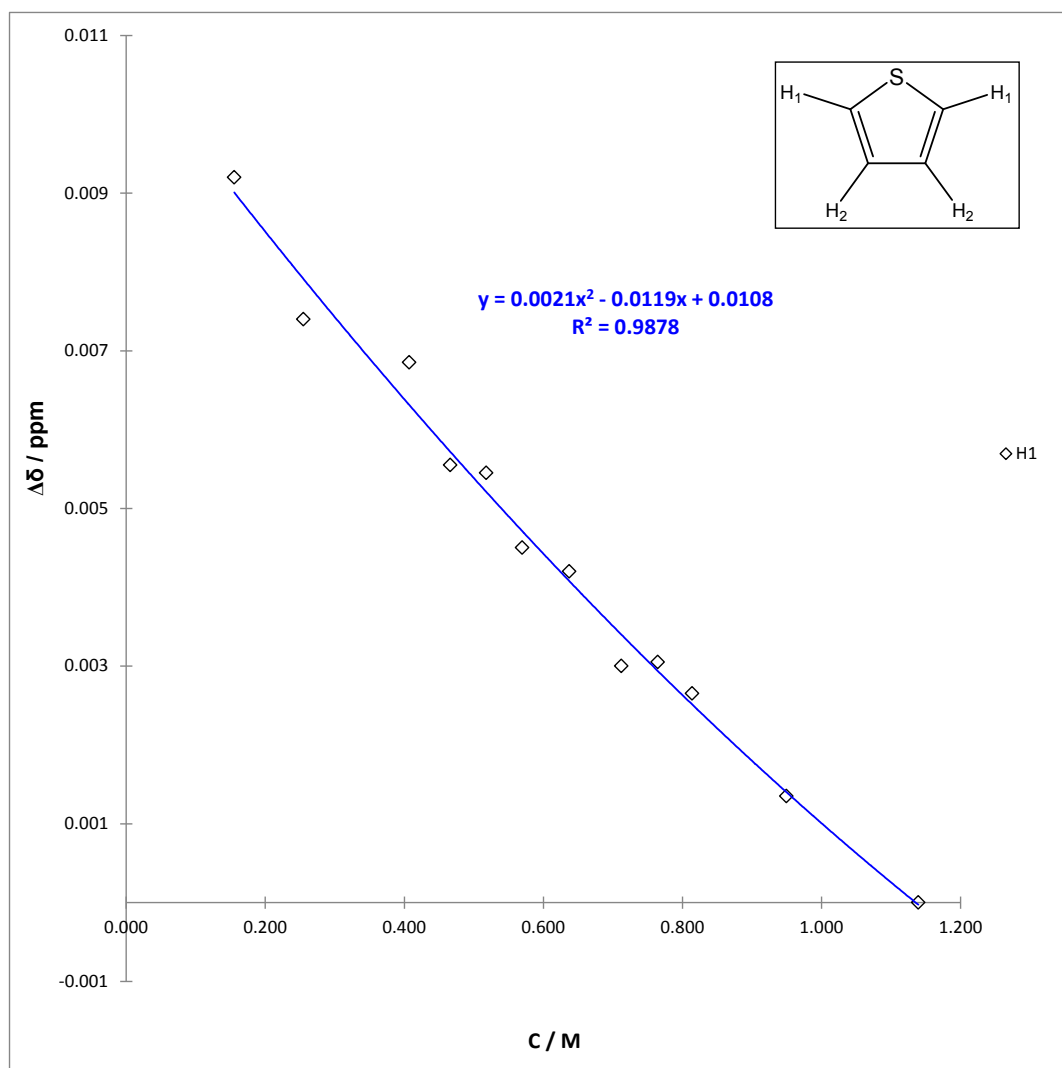

**Figure S3.** Plot of  $\Delta\delta = f(\text{sample concentration})$  for the NMR dissolution studies of thiophene in acetone- $\text{d}_6$ .

**Table S4.** Results derived from the least squares fitting of equation 2 (in the manuscript) for the NMR dissolution studies of thiophene in acetone-d<sub>6</sub>.

| Proton | $K_{eq}$ | $\Sigma(\delta_{calc} - \delta_{exp})^2$ |
|--------|----------|------------------------------------------|
| H1     | 0.107    | $9.3 \cdot 10^{-7}$                      |

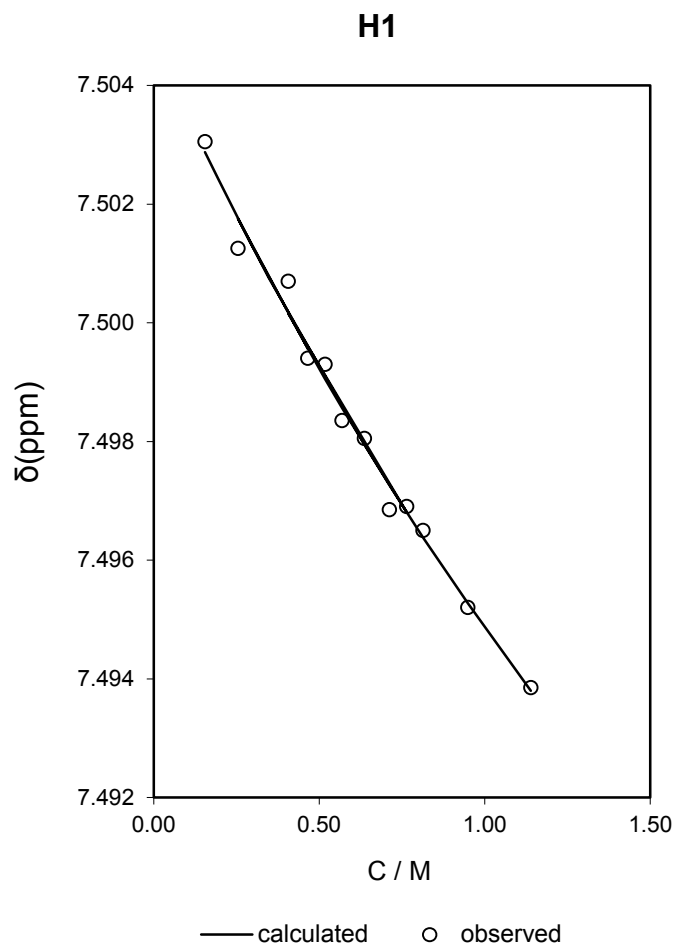

**Figure S4.** Graphical representation of the fitting results of the calculated chemical shifts,  $\delta$ , to the experimental data for the NMR dissolution studies of thiophene in acetone-d<sub>6</sub>.

## B) 2,2'-Bithiophene (22-BT)

**Table S5.**  $^1\text{H}$  NMR results for the dissolution studies of 22-BT in  $\text{CDCl}_3$ .

| NMR tube | [sample] / $\text{mol}\cdot\text{dm}^{-3}$ | $\delta(\text{H1})$ / ppm | $\delta(\text{H2})$ / ppm | $\delta(\text{H3})$ / ppm |
|----------|--------------------------------------------|---------------------------|---------------------------|---------------------------|
| <b>1</b> | 0.6136                                     | 6.9830                    | 7.1722                    | 7.1532                    |
|          | 0.5113                                     | 6.9880                    | 7.1783                    | 7.1566                    |
|          | 0.3835                                     | 6.9949                    | 7.1867                    | 7.1617                    |
|          | 0.2557                                     | 7.0025                    | 7.1958                    | 7.1674                    |
|          | 0.2191                                     | 7.0045                    | 7.1981                    | 7.1690                    |
| <b>2</b> | 0.1185                                     | 7.0096                    | 7.2042                    | 7.1727                    |
|          | 0.0862                                     | 7.0117                    | 7.2067                    | 7.1743                    |
|          | 0.0677                                     | 7.0126                    | 7.2076                    | 7.1748                    |
| <b>3</b> | 0.0657                                     | 7.0122                    | 7.2075                    | 7.1746                    |
|          | 0.0411                                     | 7.0140                    | 7.2093                    | 7.1759                    |
|          | 0.0299                                     | 7.0145                    | 7.2102                    | 7.1763                    |
|          | 0.0219                                     | 7.0154                    | 7.2111                    | 7.1770                    |

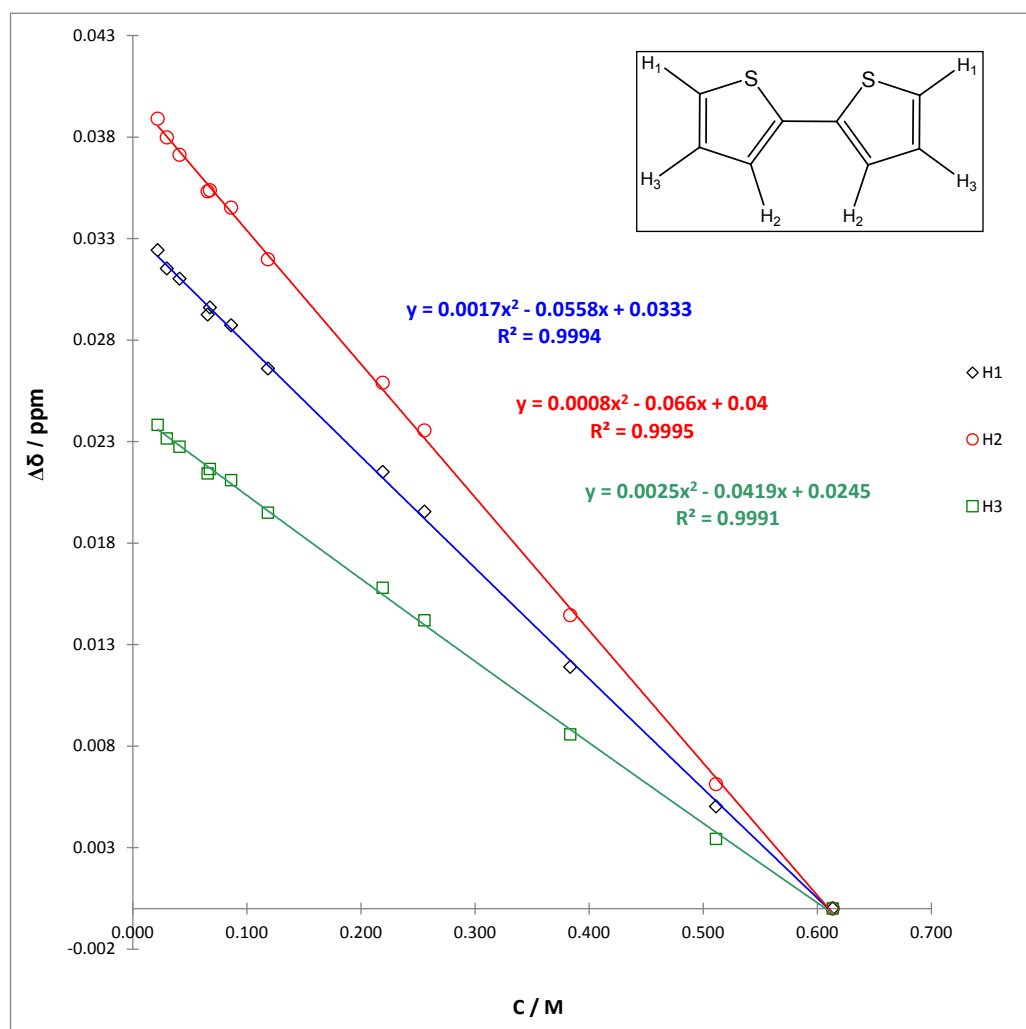

**Figure S5.** Plot of  $\Delta\delta = f(\text{sample concentration})$  for the NMR dissolution studies of 22-BT in  $\text{CDCl}_3$ .

**Table S6.** Results derived from the least squares fitting of equation 2 (in the manuscript) for the NMR dissolution studies of 22-BT in  $\text{CDCl}_3$ .

| Proton | $K_{\text{eq}}$ | $\Sigma(\delta_{\text{calc}} - \delta_{\text{exp}})^2$ |
|--------|-----------------|--------------------------------------------------------|
| H1     | 0.022           | $8.2 \cdot 10^{-7}$                                    |
| H2     | 0.020           | $9.9 \cdot 10^{-7}$                                    |
| H3     | 0.027           | $6.4 \cdot 10^{-7}$                                    |

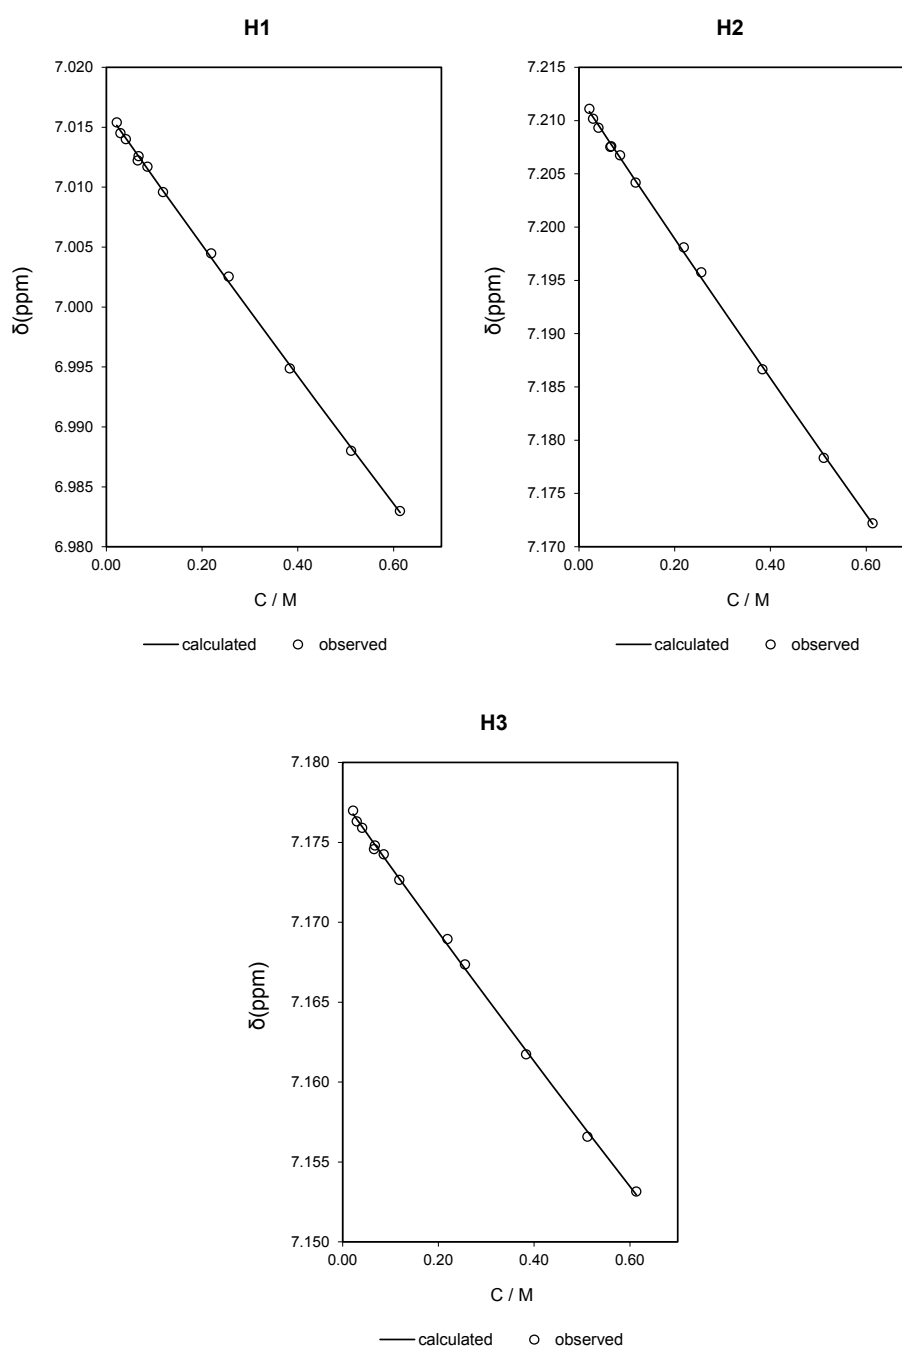

**Figure S6.** Graphical representation of the fitting results of the calculated chemical shifts,  $\delta$ , to the experimental data for the NMR dissolution studies of 22-BT in  $\text{CDCl}_3$ .

**Table S7.**  $^1\text{H}$  NMR results for the dissolution studies of 22-BT in acetone- $\text{d}_6$ .

| NMR tube | [sample] / $\text{mol}\cdot\text{dm}^{-3}$ | $\delta(\text{H1})$ / ppm | $\delta(\text{H2})$ / ppm |
|----------|--------------------------------------------|---------------------------|---------------------------|
| <b>1</b> | 0.7970                                     | 7.0829                    | 7.4033                    |
|          | 0.6832                                     | 7.0843                    | 7.4067                    |
|          | 0.5978                                     | 7.0863                    | 7.4104                    |
|          | 0.5313                                     | 7.0873                    | 7.4130                    |
|          | 0.4347                                     | 7.0885                    | 7.4156                    |
|          | 0.3188                                     | 7.0902                    | 7.4191                    |
| <b>2</b> | 0.2159                                     | 7.0923                    | 7.4236                    |
|          | 0.1080                                     | 7.0939                    | 7.4268                    |
|          | 0.0864                                     | 7.0945                    | 7.4281                    |
| <b>3</b> | 0.0842                                     | 7.0950                    | 7.4289                    |
|          | 0.0561                                     | 7.0948                    | 7.4288                    |
|          | 0.0421                                     | 7.0955                    | 7.4302                    |
|          | 0.0337                                     | 7.0957                    | 7.4305                    |

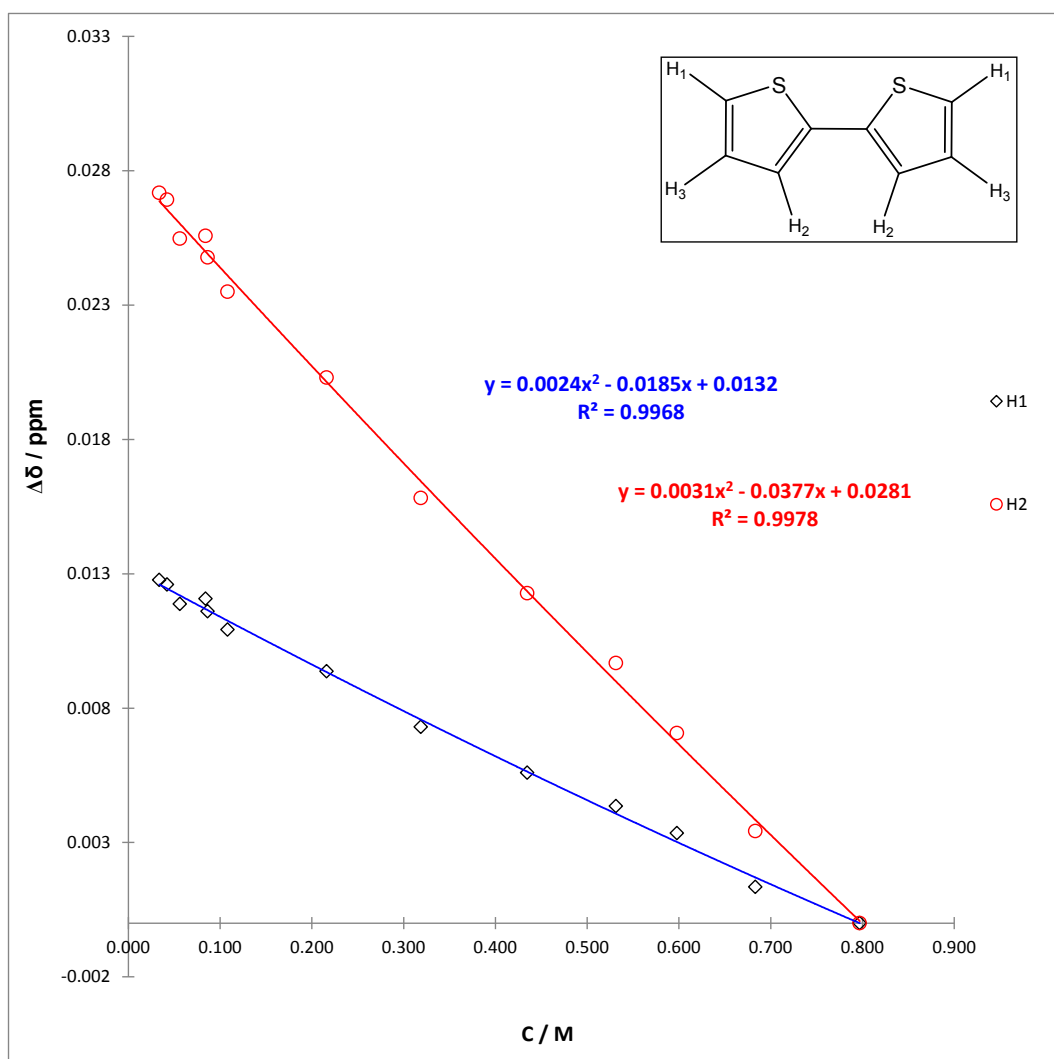

**Figure S7.** Plot of  $\Delta\delta = f(\text{sample concentration})$  for the NMR dissolution studies of 22-BT in acetone- $\text{d}_6$ .



**Table S8.** Results derived from the least squares fitting of equation 2 (in the manuscript) for the NMR dissolution studies of 22-BT in acetone-d<sub>6</sub>.

| Proton | $K_{eq}$ | $\Sigma(\delta_{calc} - \delta_{exp})^2$ |
|--------|----------|------------------------------------------|
| H1     | 0.057    | $7.9 \cdot 10^{-7}$                      |
| H2     | 0.036    | $2.4 \cdot 10^{-6}$                      |

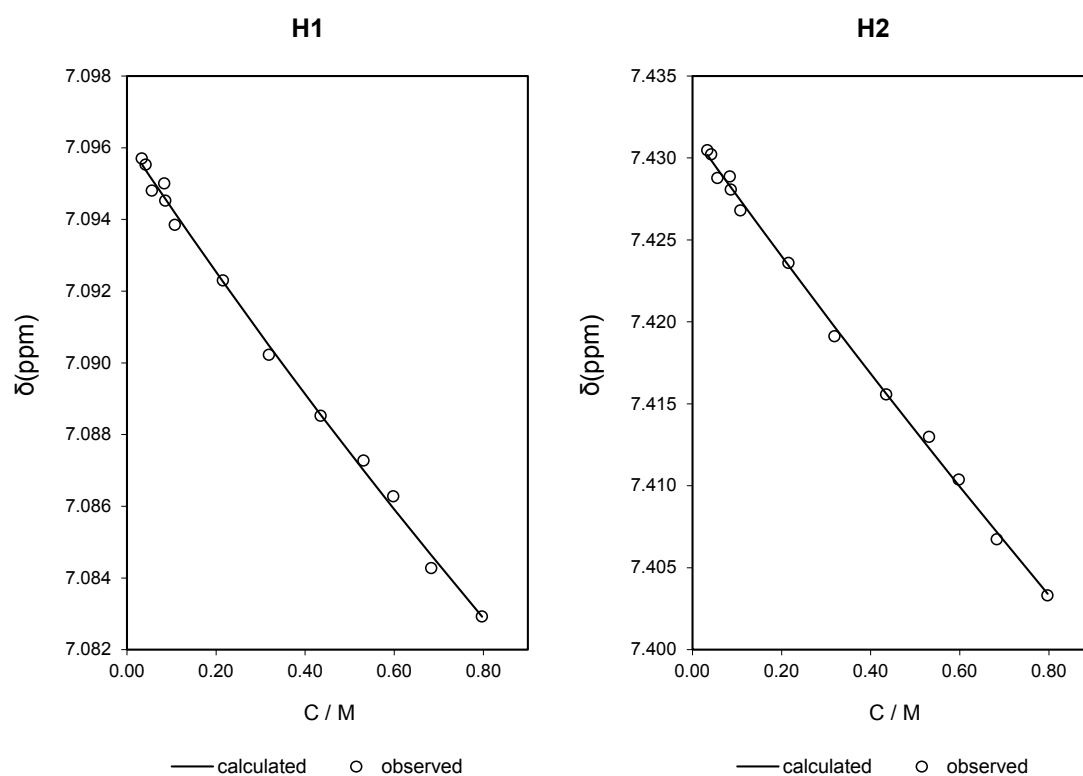

**Figure S8.** Graphical representation of the fitting results of the calculated chemical shifts,  $\delta$ , to the experimental data for the NMR dissolution studies of 22-BT in acetone-d<sub>6</sub>.

**Table S9.**  $^1\text{H}$  NMR results for the dissolution studies of 22-BT in acetonitrile- $\text{d}_3$ .

| NMR tube | [sample] / $\text{mol}\cdot\text{dm}^{-3}$ | $\delta(\text{H1})$ / ppm | $\delta(\text{H2})$ / ppm | $\delta(\text{H3})$ / ppm |
|----------|--------------------------------------------|---------------------------|---------------------------|---------------------------|
| <b>1</b> | 0.5900                                     | 7.3384                    | 7.2555                    | 7.0672                    |
|          | 0.4916                                     | 7.3417                    | 7.2576                    | 7.0691                    |
|          | 0.4214                                     | 7.3445                    | 7.2593                    | 7.0705                    |
|          | 0.3278                                     | 7.3475                    | 7.2616                    | 7.0727                    |
|          | 0.2950                                     | 7.3487                    | 7.2625                    | 7.0734                    |
|          | 0.2682                                     | 7.3498                    | 7.2631                    | 7.0739                    |
| <b>2</b> | 0.1868                                     | 7.3529                    | 7.2655                    | 7.0758                    |
|          | 0.1334                                     | 7.3547                    | 7.2668                    | 7.0770                    |
| <b>3</b> | 0.1916                                     | 7.3526                    | 7.2653                    | 7.0756                    |
|          | 0.1597                                     | 7.3537                    | 7.2661                    | 7.0764                    |
|          | 0.1198                                     | 7.3555                    | 7.2674                    | 7.0773                    |
|          | 0.0958                                     | 7.3566                    | 7.2681                    | 7.0782                    |

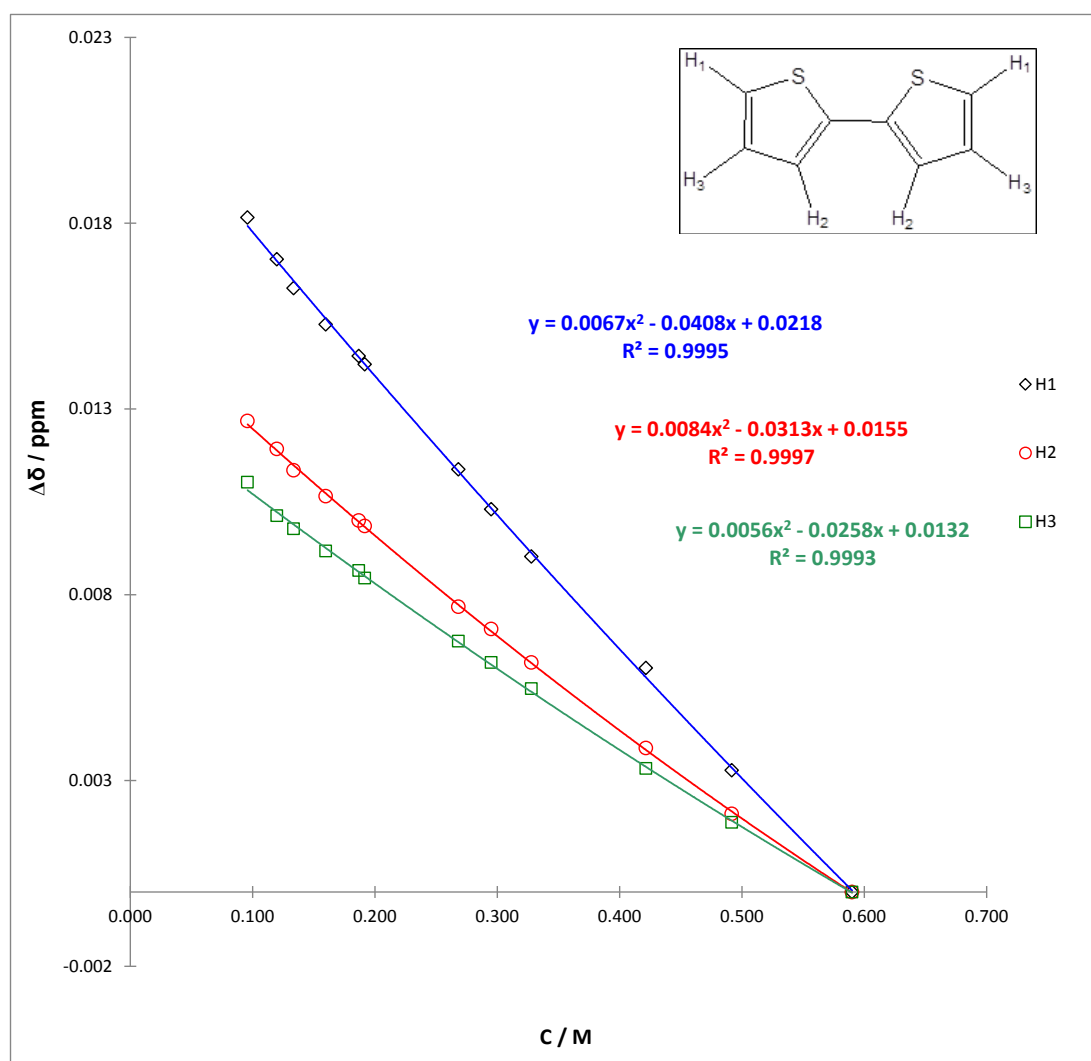

**Figure S9.** Plot of  $\Delta\delta = f(\text{sample concentration})$  for the NMR dissolution studies of 22-BT in acetonitrile- $\text{d}_3$ .

**Table S10.** Results derived from the least squares fitting of equation 2 (in the manuscript) for the NMR dissolution studies of 22-BT in acetonitrile-d<sub>3</sub>.

| Proton | $K_{eq}$ | $\Sigma(\delta_{calc} - \delta_{exp})^2$ |
|--------|----------|------------------------------------------|
| H1     | 0.076    | $1.9 \cdot 10^{-7}$                      |
| H2     | 0.082    | $9.9 \cdot 10^{-8}$                      |
| H3     | 0.081    | $1.0 \cdot 10^{-7}$                      |

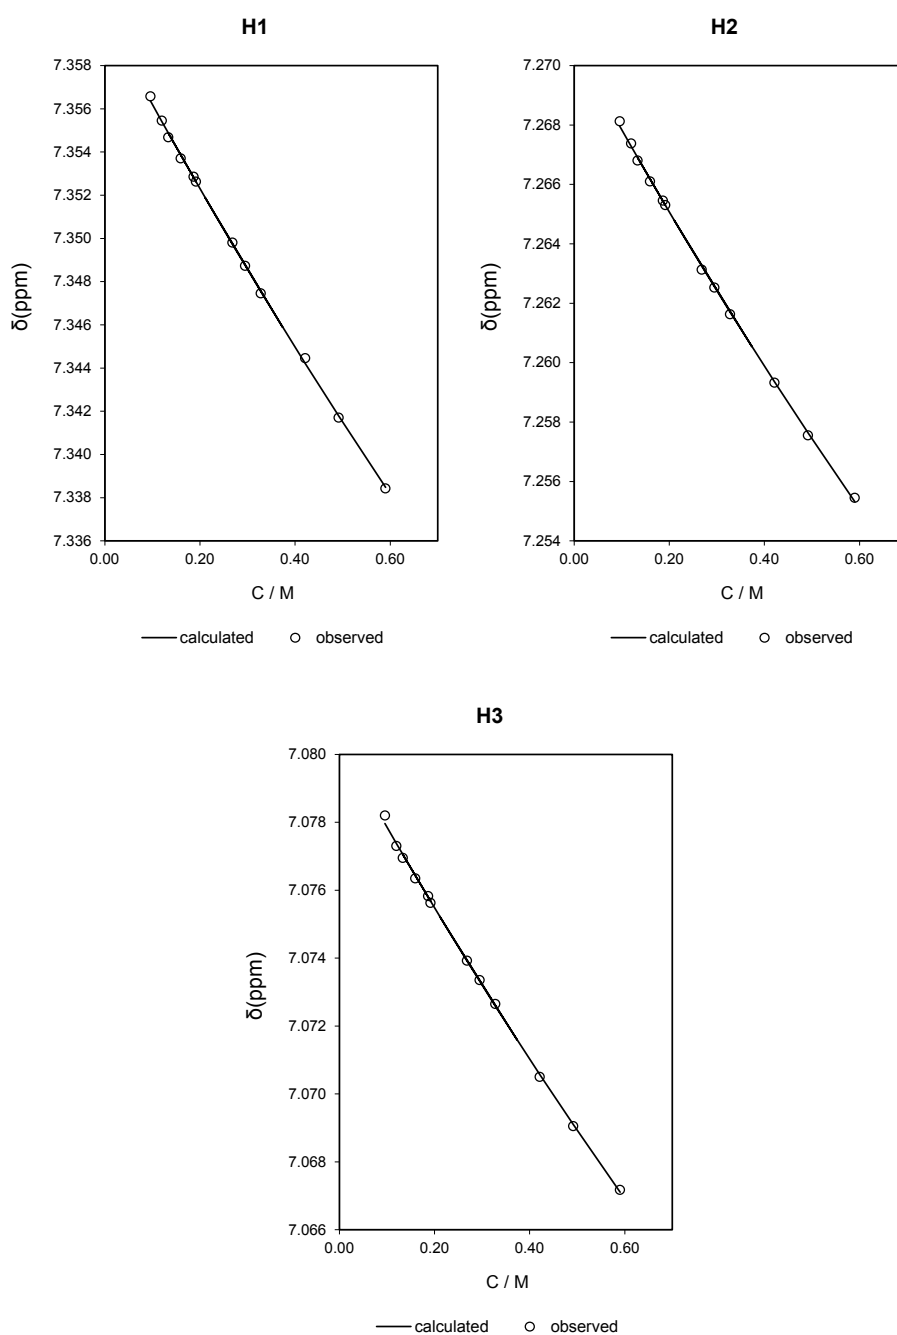

**Figure S10.** Graphical representation of the fitting results of the calculated chemical shifts,  $\delta$ , to the experimental data for the NMR dissolution studies of 22-BT in acetonitrile-d<sub>3</sub>.

### C) 3,3'-Bithiophene (33-BT)

**Table S11.**  $^1\text{H}$  NMR results for the dissolution studies of 33-BT in  $\text{CDCl}_3$ .

| NMR tube | [sample] / $\text{mol}\cdot\text{dm}^{-3}$ | $\delta(\text{H1})$ / ppm | $\delta(\text{H2})$ / ppm |
|----------|--------------------------------------------|---------------------------|---------------------------|
| <b>1</b> | 0.6275                                     | 7.3248                    | 7.3023                    |
|          | 0.5020                                     | 7.3340                    | 7.3116                    |
|          | 0.4183                                     | 7.3402                    | 7.3184                    |
|          | 0.3585                                     | 7.3451                    | 7.3228                    |
|          | 0.3137                                     | 7.3486                    | 7.3265                    |
|          | 0.2092                                     | 7.3563                    | 7.3338                    |
|          | 0.1673                                     | 7.3595                    | 7.3369                    |
|          | 0.1394                                     | 7.3615                    | 7.3389                    |
|          | 0.1141                                     | 7.3638                    | 7.3412                    |
| <b>2</b> | 0.0917                                     | 7.3653                    | 7.3427                    |
|          | 0.0459                                     | 7.3699                    | 7.3469                    |
|          | 0.0306                                     | 7.3707                    | 7.3481                    |
|          | 0.0208                                     | 7.3715                    | 7.3489                    |

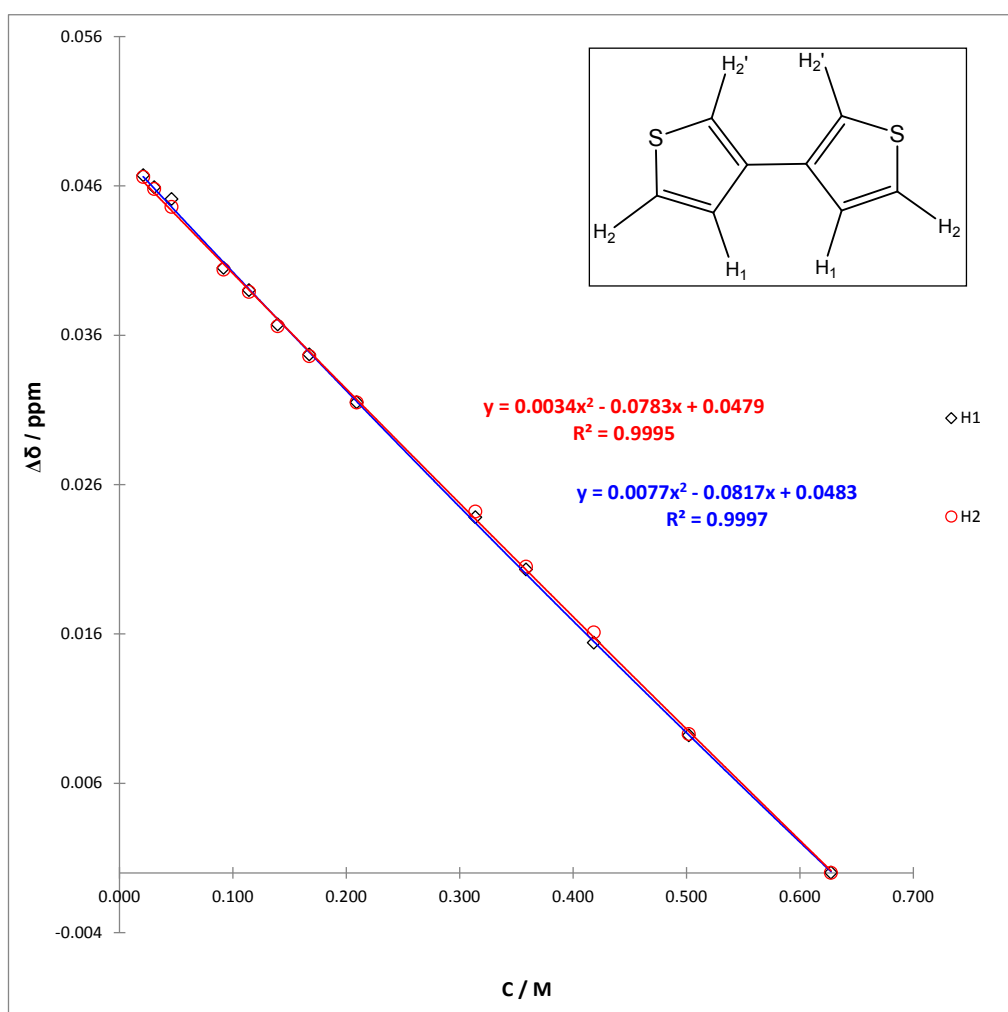

**Figure S11.** Plot of  $\Delta\delta = f(\text{sample concentration})$  for the NMR dissolution studies of 33-BT in  $\text{CDCl}_3$ .

**Table S12.** Results derived from the least squares fitting of equation 2 (in the manuscript) for the NMR dissolution studies of 33-BT in  $\text{CDCl}_3$ .

| Proton | $K_{\text{eq}}$ | $\Sigma(\delta_{\text{calc}} - \delta_{\text{exp}})^2$ |
|--------|-----------------|--------------------------------------------------------|
| H1     | 0.038           | $8.2 \cdot 10^{-7}$                                    |
| H2     | 0.024           | $1.2 \cdot 10^{-6}$                                    |

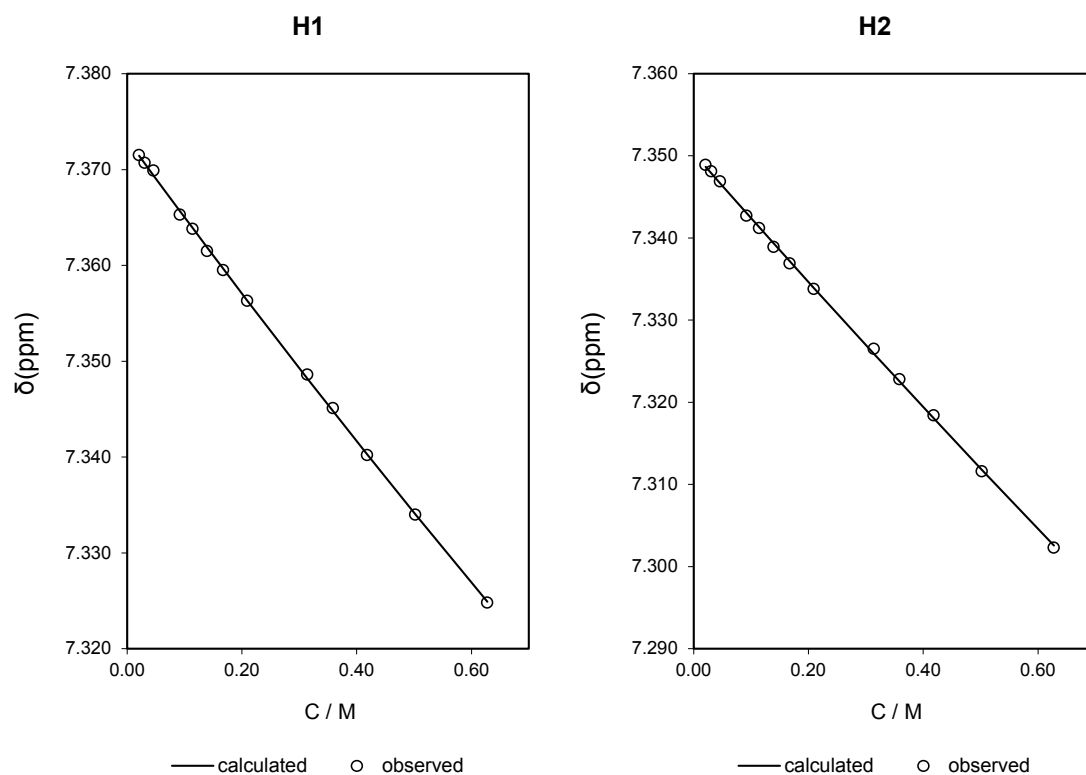

**Figure S12.** Graphical representation of the fitting results of the calculated chemical shifts,  $\delta$ , to the experimental data for the NMR dissolution studies of 33-BT in  $\text{CDCl}_3$ .

**Table S13.**  $^1\text{H}$  NMR results for the dissolution studies of 33-BT in acetone- $\text{d}_6$ .

| NMR tube | [sample] / $\text{mol}\cdot\text{dm}^{-3}$ | $\delta(\text{H1})$ / ppm | $\delta(\text{H2})$ / ppm |
|----------|--------------------------------------------|---------------------------|---------------------------|
| <b>1</b> | 0.5268                                     | 7.6677                    | 7.5159                    |
|          | 0.4390                                     | 7.6711                    | 7.5187                    |
|          | 0.3763                                     | 7.6735                    | 7.5202                    |
|          | 0.3293                                     | 7.6756                    | 7.5218                    |
|          | 0.2634                                     | 7.6774                    | 7.5232                    |
|          | 0.2195                                     | 7.6798                    | 7.5252                    |
| <b>3</b> | 0.0573                                     | 7.6869                    | 7.5302                    |
|          | 0.0287                                     | 7.6882                    | 7.5315                    |
|          | 0.0191                                     | 7.6884                    | 7.5315                    |
|          | 0.0143                                     | 7.6890                    | 7.5317                    |

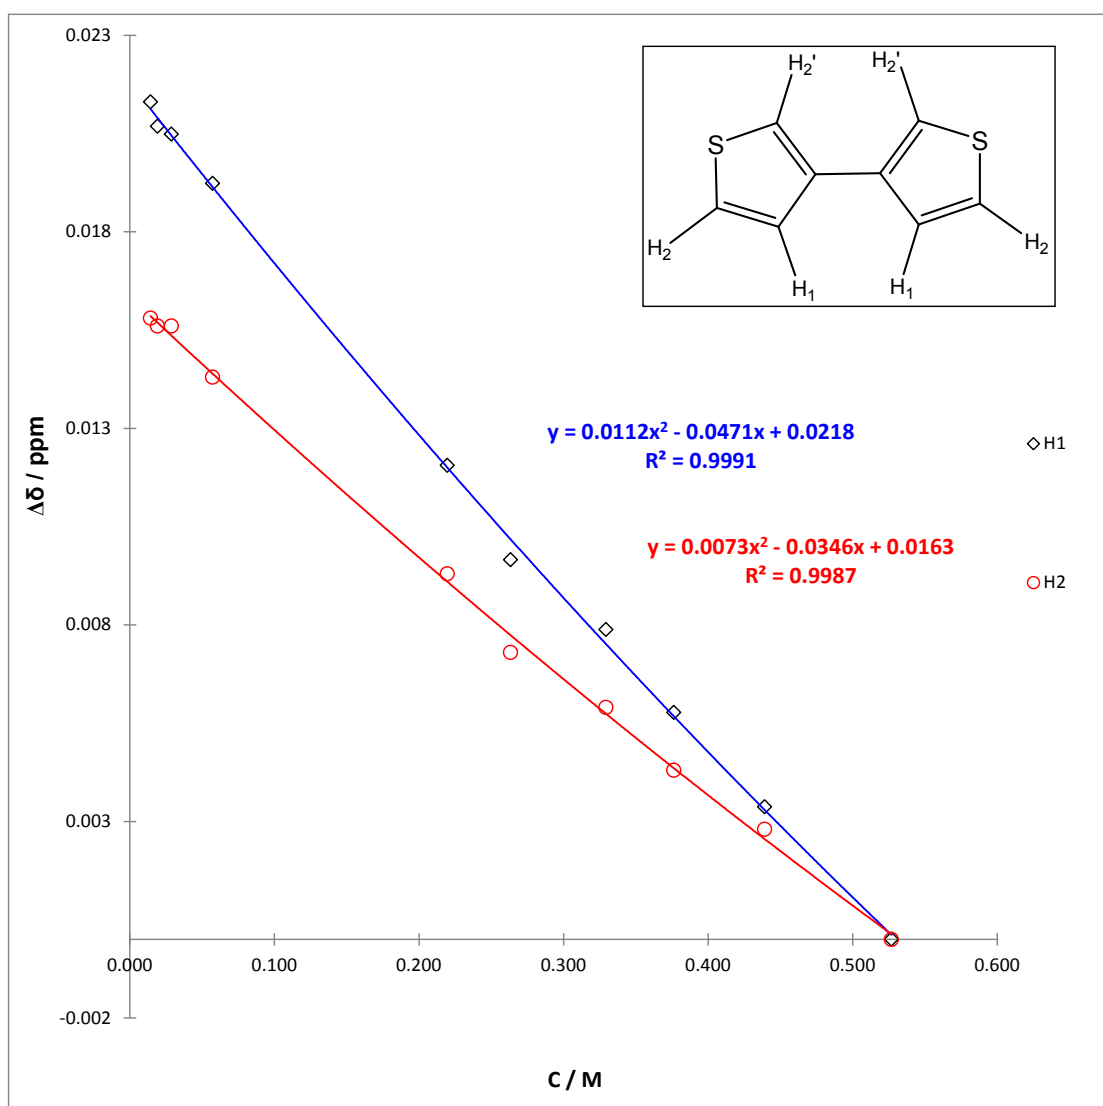

**Figure S13.** Plot of  $\Delta\delta = f(\text{sample concentration})$  for the NMR dissolution studies of 33-BT in acetone- $\text{d}_6$ .

**Table S14.** Results derived from the least squares fitting of equation 2 (in the manuscript) for the NMR dissolution studies of 33-BT in acetone-d<sub>6</sub>.

| Proton | $K_{eq}$ | $\Sigma(\delta_{calc} - \delta_{exp})^2$ |
|--------|----------|------------------------------------------|
| H1     | 0.111    | $5.1 \cdot 10^{-7}$                      |
| H2     | 0.096    | $4.0 \cdot 10^{-7}$                      |

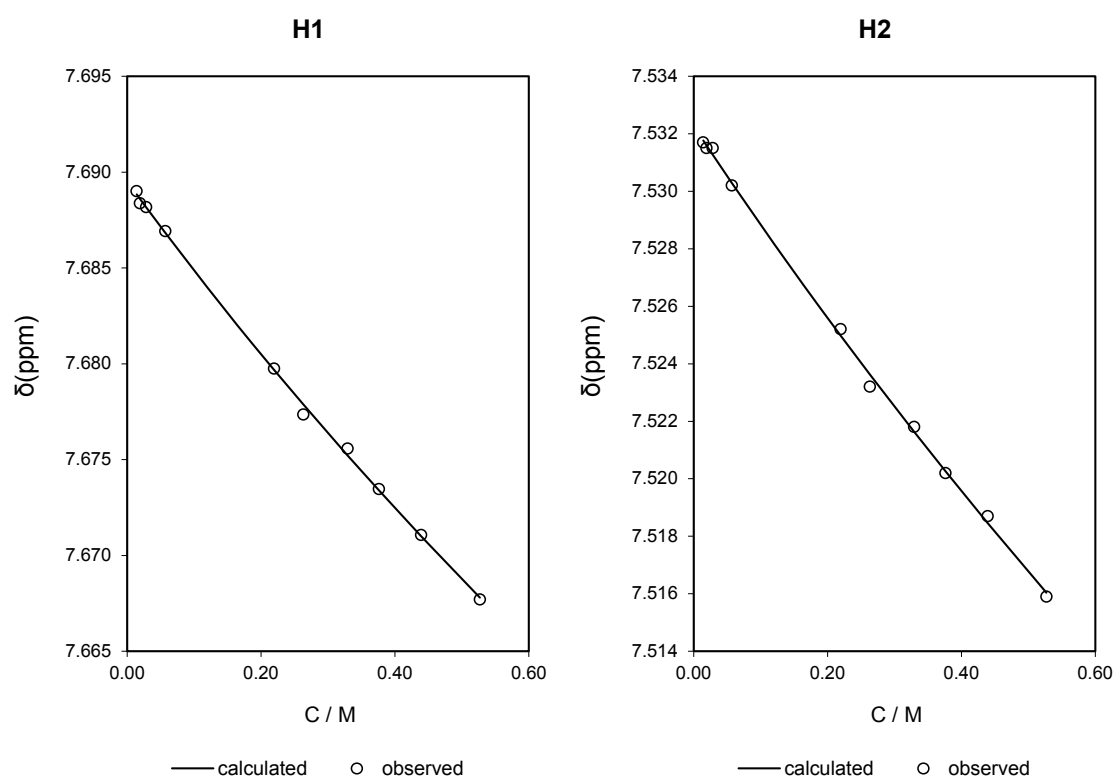

**Figure S14.** Graphical representation of the fitting results of the calculated chemical shifts,  $\delta$ , to the experimental data for the NMR dissolution studies of 33-BT in acetone-d<sub>6</sub>.

**Table S15.**  $^1\text{H}$  NMR results for the dissolution studies of 33-BT in acetonitrile- $\text{d}_3$ .

| NMR tube | [sample] / $\text{mol}\cdot\text{dm}^{-3}$ | $\delta(\text{H1})$ / ppm | $\delta(\text{H2})$ / ppm |
|----------|--------------------------------------------|---------------------------|---------------------------|
| <b>1</b> | 0.2621                                     | 7.5598                    | 7.4670                    |
|          | 0.2184                                     | 7.5619                    | 7.4684                    |
|          | 0.1872                                     | 7.5635                    | 7.4693                    |
|          | 0.1638                                     | 7.5644                    | 7.4700                    |
|          | 0.1456                                     | 7.5653                    | 7.4705                    |
|          | 0.1191                                     | 7.5668                    | 7.4715                    |
|          | 0.1008                                     | 7.5677                    | ---                       |
| <b>2</b> | 0.1775                                     | 7.5639                    | ---                       |
|          | 0.0887                                     | 7.5683                    | ---                       |
|          | 0.0634                                     | ---                       | 7.4734                    |
| <b>3</b> | 0.0856                                     | 7.5683                    | 7.4727                    |
|          | 0.0713                                     | 7.5693                    | 7.4731                    |
|          | 0.0428                                     | 7.5707                    | 7.4742                    |
|          | 0.0306                                     | 7.5713                    | ---                       |

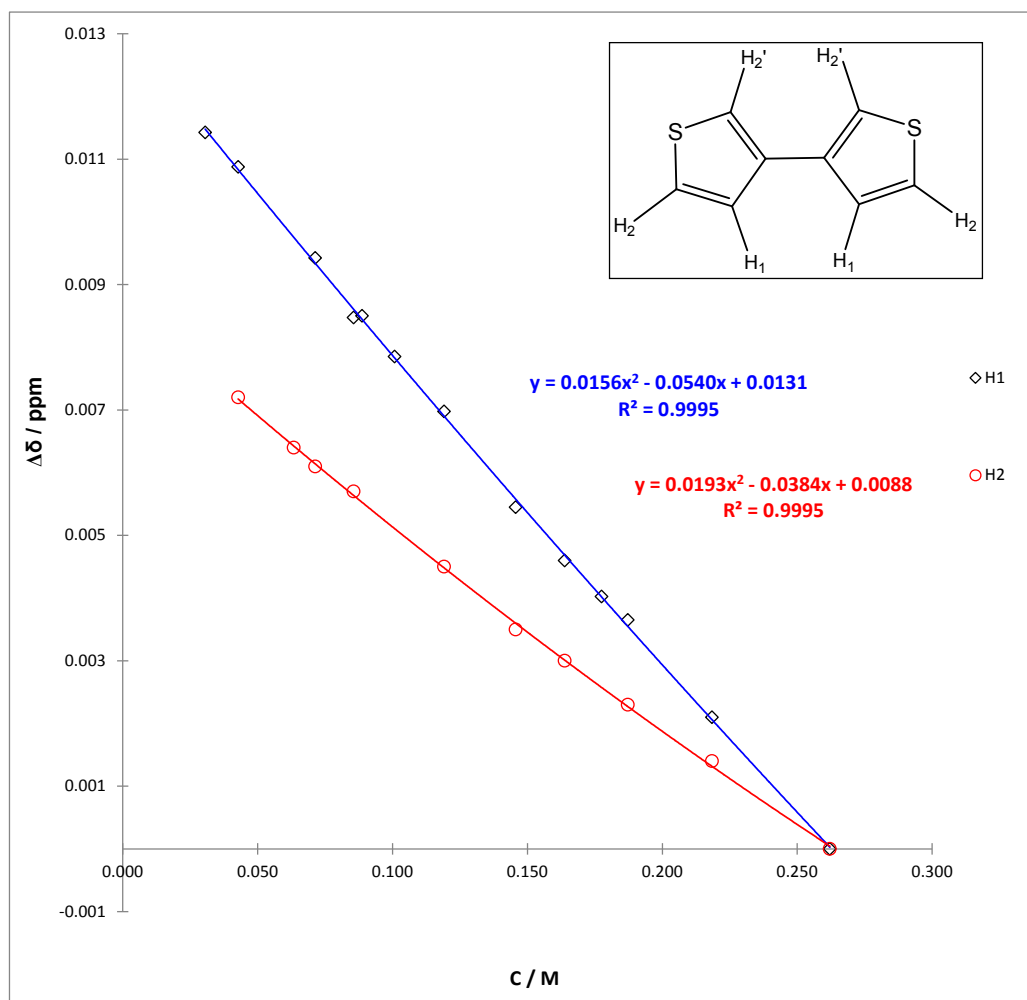

**Figure S15.** Plot of  $\Delta\delta = f(\text{sample concentration})$  for the NMR dissolution studies of 33-BT in acetonitrile- $\text{d}_3$ .



**Table S16.** Results derived from the least squares fitting of equation 2 (in the manuscript) for the NMR dissolution studies of 33-BT in acetonitrile-d<sub>3</sub>.

| Proton | $K_{eq}$ | $\Sigma(\delta_{calc} - \delta_{exp})^2$ |
|--------|----------|------------------------------------------|
| H1     | 0.160    | $8.6 \cdot 10^{-8}$                      |
| H2     | 0.156    | $4.5 \cdot 10^{-8}$                      |

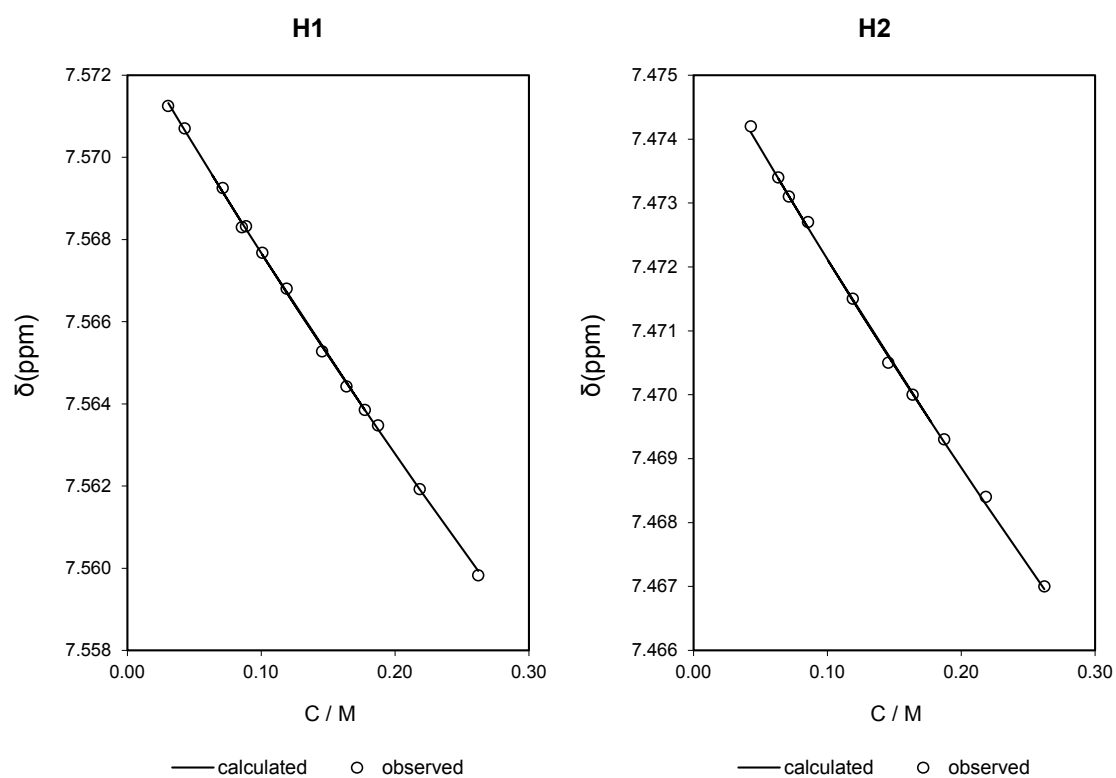

**Figure S16.** Graphical representation of the fitting results of the calculated chemical shifts,  $\delta$ , to the experimental data for the NMR dissolution studies of 33-BT in acetonitrile-d<sub>3</sub>.

## D) 2,2',5',2''-Terthiophene (2252-TT)

Table S17. <sup>1</sup>H NMR results for the dissolution studies of 2252-TT in CDCl<sub>3</sub>.

| NMR tube | [sample] / mol·dm <sup>-3</sup> | δ(H1) / ppm | δ(H2) / ppm | δ(H3) / ppm | δ(H4) / ppm |
|----------|---------------------------------|-------------|-------------|-------------|-------------|
| 1        | 0.4242                          | 7.1780      | 6.9844      | 7.1406      | 7.0426      |
|          | 0.3394                          | 7.1863      | 6.9918      | 7.1473      | 7.0497      |
|          | 0.2828                          | 7.1919      | 6.9969      | 7.1517      | 7.0542      |
|          | 0.2424                          | 7.1962      | 7.0008      | 7.1551      | 7.0582      |
|          | 0.2121                          | 7.1994      | 7.0040      | 7.1579      | 7.0612      |
|          | 0.1414                          | 7.2072      | 7.0107      | 7.1639      | 7.0680      |
|          | 0.1212                          | 7.2089      | 7.0127      | 7.1657      | 7.0695      |
|          | 0.1060                          | 7.2102      | 7.0137      | 7.1665      | 7.0708      |
|          | 0.0893                          | ---         | ---         | ---         | 7.0724      |
|          | 0.0771                          | 7.2134      | 7.0168      | 7.1691      | 7.0736      |
| 2        | 0.0196                          | 7.2209      | 7.0235      | 7.1752      | 7.0804      |
|          | 0.0088                          | 7.2220      | 7.0246      | 7.1763      | 7.0812      |

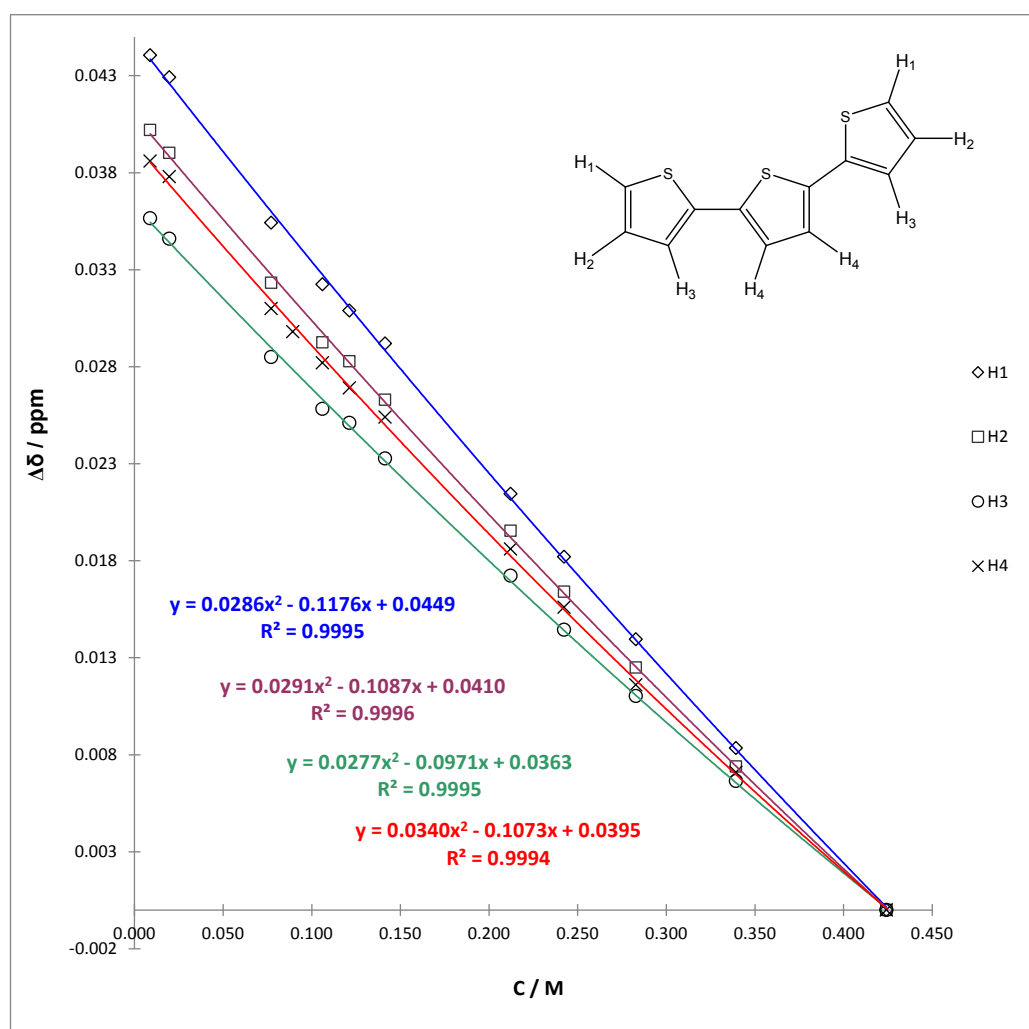

Figure S17. Plot of  $\Delta\delta = f(\text{sample concentration})$  for the NMR dissolution studies of 2252-TT in CDCl<sub>3</sub>.

**Table S18.** Results derived from the least squares fitting of equation 2 (in the manuscript) for the NMR dissolution studies of 2252-TT in  $\text{CDCl}_3$ .

| Proton | $K_{\text{eq}}$ | $\Sigma(\delta_{\text{calc}} - \delta_{\text{exp}})^2$ |
|--------|-----------------|--------------------------------------------------------|
| H1     | 0.107           | $8.9 \cdot 10^{-7}$                                    |
| H2     | 0.121           | $6.1 \cdot 10^{-7}$                                    |
| H3     | 0.132           | $6.4 \cdot 10^{-7}$                                    |
| H4     | 0.151           | $8.9 \cdot 10^{-7}$                                    |

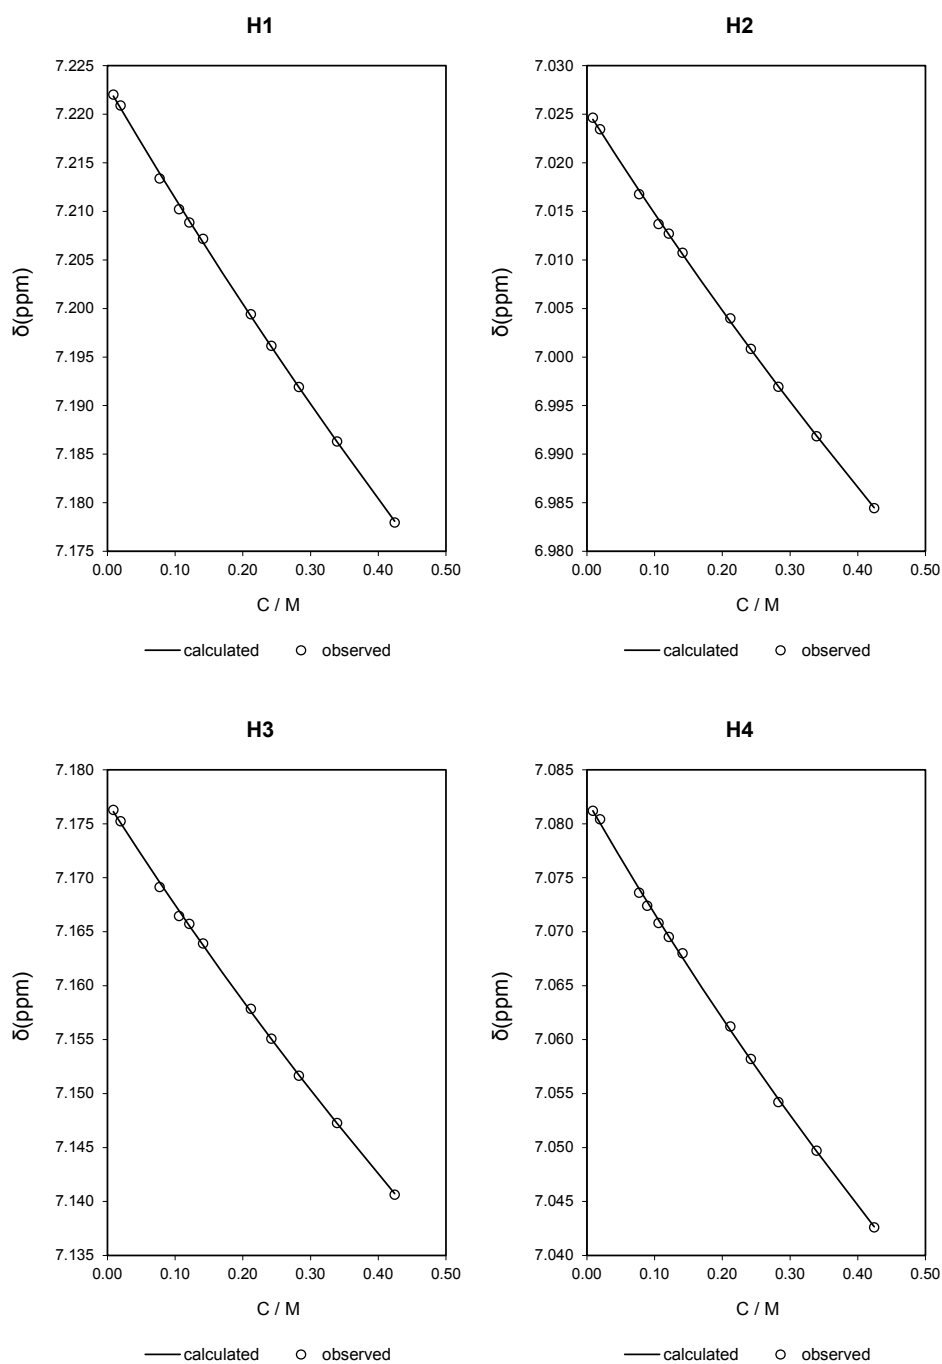

**Figure S18.** Graphical representation of the fitting results of the calculated chemical shifts,  $\delta$ , to the experimental data for the NMR dissolution studies of 2252-TT in  $\text{CDCl}_3$ .

**Table S19.**  $^1\text{H}$  NMR results for the dissolution studies of 2252-TT in acetone- $d_6$ .

| NMR tube | [sample] / $\text{mol}\cdot\text{dm}^{-3}$ | $\delta(\text{H1})$ / ppm | $\delta(\text{H2})$ / ppm | $\delta(\text{H3})$ / ppm | $\delta(\text{H4})$ / ppm |
|----------|--------------------------------------------|---------------------------|---------------------------|---------------------------|---------------------------|
| <b>1</b> | 0.3318                                     | 7.4303                    | 7.0905                    | 7.2962                    | 7.2078                    |
|          | 0.2765                                     | 7.4339                    | ---                       | 7.2991                    | ---                       |
|          | 0.2370                                     | 7.4370                    | 7.0950                    | 7.3021                    | 7.2148                    |
|          | 0.2074                                     | 7.4396                    | 7.0966                    | 7.3045                    | 7.2175                    |
|          | 0.1843                                     | 7.4411                    | 7.0979                    | 7.3059                    | 7.2190                    |
|          | 0.1508                                     | 7.4439                    | 7.0995                    | 7.3084                    | 7.2218                    |
|          | 0.1185                                     | 7.4468                    | 7.1018                    | 7.3112                    | 7.2248                    |
|          | 0.0976                                     | 7.4486                    | 7.1032                    | 7.3130                    | 7.2266                    |
| <b>2</b> | 0.0830                                     | 7.4505                    | 7.1044                    | 7.3147                    | 7.2287                    |
|          | 0.0371                                     | 7.4547                    | 7.1073                    | 7.3185                    | 7.2331                    |
|          | 0.0297                                     | 7.4551                    | 7.1078                    | 7.3192                    | 7.2342                    |
| <b>3</b> | 0.0165                                     | 7.4566                    | 7.1086                    | 7.3204                    | 7.2350                    |
|          | 0.0057                                     | 7.4577                    | 7.1092                    | 7.3213                    | 7.2360                    |

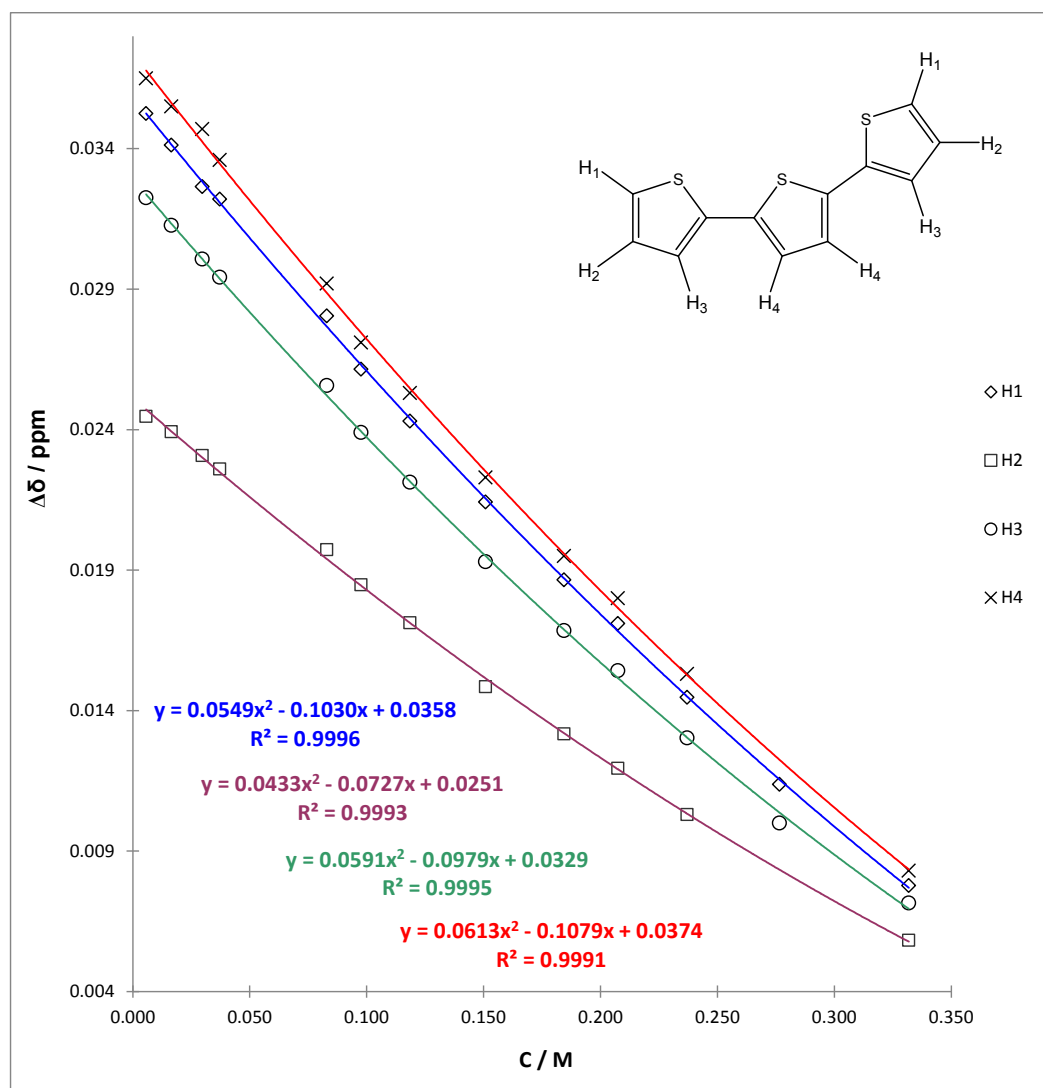

**Figure S19.** Plot of  $\Delta\delta = f(\text{sample concentration})$  for the NMR dissolution studies of 2252-TT in acetone- $d_6$ .

**Table S20.** Results derived from the least squares fitting of equation 2 (in the manuscript) for the NMR dissolution studies of 2252-TT in acetone-d<sub>6</sub>.

| Proton | $K_{eq}$ | $\Sigma(\delta_{calc} - \delta_{exp})^2$ |
|--------|----------|------------------------------------------|
| H1     | 0.273    | $4.0 \cdot 10^{-7}$                      |
| H2     | 0.316    | $3.6 \cdot 10^{-7}$                      |
| H3     | 0.324    | $5.8 \cdot 10^{-7}$                      |
| H4     | 0.306    | $7.9 \cdot 10^{-7}$                      |

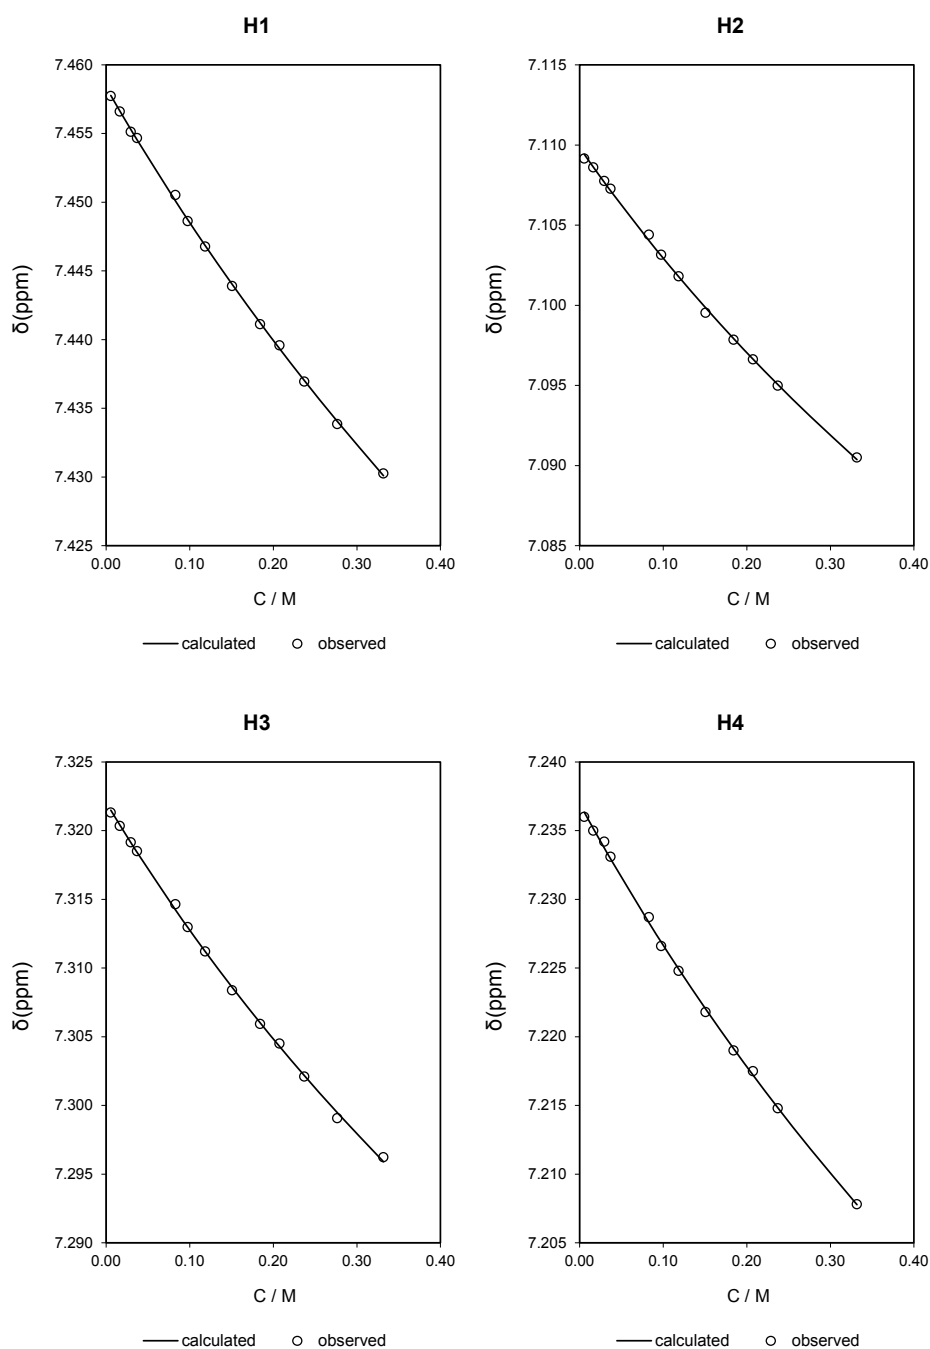

**Figure S20.** Graphical representation of the fitting results of the calculated chemical shifts,  $\delta$ , to the experimental data for the NMR dissolution studies of 2252-TT in acetone-d<sub>6</sub>.

**E) 3,3'''-Dihexyl-2,2':5',2'':5'',2'''-quaterthiophene (DH- $\alpha$ -QT)**

**Table S21.**  $^1\text{H}$  NMR results for the dissolution studies of DH- $\alpha$ -QT in  $\text{CDCl}_3$ .

| NMR tube | [sample] / $\text{mol}\cdot\text{dm}^{-3}$ | $\delta(\text{H1})$ / ppm | $\delta(\text{H2})$ / ppm | $\delta(\text{H4})$ / ppm |
|----------|--------------------------------------------|---------------------------|---------------------------|---------------------------|
| <b>1</b> | 0.2873                                     | 7.1428                    | 7.0995                    | 6.9146                    |
|          | 0.2394                                     | 7.1486                    | 7.1037                    | 6.9187                    |
|          | 0.1795                                     | 7.1563                    | 7.1093                    | 6.9240                    |
|          | 0.1436                                     | 7.1613                    | 7.1133                    | 6.9278                    |
|          | 0.1026                                     | 7.1672                    | 7.1176                    | 6.9320                    |
| <b>2</b> | 0.1847                                     | 7.1551                    | 7.1084                    | 6.9235                    |
|          | 0.1539                                     | 7.1589                    | 7.1114                    | 6.9260                    |
|          | 0.0923                                     | 7.1676                    | 7.1179                    | 6.9322                    |
|          | 0.0660                                     | 7.1722                    | 7.1215                    | 6.9356                    |
| <b>3</b> | 0.1358                                     | 7.1618                    | 7.1135                    | 6.9280                    |
|          | 0.0849                                     | 7.1690                    | 7.1190                    | 6.9334                    |
|          | 0.0566                                     | 7.1731                    | 7.1220                    | 6.9359                    |
|          | 0.0485                                     | 7.1742                    | 7.1227                    | 6.9369                    |

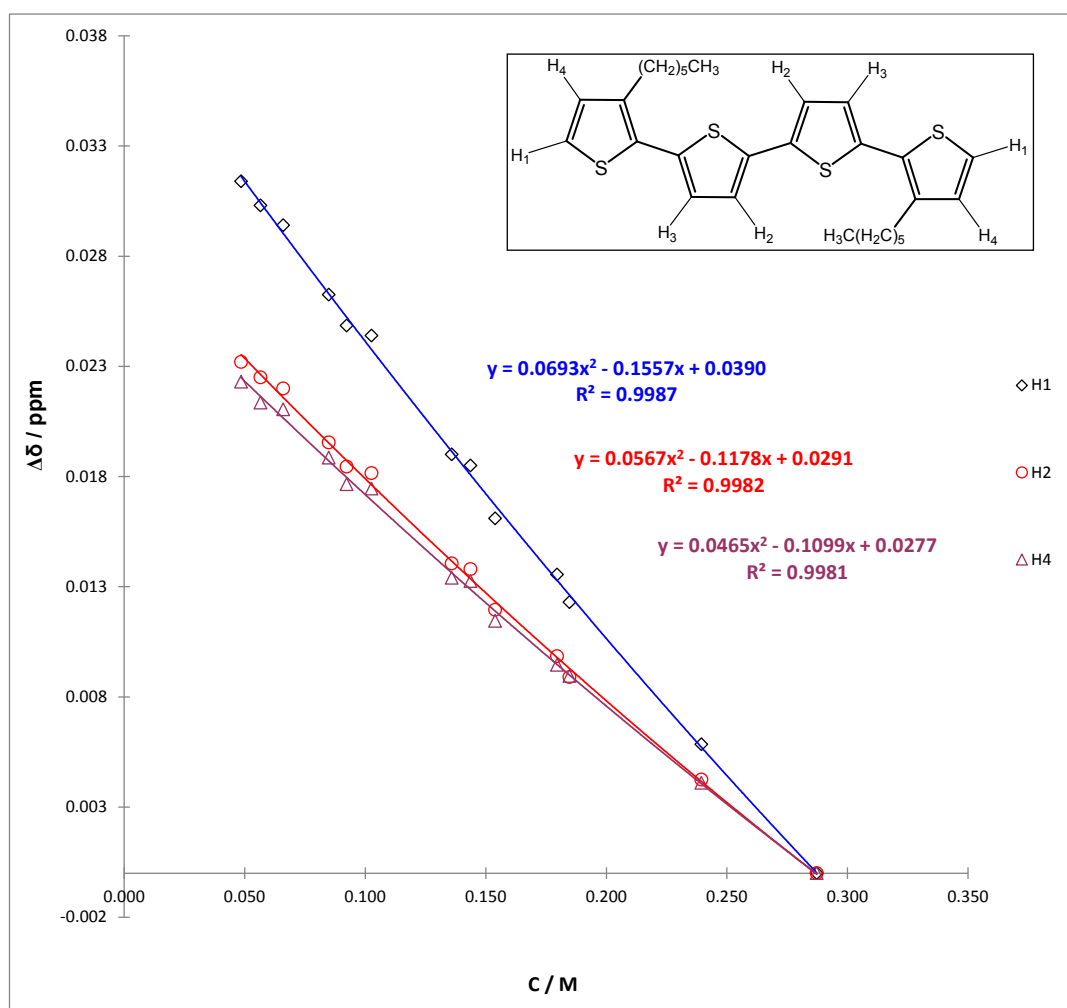

**Figure S21.** Plot of  $\Delta\delta = f(\text{sample concentration})$  for the NMR dissolution studies of DH- $\alpha$ -QT in  $\text{CDCl}_3$ .

**Table S22.** Results derived from the least squares fitting of equation 2 (in the manuscript) for the NMR dissolution studies of DH- $\alpha$ -QT in CDCl<sub>3</sub>.

| Proton | $K_{eq}$ | $\Sigma(\delta_{calc} - \delta_{exp})^2$ |
|--------|----------|------------------------------------------|
| H1     | 0.212    | $1.5 \cdot 10^{-6}$                      |
| H2     | 0.231    | $1.2 \cdot 10^{-6}$                      |
| H4     | 0.195    | $1.1 \cdot 10^{-6}$                      |

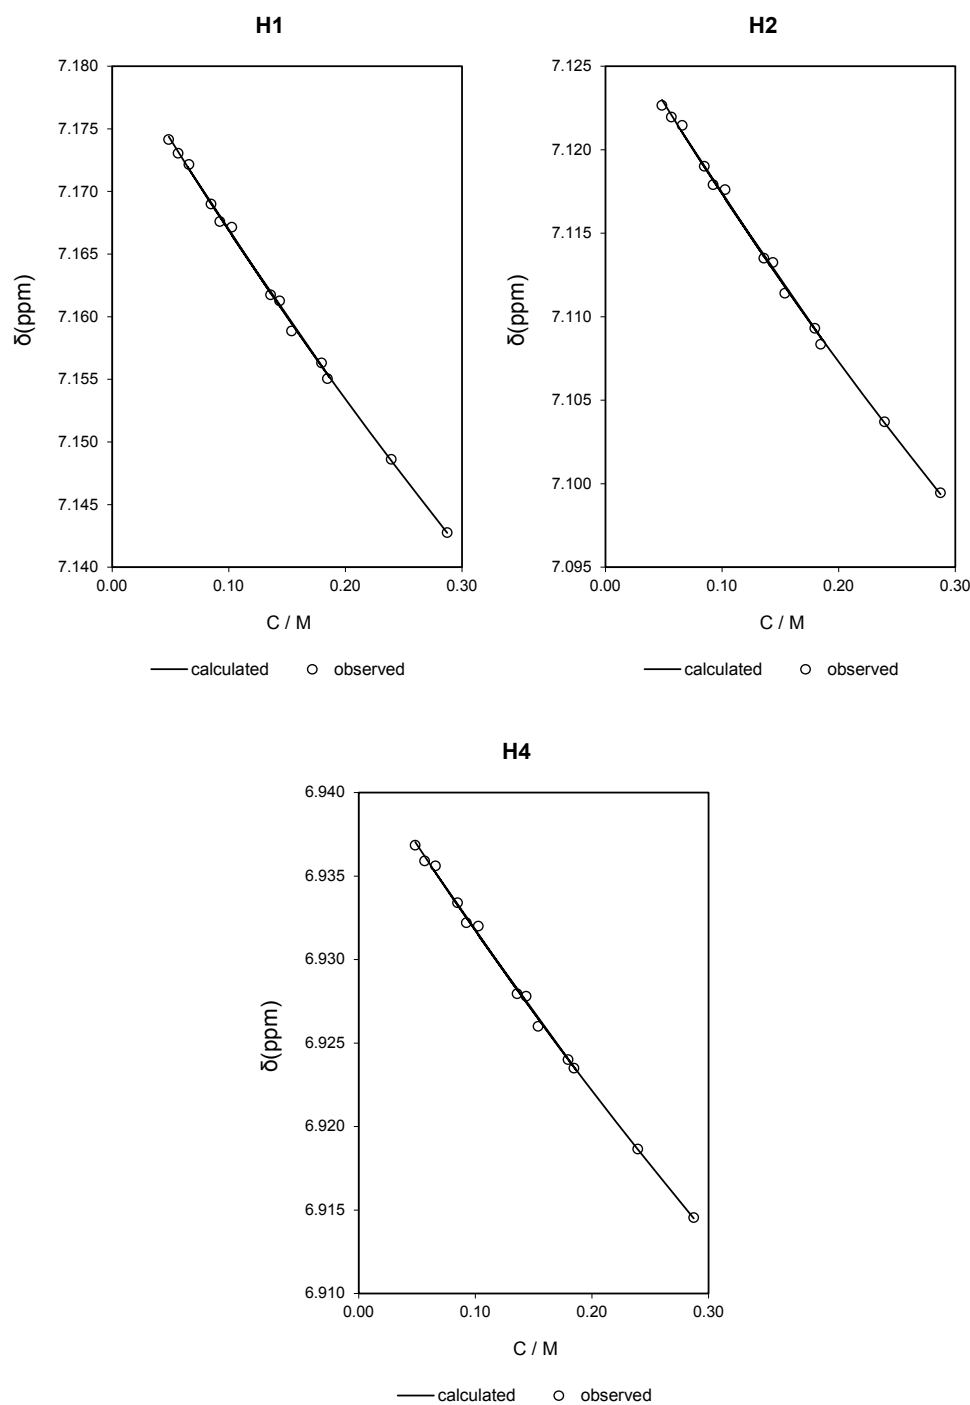

**Figure S22.** Graphical representation of the fitting results of the calculated chemical shifts,  $\delta$ , to the experimental data for the NMR dissolution studies of DH- $\alpha$ -QT in CDCl<sub>3</sub>.

**Table S23.**  $^1\text{H}$  NMR results for the dissolution studies of DH- $\alpha$ -QT in acetone- $d_6$ .

| NMR tube | [sample] / mol·dm $^{-3}$ | $\delta(\text{H2})$ / ppm | $\delta(\text{H3})$ / ppm | $\delta(\text{H4})$ / ppm |
|----------|---------------------------|---------------------------|---------------------------|---------------------------|
| <b>1</b> | 0.1916                    | 7.2661                    | 7.1150                    | 7.0344                    |
|          | 0.1597                    | 7.2746                    | 7.1217                    | 7.0403                    |
|          | 0.1369                    | 7.2822                    | 7.1273                    | 7.0454                    |
|          | 0.1198                    | 7.2872                    | 7.1309                    | 7.0487                    |
|          | 0.0958                    | 7.2955                    | 7.1370                    | 7.0539                    |
|          | 0.0684                    | 7.3053                    | 7.1442                    | 7.0601                    |
| <b>2</b> | 0.0531                    | 7.3107                    | 7.1481                    | 7.0634                    |
|          | 0.0379                    | 7.3165                    | 7.1525                    | 7.0672                    |
| <b>3</b> | 0.0629                    | 7.3066                    | 7.1450                    | 7.0608                    |
|          | 0.0440                    | 7.3142                    | 7.1507                    | 7.0657                    |
|          | 0.0314                    | 7.3193                    | 7.1545                    | 7.0689                    |

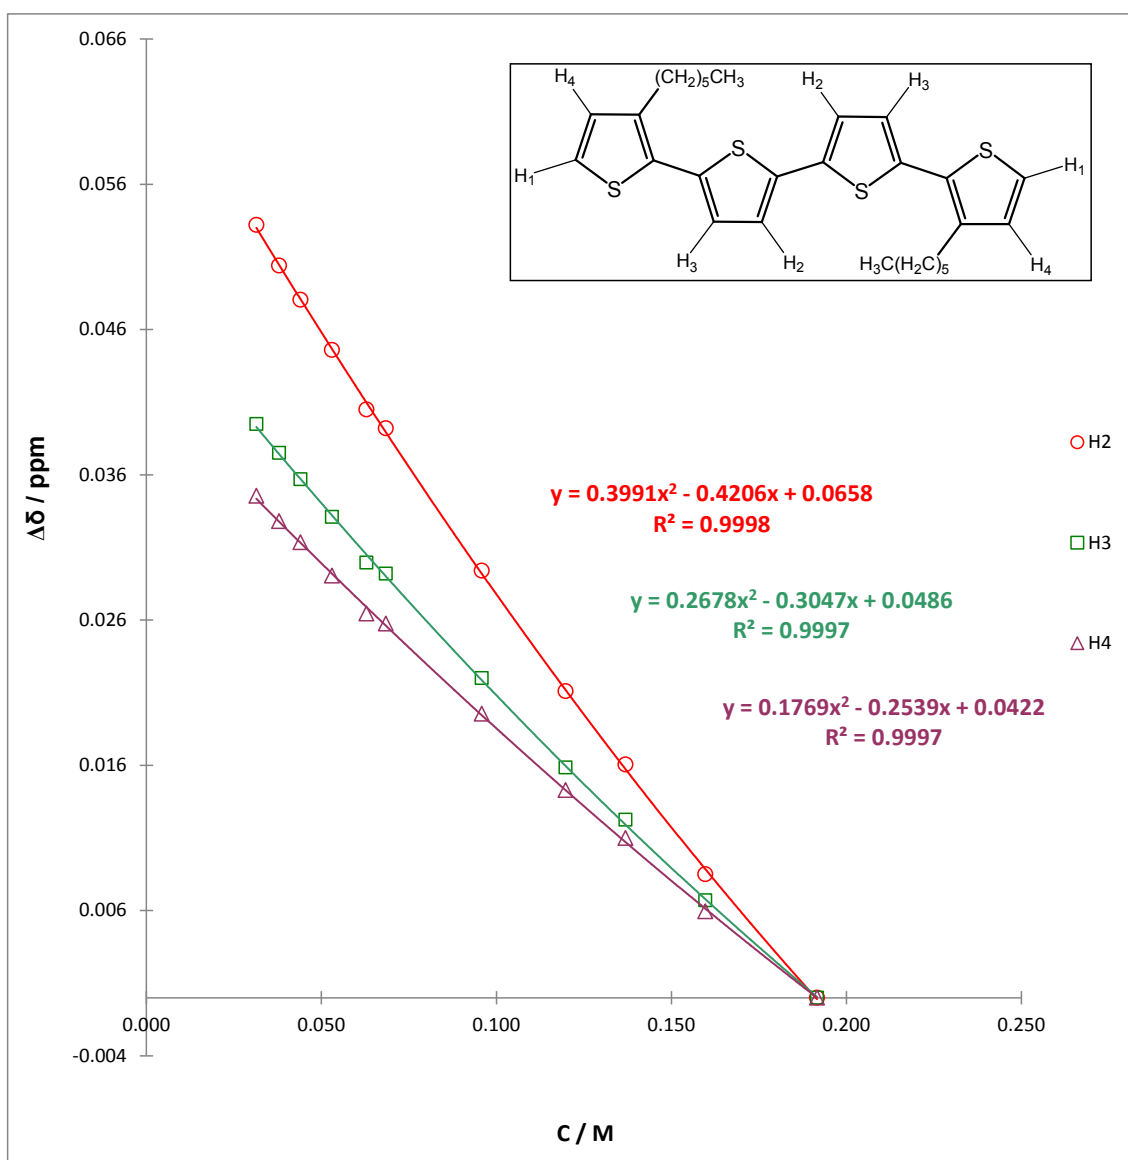

**Figure S23.** Plot of  $\Delta\delta = f(\text{sample concentration})$  for the NMR dissolution studies of DH- $\alpha$ -QT in acetone- $d_6$ .



**Table S24.** Results derived from the least squares fitting of equation 2 (in the manuscript) for the NMR dissolution studies of DH- $\alpha$ -QT in acetone- $d_6$ .

| Proton | $K_{eq}$ | $\Sigma(\delta_{calc} - \delta_{exp})^2$ |
|--------|----------|------------------------------------------|
| H2     | 0.558    | $6.4 \cdot 10^{-7}$                      |
| H3     | 0.506    | $4.8 \cdot 10^{-7}$                      |
| H4     | 0.354    | $3.6 \cdot 10^{-7}$                      |

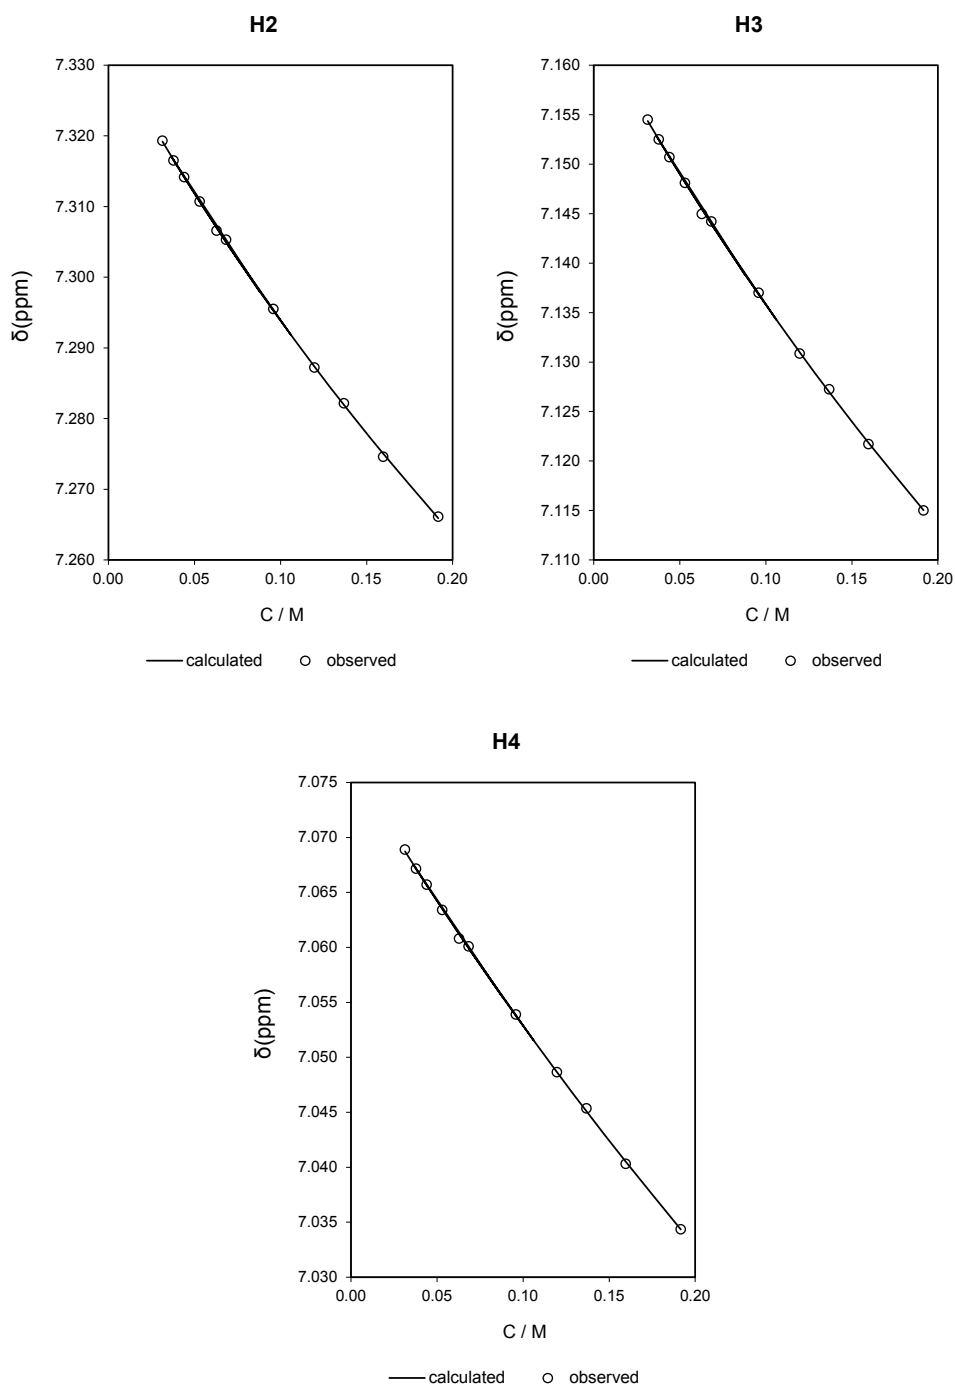

**Figure S24.** Graphical representation of the fitting results of the calculated chemical shifts,  $\delta$ , to the experimental data for the NMR dissolution studies of DH- $\alpha$ -QT in acetone- $d_6$ .

F) 3,3'''-Didodecyl-2,2':5',2'':5'',2'''-quaterthiophene (DD- $\alpha$ -QT)

Table S25.  $^1\text{H}$  NMR results for the dissolution studies of DD- $\alpha$ -QT in  $\text{CDCl}_3$ .

| NMR tube | [sample] / $\text{mol}\cdot\text{dm}^{-3}$ | $\delta(\text{H1})$ / ppm | $\delta(\text{H2})$ / ppm | $\delta(\text{H3})$ / ppm | $\delta(\text{H4})$ / ppm |
|----------|--------------------------------------------|---------------------------|---------------------------|---------------------------|---------------------------|
| <b>1</b> | 0.1868                                     | 7.1504                    | 7.1034                    | 7.0014                    | 6.9196                    |
|          | 0.1557                                     | 7.1545                    | 7.1065                    | 7.0033                    | 6.9225                    |
|          | 0.1334                                     | 7.1587                    | 7.1093                    | 7.0060                    | 6.9257                    |
|          | 0.1168                                     | 7.1607                    | 7.1108                    | 7.0071                    | 6.9270                    |
|          | 0.0934                                     | 7.1647                    | 7.1136                    | 7.0098                    | 6.9299                    |
|          | 0.0849                                     | 7.1657                    | 7.1147                    | 7.0099                    | 6.9305                    |
|          | 0.0667                                     | 7.1689                    | 7.1165                    | 7.0114                    | 6.9326                    |
| <b>2</b> | 0.1001                                     | 7.1634                    | 7.1131                    | 7.0087                    | 6.9290                    |
|          | 0.0715                                     | 7.1678                    | 7.1163                    | 7.0113                    | 6.9321                    |
|          | 0.0358                                     | 7.1741                    | 7.1205                    | 7.0147                    | 6.9364                    |
| <b>3</b> | 0.0686                                     | 7.1687                    | 7.1164                    | 7.0114                    | 6.9325                    |
|          | 0.0429                                     | 7.1729                    | 7.1201                    | 7.0140                    | 6.9357                    |
|          | 0.0312                                     | 7.1747                    | 7.1211                    | 7.0153                    | 6.9369                    |

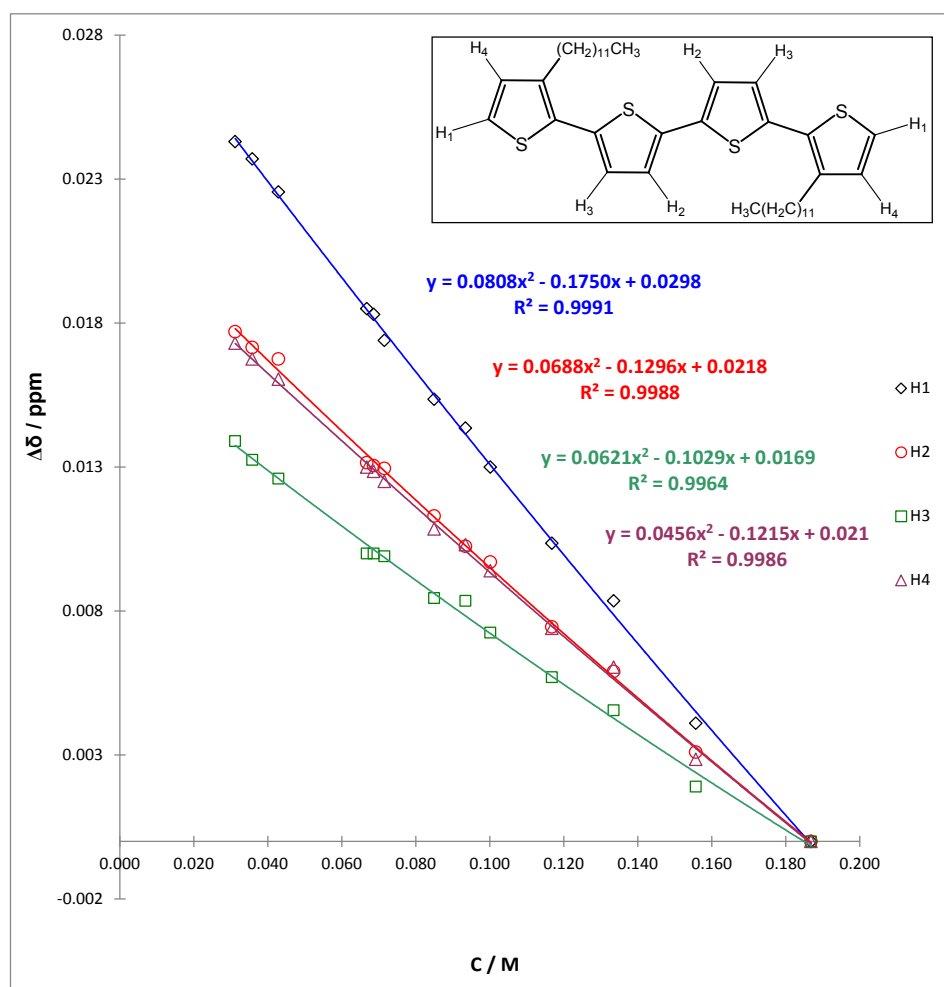

Figure S25. Plot of  $\Delta\delta = f(\text{sample concentration})$  for the NMR dissolution studies of DD- $\alpha$ -QT in  $\text{CDCl}_3$ .

**Table S26.** Results derived from the least squares fitting of equation 2 (in the manuscript) for the NMR dissolution studies of DD- $\alpha$ -QT in CDCl<sub>3</sub>.

| Proton | $K_{eq}$ | $\Sigma(\delta_{calc} - \delta_{exp})^2$ |
|--------|----------|------------------------------------------|
| H1     | 0.201    | $6.1 \cdot 10^{-7}$                      |
| H2     | 0.239    | $4.2 \cdot 10^{-7}$                      |
| H3     | 0.281    | $7.7 \cdot 10^{-7}$                      |
| H4     | 0.167    | $4.6 \cdot 10^{-7}$                      |

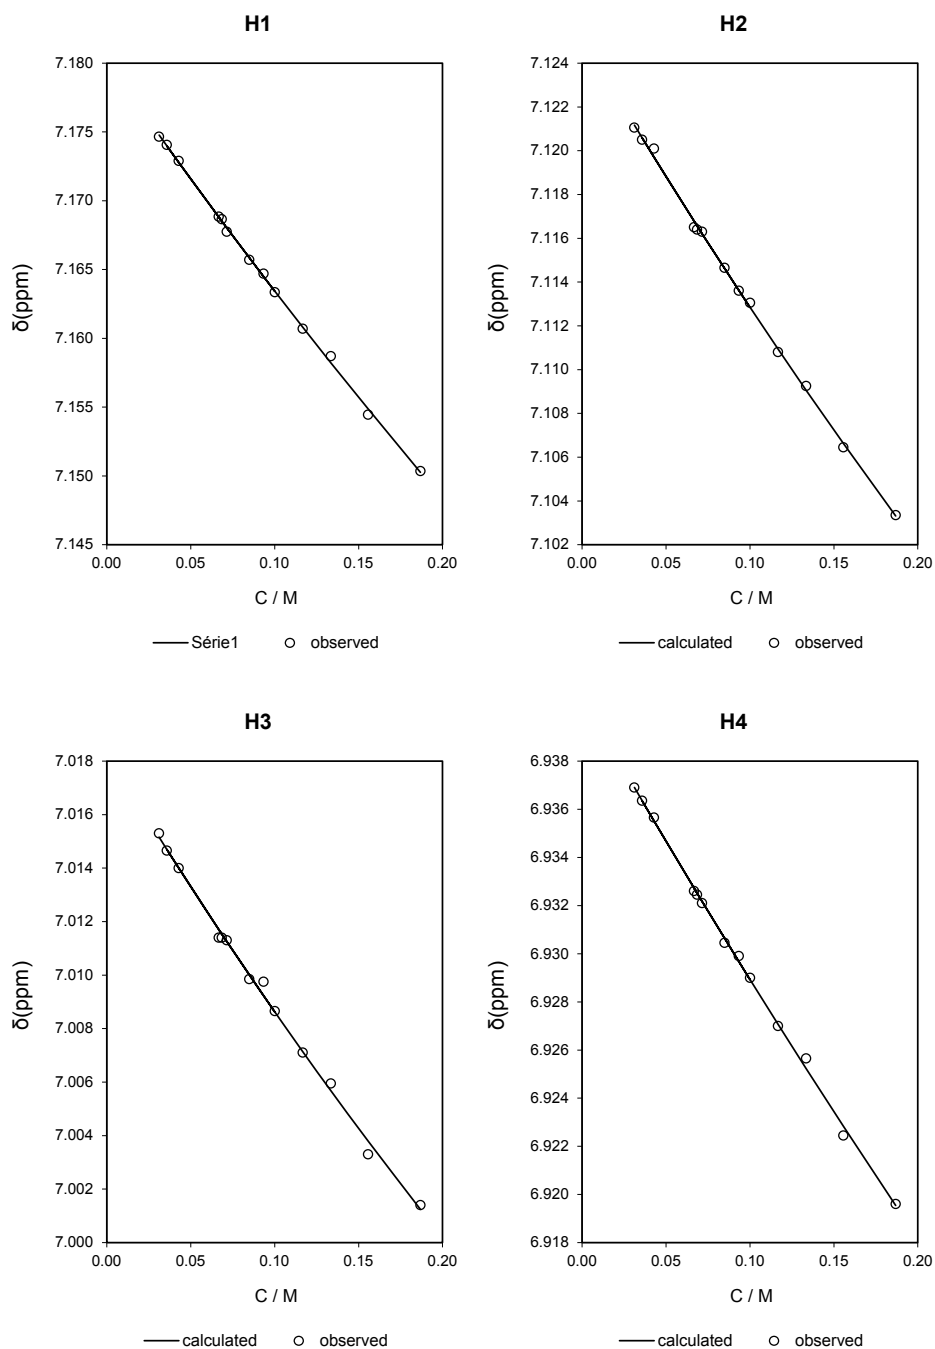

**Figure S26.** Graphical representation of the fitting results of the calculated chemical shifts,  $\delta$ , to the experimental data for the NMR dissolution studies of DD- $\alpha$ -QT in CDCl<sub>3</sub>.

**Table S27.** <sup>1</sup>H NMR dissolution results respecting the alkyl protons of the α-quaterthiophene alkyl derivatives for the solutions of highest and lowest sample concentration in the given solvents.

| Compound                             | [sample] /<br>mol·dm <sup>-3</sup> | δ(CH <sub>2</sub> ) <sub>1</sub> /<br>ppm <sup>a</sup> | δ(CH <sub>2</sub> ) <sub>2</sub> /<br>ppm <sup>b</sup> | δ(CH <sub>2</sub> ) <sub>mid</sub> /<br>ppm <sup>c</sup> | δ(CH <sub>3</sub> ) /<br>ppm <sup>d</sup> |
|--------------------------------------|------------------------------------|--------------------------------------------------------|--------------------------------------------------------|----------------------------------------------------------|-------------------------------------------|
| DH-α-QT<br>(CDCl <sub>3</sub> )      | 0.2873                             | 2.7664                                                 | 1.6381                                                 | 1.3162                                                   | 0.8803                                    |
|                                      | 0.0485                             | 2.7776                                                 | 1.6481                                                 | 1.3239                                                   | 0.8854                                    |
|                                      | <b>Δδ / ppm</b>                    | <b>0.0112</b>                                          | <b>0.0100</b>                                          | <b>0.0077</b>                                            | <b>0.0051</b>                             |
| DH-α-QT<br>(acetone-d <sub>6</sub> ) | 0.1916                             | 2.8180                                                 | 1.6711                                                 | 1.3368                                                   | 0.8889                                    |
|                                      | 0.0314                             | 2.8406                                                 | 1.6897                                                 | 1.3522                                                   | 0.8978                                    |
|                                      | <b>Δδ / ppm</b>                    | <b>0.0226</b>                                          | <b>0.0186</b>                                          | <b>0.0154</b>                                            | <b>0.0089</b>                             |
| DD-α-QT<br>(CDCl <sub>3</sub> )      | 0.1868                             | 2.7685                                                 | 1.6406                                                 | 1.2478                                                   | 0.8689                                    |
|                                      | 0.0312                             | 2.7764                                                 | 1.6475                                                 | 1.2505                                                   | 0.8711                                    |
|                                      | <b>Δδ / ppm</b>                    | <b>0.0079</b>                                          | <b>0.0069</b>                                          | <b>0.0027</b>                                            | <b>0.0022</b>                             |

<sup>a</sup> Respecting the protons of the first CH<sub>2</sub> group of the alkyl chain relative to the α-quaterthiophene unit.

<sup>b</sup> Respecting the protons of the second CH<sub>2</sub> group of the alkyl chain.

<sup>c</sup> Respecting the protons of the others CH<sub>2</sub> groups of the chain. NMR signal is an unresolved multiplet.

<sup>d</sup> Respecting the protons of the final CH<sub>3</sub> group of the alkyl chain.

In our analysis we deal mainly with variations in the chemical shifts, Δδ, between spectra recorded at very similar conditions and during the same experimental run; for instance, figure 3 in the manuscript presents Δδ = *f* ([OT]). Hence, despite each individual chemical shift cannot be known to such accuracy (as implied by the quantity of significant figures in the reported chemical shifts in these tables) its variation with concentration under the same conditions can, and using this data with less significant figures in the non-linear fitting used to determine *K*<sub>ass</sub> (see experimental section) would result in significant discrepancies in the calculated values.

#### - Calculation of uncertainties in *K*<sub>ass</sub> and Δ<sub>ass</sub>*G*<sub>m</sub><sup>0</sup>

The final result of *K*<sub>ass</sub> is presented as <*K*<sub>ass</sub>> ± σ<sub>m</sub>(*K*<sub>ass</sub>), where σ<sub>m</sub>(*K*<sub>ass</sub>) is the standard deviation of the mean, calculated as:

$$\sigma_m(K_{\text{ass}}) = \sigma(K_{\text{ass}}) / n^{1/2} \quad (\text{S1.1})$$

where σ(*K*<sub>ass</sub>) is the corrected sample standard deviation, and *n* is the number of concordant values used for the calculation of <*K*<sub>ass</sub>>.

The error of  $\Delta_{\text{ass}}G_{\text{m}}^0$  was calculated by applying the formulas of propagation of uncertainty to the equation:  $\Delta_{\text{ass}}G_{\text{m}}^0 = -R \cdot T \cdot \ln(K_{\text{ass}})$ , resulting in the following expression for  $\sigma(\Delta_{\text{ass}}G_{\text{m}}^0)$ :

$$\sigma(\Delta_{\text{ass}}G_{\text{m}}^0) = R \cdot T \cdot (\sigma_{\text{m}}(K_{\text{ass}}) / \langle K_{\text{ass}} \rangle) \quad (\text{S1.2})$$

Since only one value of  $K_{\text{ass}}$  could be determined for thiophene in acetone-d<sub>6</sub>,  $\sigma_{\text{m}}(K_{\text{ass}})$  was considered to be 0.040, taken as the value of  $\sigma_{\text{m}}(K_{\text{ass}})$  that corresponds to the maximum  $\%(\text{error})(\Delta_{\text{ass}}G_{\text{m}}^0)$  obtained for all the compounds studied, where:  $\%(\text{error})(\Delta_{\text{ass}}G_{\text{m}}^0) = \sigma(\Delta_{\text{ass}}G_{\text{m}}^0) / (\Delta_{\text{ass}}G_{\text{m}}^0) \cdot 100$ .

## Section S2. Computational details

**Table S28.** Electronic energies for the two conformations of 2,2'-bithiophene obtained with the G3 computational method.

| 2,2'-Bithiophene conformer | $\frac{E_{el}(G3)}{\text{hartree}}$ |
|----------------------------|-------------------------------------|
| <i>Syn-gauche</i>          | -1104.313528                        |
| <i>Anti-gauche</i>         | -1104.314134                        |

**Table S29.** Electronic energies (corrected for BSSE by the counterpoise method),  $E_{el}$ , used for the calculations of dimerization energies, obtained from the optimization at the B97D/6-31+G(d,p), MP2/cc-pVDZ//B97D/6-31+G(d,p) and M06-2X/6-31+G(d,p) levels of theory.

| Molecular system                    | $E_{el} / \text{hartree}$ |              |              |
|-------------------------------------|---------------------------|--------------|--------------|
|                                     | B97D                      | MP2//B97D    | M06-2X       |
| Thiophene                           | -552.8931814              | -551.9837451 | -552.9071702 |
| Thiophene dimer A                   | -1105.789439              | -1103.969516 | ---          |
| Thiophene dimer B                   | -1105.789728              | -1103.970106 | ---          |
| Thiophene dimer C                   | -1105.789866              | -1103.970142 | ---          |
| Thiophene dimer D                   | -1105.788133              | -1103.969333 | ---          |
| Thiophene dimer E                   | -1105.790058              | -1103.970163 | ---          |
| Thiophene dimer F                   | -1105.791146              | -1103.971581 | -1105.819740 |
| Thiophene dimer G                   | -1105.790743              | -1103.970981 | ---          |
| Thiophene dimer H                   | -1105.790709              | -1103.970845 | ---          |
| 2,2'-Bithiophene                    | -1104.594131              | -1102.806987 | -1104.635105 |
| 2,2'-Bithiophene parallel dimer     | -2209.199192              | -2205.626251 | -2209.284684 |
| 2,2'-Bithiophene antiparallel dimer | -2209.198006              | -2205.62356  | -2209.283753 |
| 3,3'-Bithiophene                    | -1104.593809              | -1102.804743 | -1104.634743 |
| 3,3'-Bithiophene parallel dimer     | -2209.199960              | -2205.623177 | -2209.285318 |
| 3,3'-Bithiophene antiparallel dimer | -2209.198738              | -2205.620666 | -2209.283504 |

|                                                 |              |              |              |
|-------------------------------------------------|--------------|--------------|--------------|
| 2,2';5',2''-Terthiophene                        | -1656.296336 | -1653.631579 | -1656.363640 |
| 2,2';5',2''-Terthiophene<br>parallel dimer      | -3312.608352 | -3307.280853 | -3312.746335 |
| 2,2';5',2''-Terthiophene<br>antiparallel dimer  | -3312.607654 | -3307.279939 | -3312.746046 |
| 3,2';5',3''-Terthiophene                        | -1656.294509 | -1653.629663 | -1656.362690 |
| 3,2';5',3''-Terthiophene<br>parallel dimer      | -3312.605186 | -3307.275077 | -3312.743923 |
| 3,2';5',3''-Terthiophene<br>antiparallel dimer  | -3312.607654 | -3307.279929 | -3312.746038 |
| $\alpha$ -Quaterthiophene                       | -2207.998808 | -2204.456301 | -2208.092218 |
| $\alpha$ -Quaterthiophene parallel<br>dimer     | -4416.019219 | -4408.937509 | -4416.208641 |
| $\alpha$ -Quaterthiophene<br>antiparallel dimer | -4416.018258 | -4408.937203 | -4416.210133 |

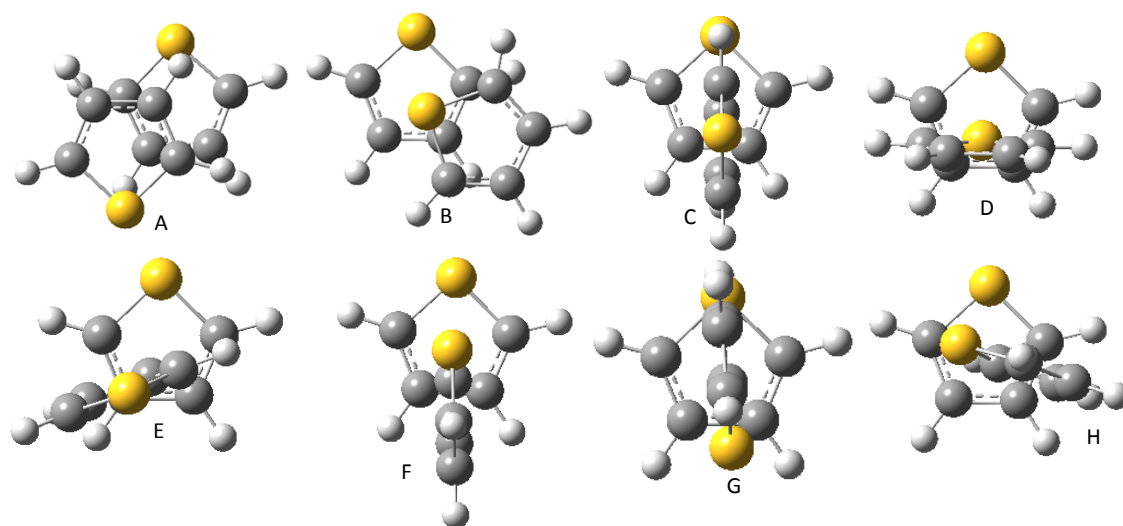

**Figure S27.** Graphical representation of the different dimers of thiophene optimized at the B97D/6-31+G(d,p) level of theory.

**Table S30.** Interaction energies,  $\Delta_{\text{int}}E_{\text{m}}$ , (corrected for BSSE) calculated at the B97D/6-31+G(d,p) level of theory using the PCM method for the parallel and anti-parallel dimers of thiophene, the bithiophenes, the terthiophenes and  $\alpha$ -quaterthiophene in acetone and chloroform solutions.

| Dimer                     |               | $\Delta_{\text{int}}E_{\text{m}} / \text{kJ}\cdot\text{mol}^{-1}$ |            |
|---------------------------|---------------|-------------------------------------------------------------------|------------|
|                           |               | acetone                                                           | chloroform |
| thiophene                 | <sup>a</sup>  | -12.4                                                             | -12.7      |
| 22-BT / 22-BT             | parallel      | -28.7                                                             | -30.3      |
|                           | anti-parallel | -27.5                                                             | -28.4      |
| 33-BT / 33-BT             | parallel      | -28.6                                                             | -31.5      |
|                           | anti-parallel | -28.6                                                             | -30.1      |
| 2252-TT / 2252-TT         | parallel      | -44.6                                                             | -45.9      |
|                           | anti-parallel | -42.9                                                             | -44.1      |
| 3253-TT / 3253-TT         | parallel      | -44.1                                                             | -45.7      |
|                           | anti-parallel | -49.0                                                             | -51.2      |
| $\alpha$ -quaterthiophene | parallel      | -61.7                                                             | -63.2      |
|                           | anti-parallel | -60.3                                                             | -61.6      |

<sup>a</sup> For thiophene  $\Delta_{\text{int}}E_{\text{m}}$  for the strongest interacting dimer is shown.

**Table S31.** Electronic energies used for the calculations of dimerization energies, obtained from the optimization at the B97D/6-31+G(d,p) level of theory with counterpoise correction followed by a single point energy calculation at the same level of theory using the PCM method as the self-consistent reaction field.

| Molecular system                        | $E_{\text{el}}(\text{B97D/6-31+G(d,p)/PCM(chloroform)})$ | $E_{\text{el}}(\text{B97D/6-31+G(d,p)/PCM(acetone)})$ |
|-----------------------------------------|----------------------------------------------------------|-------------------------------------------------------|
|                                         | hartree                                                  | hartree                                               |
| Thiophene                               | -552.895349                                              | -552.8960815                                          |
| Thiophene dimer F                       | -1105.79554                                              | -1105.796874                                          |
| 2,2'-Bithiophene                        | -1104.597301                                             | -1104.598495                                          |
| 2,2'-Bithiophene parallel dimer         | -2209.206151                                             | -2209.207911                                          |
| 2,2'-Bithiophene antiparallel dimer     | -2209.205402                                             | -2209.207470                                          |
| 3,3'-Bithiophene                        | -1104.597607                                             | -1104.599067                                          |
| 3,3'-Bithiophene parallel dimer         | -2209.207217                                             | -2209.209032                                          |
| 3,3'-Bithiophene antiparallel dimer     | -2209.206661                                             | -2209.209034                                          |
| 2,2';5',2''-Terthiophene                | -1656.300502                                             | -1656.302092                                          |
| 2,2';5',2''-Terthiophene parallel dimer | -3312.618502                                             | -3312.621167                                          |



|                                                    |              |              |
|----------------------------------------------------|--------------|--------------|
| 2,2';5',2''-<br>Terthiophene<br>antiparallel dimer | -3312.617808 | -3312.620524 |
| 3,2';5',3''-<br>Terthiophene                       | -1656.299146 | -1656.300929 |
| 3,2';5',3''-<br>Terthiophene parallel<br>dimer     | -3312.615691 | -3312.618668 |
| 3,2';5',3''-<br>Terthiophene<br>antiparallel dimer | -3312.617806 | -3312.620521 |
| $\alpha$ -Quaterthiophene                          | -2208.003989 | -2208.005978 |
| $\alpha$ -Quaterthiophene<br>parallel dimer        | -4416.032057 | -4416.035457 |
| $\alpha$ -Quaterthiophene<br>antiparallel dimer    | -4416.031445 | -4416.034923 |

**Table S32.** Electronic energies used for the calculations of dimerization energies, obtained from the optimization at the B97D/6-31+G(g,p) level of theory with counterpoise correction followed by fundamental vibrational frequencies calculations at the same level of theory.

| Molecular system                         | $\frac{E_{0K}(\text{B97D/6-31+G(d,p)} + \text{ZPE})}{\text{hartree}}$ |
|------------------------------------------|-----------------------------------------------------------------------|
| Thiophene                                | -552.8283414                                                          |
| Thiophene dimer F                        | -1105.660854                                                          |
| 2,2'-Bithiophene                         | -1104.483407                                                          |
| 2,2'-Bithiophene parallel dimer          | -2208.977128                                                          |
| 2,2';5',2''-Terthiophene                 | -1656.139894                                                          |
| 2,2';5',2''-Terthiophene parallel dimer  | -3312.294120                                                          |
| $\alpha$ -Quaterthiophene                | -2207.796741                                                          |
| $\alpha$ -Quaterthiophene parallel dimer | -4415.613417                                                          |

**Table S33.** Mean  $^1\text{H}$ -NMR chemical shifts of all protons of the different monomers and dimers calculated with the B97D/6-31+G(d,p)/GIAO computational method using TMS as a reference.

| Monomer / Dimer                          | Mean $\delta_{\text{H}}$ |
|------------------------------------------|--------------------------|
| Thiophene                                | 7.20                     |
| Thiophene dimer                          | 6.61                     |
| 22-BT                                    | 7.01                     |
| 22-BT dimer parallel                     | 6.45                     |
| 33-BT                                    | 7.28                     |
| 33-BT dimer parallel                     | 6.56                     |
| 2252-TT                                  | 6.98                     |
| 2252-TT dimer parallel                   | 6.70                     |
| 3253-TT                                  | 7.19                     |
| 3253-TT dimer antiparallel               | 6.64                     |
| $\alpha$ -quaterthiophene                | 6.95                     |
| $\alpha$ -quaterthiophene dimer parallel | 6.64                     |

**Table S34.** Cartesian coordinates of the optimized structures of thiophene dimer A using B97D/6-31+G(d,p) with counterpoise correction.

| Center number | Atomic number | Atomic type | Coordinates (Angstroms) |            |            |
|---------------|---------------|-------------|-------------------------|------------|------------|
|               |               |             | X                       | Y          | Z          |
| 1             | 6             | 0           | 2.0114540               | 1.0565600  | -0.6227710 |
| 2             | 6             | 0           | 1.1297770               | 0.0606020  | -0.9848790 |
| 3             | 6             | 0           | 1.5429960               | -1.2336570 | -0.5295100 |
| 4             | 6             | 0           | 2.7294120               | -1.1991400 | 0.1732890  |
| 5             | 16            | 0           | 3.3564920               | 0.4216470  | 0.2830300  |
| 6             | 1             | 0           | 1.9474080               | 2.1217510  | -0.8274280 |
| 7             | 1             | 0           | 0.2100450               | 0.2482170  | -1.5352930 |
| 8             | 1             | 0           | 0.9820450               | -2.1490780 | -0.7102170 |
| 9             | 1             | 0           | 3.2711500               | -2.0240630 | 0.6280370  |
| 10            | 6             | 0           | -2.1186770              | -1.0528810 | 0.7074020  |
| 11            | 6             | 0           | -1.4234120              | -0.0393980 | 1.3312340  |
| 12            | 6             | 0           | -1.7155360              | 1.2508260  | 0.7808850  |
| 13            | 6             | 0           | -2.6262470              | 1.1955230  | -0.2532970 |
| 14            | 16            | 0           | -3.1375310              | -0.4396310 | -0.5645590 |
| 15            | 1             | 0           | -2.0866660              | -2.1194860 | 0.9119450  |
| 16            | 1             | 0           | -0.7136420              | -0.2119020 | 2.1382480  |
| 17            | 1             | 0           | -1.2650340              | 2.1783010  | 1.1307570  |
| 18            | 1             | 0           | -3.0272960              | 2.0134010  | -0.8457120 |

**Table S35.** Cartesian coordinates of the optimized structures of thiophene dimer B using B97D/6-31+G(d,p) with counterpoise correction.

| Center number | Atomic number | Atomic type | Coordinates (Angstroms) |            |            |
|---------------|---------------|-------------|-------------------------|------------|------------|
|               |               |             | X                       | Y          | Z          |
| 1             | 6             | 0           | -1.4418610              | -0.7530960 | -1.0489620 |
| 2             | 6             | 0           | -1.1912060              | 0.5773040  | -1.3040670 |
| 3             | 6             | 0           | -1.8510800              | 1.4505320  | -0.3794580 |
| 4             | 6             | 0           | -2.5908210              | 0.7682520  | 0.5637260  |
| 5             | 16            | 0           | -2.4881190              | -0.9532630 | 0.3270110  |
| 6             | 1             | 0           | -1.0600380              | -1.6237610 | -1.5740840 |
| 7             | 1             | 0           | -0.5415350              | 0.9169750  | -2.1083150 |
| 8             | 1             | 0           | -1.7788550              | 2.5369040  | -0.4084550 |
| 9             | 1             | 0           | -3.1916170              | 1.1717330  | 1.3742560  |
| 10            | 6             | 0           | 2.5920950               | 0.7636370  | -0.5669050 |
| 11            | 6             | 0           | 1.8554950               | 1.4510840  | 0.3749720  |
| 12            | 6             | 0           | 1.1941080               | 0.5827770  | 1.3031720  |
| 13            | 6             | 0           | 1.4403550               | -0.7491410 | 1.0519370  |
| 14            | 16            | 0           | 2.4846420               | -0.9567830 | -0.3245260 |
| 15            | 1             | 0           | 3.1941170               | 1.1632420  | -1.3784560 |
| 16            | 1             | 0           | 1.7864950               | 2.5377500  | 0.4001030  |
| 17            | 1             | 0           | 0.5468810               | 0.9267620  | 2.1075670  |
| 18            | 1             | 0           | 1.0576720               | -1.6169680 | 1.5811310  |

**Table S36.** Cartesian coordinates of the optimized structures of thiophene dimer C using B97D/6-31+G(d,p) with counterpoise correction.

| Center number | Atomic number | Atomic type | Coordinates (Angstroms) |            |            |
|---------------|---------------|-------------|-------------------------|------------|------------|
|               |               |             | X                       | Y          | Z          |
| 1             | 6             | 0           | 2.5626790               | 0.0255890  | 1.2497370  |
| 2             | 6             | 0           | 2.3561690               | 1.2876750  | 0.7336870  |
| 3             | 6             | 0           | 2.3592950               | 1.3062690  | -0.7001450 |
| 4             | 6             | 0           | 2.5680020               | 0.0579550  | -1.2479170 |
| 5             | 16            | 0           | 2.7678050               | -1.1533540 | -0.0141120 |
| 6             | 1             | 0           | 2.6037380               | -0.2801510 | 2.2914290  |
| 7             | 1             | 0           | 2.2056680               | 2.1680620  | 1.3569180  |
| 8             | 1             | 0           | 2.2117370               | 2.2025820  | -1.3009970 |
| 9             | 1             | 0           | 2.6139570               | -0.2207470 | -2.2969630 |
| 10            | 6             | 0           | -2.4723560              | -1.2786350 | 0.0037060  |
| 11            | 6             | 0           | -1.2397800              | -0.6594790 | 0.0016310  |
| 12            | 6             | 0           | -1.3400760              | 0.7706700  | -0.0035770 |
| 13            | 6             | 0           | -2.6465650              | 1.2129350  | -0.0054470 |
| 14            | 16            | 0           | -3.7701650              | -0.1174850 | -0.0006750 |
| 15            | 1             | 0           | -2.6953540              | -2.3421650 | 0.0075180  |
| 16            | 1             | 0           | -0.2946180              | -1.1993170 | 0.0036810  |
| 17            | 1             | 0           | -0.4761830              | 1.4321850  | -0.0057860 |
| 18            | 1             | 0           | -3.0153910              | 2.2351050  | -0.0092740 |

**Table S37.** Cartesian coordinates of the optimized structures of thiophene dimer D using B97D/6-31+G(d,p) with counterpoise correction.

| Center number | Atomic number | Atomic type | Coordinates (Angstroms) |            |            |
|---------------|---------------|-------------|-------------------------|------------|------------|
|               |               |             | X                       | Y          | Z          |
| 1             | 6             | 0           | -2.4512930              | 1.2504560  | -0.0109620 |
| 2             | 6             | 0           | -2.3172880              | 0.7404180  | 1.2639650  |
| 3             | 6             | 0           | -2.3268790              | -0.6923840 | 1.2892980  |
| 4             | 6             | 0           | -2.4681200              | -1.2452740 | 0.0331980  |
| 5             | 16            | 0           | -2.5909380              | -0.0178530 | -1.1932610 |
| 6             | 1             | 0           | -2.4778360              | 2.2907890  | -0.3232630 |
| 7             | 1             | 0           | -2.2128150              | 1.3662640  | 2.1491980  |
| 8             | 1             | 0           | -2.2300470              | -1.2879310 | 2.1959850  |
| 9             | 1             | 0           | -2.5079510              | -2.2955830 | -0.2422780 |
| 10            | 6             | 0           | 2.4507430               | 1.2442150  | -0.0078420 |
| 11            | 6             | 0           | 3.7269430               | 0.7320390  | -0.1270170 |
| 12            | 6             | 0           | 3.7474750               | -0.7012620 | -0.1224800 |
| 13            | 6             | 0           | 2.4863960               | -1.2489150 | -0.0002610 |
| 14            | 16            | 0           | 1.2611590               | -0.0191610 | 0.1112180  |
| 15            | 1             | 0           | 2.1414030               | 2.2856430  | 0.0152810  |
| 16            | 1             | 0           | 4.6153330               | 1.3562050  | -0.2147510 |
| 17            | 1             | 0           | 4.6533760               | -1.3003200 | -0.2061130 |
| 18            | 1             | 0           | 2.2071230               | -2.2986070 | 0.0312380  |

**Table S38.** Cartesian coordinates of the optimized structures of thiophene dimer E using B97D/6-31+G(d,p) with counterpoise correction.

| Center number | Atomic number | Atomic type | Coordinates (Angstroms) |            |            |
|---------------|---------------|-------------|-------------------------|------------|------------|
|               |               |             | X                       | Y          | Z          |
| 1             | 6             | 0           | 2.5073830               | -1.2411880 | 0.1375060  |
| 2             | 6             | 0           | 2.3246050               | -0.5916700 | 1.3411290  |
| 3             | 6             | 0           | 2.3625250               | 0.8349220  | 1.2092400  |
| 4             | 6             | 0           | 2.5728740               | 1.2427890  | -0.0922150 |
| 5             | 16            | 0           | 2.7252290               | -0.1144330 | -1.1694650 |
| 6             | 1             | 0           | 2.5295270               | -2.3100960 | -0.0566840 |
| 7             | 1             | 0           | 2.1675310               | -1.1139880 | 2.2836650  |
| 8             | 1             | 0           | 2.2385300               | 1.5286500  | 2.0395110  |
| 9             | 1             | 0           | 2.6480150               | 2.2552250  | -0.4794970 |
| 10            | 6             | 0           | -2.5691310              | -1.2481130 | 0.0252640  |
| 11            | 6             | 0           | -1.2867310              | -0.7501140 | 0.1247330  |
| 12            | 6             | 0           | -1.2437980              | 0.6823140  | 0.0795520  |
| 13            | 6             | 0           | -2.4950340              | 1.2474040  | -0.0533280 |
| 14            | 16            | 0           | -3.7403280              | 0.0320530  | -0.1245930 |
| 15            | 1             | 0           | -2.8954180              | -2.2846310 | 0.0301860  |
| 16            | 1             | 0           | -0.4003390              | -1.3733920 | 0.2267100  |
| 17            | 1             | 0           | -0.3226170              | 1.2586570  | 0.1438340  |
| 18            | 1             | 0           | -2.7598070              | 2.2995960  | -0.1140840 |

**Table S39.** Cartesian coordinates of the optimized structures of thiophene dimer F using B97D/6-31+G(d,p) with counterpoise correction.

| Center number | Atomic number | Atomic type | Coordinates (Angstroms) |            |            |
|---------------|---------------|-------------|-------------------------|------------|------------|
|               |               |             | X                       | Y          | Z          |
| 1             | 16            | 0           | -2.4883920              | 0.2563170  | -1.1577380 |
| 2             | 6             | 0           | -2.6447260              | 1.1198280  | 0.3449040  |
| 3             | 6             | 0           | -1.9568820              | -1.1808880 | -0.3351460 |
| 4             | 6             | 0           | -2.3043340              | 0.3264950  | 1.4219820  |
| 5             | 1             | 0           | -2.9807800              | 2.1530890  | 0.3467930  |
| 6             | 6             | 0           | -1.9088890              | -0.9947380 | 1.0309790  |
| 7             | 1             | 0           | -1.7036640              | -2.0706890 | -0.9044210 |
| 8             | 1             | 0           | -2.3313870              | 0.6762950  | 2.4528920  |
| 9             | 1             | 0           | -1.5933150              | -1.7697970 | 1.7274780  |
| 10            | 1             | 0           | 0.1587560               | 0.8201670  | 0.3548590  |
| 11            | 6             | 0           | 1.2115090               | 0.6099110  | 0.1911950  |
| 12            | 6             | 0           | 2.2674170               | 1.4922520  | 0.0972160  |
| 13            | 16            | 0           | 1.7451130               | -1.0367810 | 0.0154260  |
| 14            | 6             | 0           | 3.5242540               | 0.8356310  | -0.1190040 |
| 15            | 1             | 0           | 2.1486310               | 2.5719650  | 0.1795960  |
| 16            | 6             | 0           | 3.4011560               | -0.5369480 | -0.1852570 |
| 17            | 1             | 0           | 4.4763830               | 1.3549860  | -0.2211050 |
| 18            | 1             | 0           | 4.1808150               | -1.2778580 | -0.3402980 |

**Table S40.** Cartesian coordinates of the optimized structures of thiophene dimer G using B97D/6-31+G(d,p) with counterpoise correction.

| Center number | Atomic number | Atomic type | Coordinates (Angstroms) |            |            |
|---------------|---------------|-------------|-------------------------|------------|------------|
|               |               |             | X                       | Y          | Z          |
| 1             | 6             | 0           | 2.4023030               | -0.0547750 | 1.2523230  |
| 2             | 6             | 0           | 2.3540050               | 1.2474760  | 0.7995120  |
| 3             | 6             | 0           | 2.3770000               | 1.3358450  | -0.6315870 |
| 4             | 6             | 0           | 2.4422560               | 0.0988690  | -1.2394410 |
| 5             | 16            | 0           | 2.4797050               | -1.1861030 | -0.0671110 |
| 6             | 1             | 0           | 2.3907130               | -0.4141210 | 2.2774710  |
| 7             | 1             | 0           | 2.2988810               | 2.1077200  | 1.4649100  |
| 8             | 1             | 0           | 2.3428160               | 2.2715560  | -1.1876250 |
| 9             | 1             | 0           | 2.4662060               | -0.1319180 | -2.3007580 |
| 10            | 6             | 0           | -3.6720050              | -0.0815170 | 0.0116260  |
| 11            | 6             | 0           | -3.0791270              | -1.3273350 | 0.0230520  |
| 12            | 6             | 0           | -1.6467680              | -1.2583450 | 0.0028550  |
| 13            | 6             | 0           | -1.1742440              | 0.0370650  | -0.0235110 |
| 14            | 16            | 0           | -2.4801540              | 1.1873880  | -0.0238530 |
| 15            | 1             | 0           | -4.7304490              | 0.1639420  | 0.0217470  |
| 16            | 1             | 0           | -3.6468390              | -2.2567990 | 0.0450340  |
| 17            | 1             | 0           | -0.9899590              | -2.1268800 | 0.0074200  |
| 18            | 1             | 0           | -0.1447100              | 0.3822310  | -0.0417470 |

**Table S41.** Cartesian coordinates of the optimized structures of thiophene dimer H using B97D/6-31+G(d,p) with counterpoise correction.

| Center number | Atomic number | Atomic type | Coordinates (Angstroms) |            |            |
|---------------|---------------|-------------|-------------------------|------------|------------|
|               |               |             | X                       | Y          | Z          |
| 1             | 6             | 0           | 2.4808580               | -1.1106470 | 0.5007660  |
| 2             | 6             | 0           | 2.3848660               | -0.0989150 | 1.4349090  |
| 3             | 6             | 0           | 2.2925970               | 1.1995100  | 0.8340240  |
| 4             | 6             | 0           | 2.3208750               | 1.1495930  | -0.5445210 |
| 5             | 16            | 0           | 2.4625570               | -0.4843480 | -1.1221020 |
| 6             | 1             | 0           | 2.5637340               | -2.1806670 | 0.6703990  |
| 7             | 1             | 0           | 2.3762200               | -0.2777180 | 2.5090510  |
| 8             | 1             | 0           | 2.2040740               | 2.1279370  | 1.3961870  |
| 9             | 1             | 0           | 2.2610970               | 1.9722600  | -1.2516150 |
| 10            | 6             | 0           | -3.6266960              | -0.1097040 | -0.2051520 |
| 11            | 6             | 0           | -3.1831700              | 1.1962170  | -0.2438340 |
| 12            | 6             | 0           | -1.7788500              | 1.3108790  | 0.0237260  |
| 13            | 6             | 0           | -1.1782780              | 0.0923800  | 0.2617170  |
| 14            | 16            | 0           | -2.3275710              | -1.2100210 | 0.1598340  |
| 15            | 1             | 0           | -4.6323690              | -0.4873590 | -0.3684310 |
| 16            | 1             | 0           | -3.8370300              | 2.0412690  | -0.4560910 |
| 17            | 1             | 0           | -1.2322240              | 2.2526870  | 0.0388450  |
| 18            | 1             | 0           | -0.1364940              | -0.1143700 | 0.4881180  |

**Table S42.** Cartesian coordinates of the optimized structures of 2,2'-bithiophene parallel dimer using B97D/6-31+G(d,p) with counterpoise correction.

| Center number | Atomic number | Atomic type | Coordinates (Angstroms) |            |            |
|---------------|---------------|-------------|-------------------------|------------|------------|
|               |               |             | X                       | Y          | Z          |
| 1             | 6             | 0           | -1.4015390              | 0.3773280  | -3.0073990 |
| 2             | 6             | 0           | -1.3268160              | 0.8662270  | -1.6680810 |
| 3             | 1             | 0           | -1.1034060              | 0.9532490  | -3.8822540 |
| 4             | 6             | 0           | -1.8733510              | -0.9185280 | -3.0801310 |
| 5             | 6             | 0           | -1.7373480              | -0.0618350 | -0.7230270 |
| 6             | 1             | 0           | -0.9313710              | 1.8407060  | -1.3879390 |
| 7             | 1             | 0           | -2.0283230              | -1.5312100 | -3.9642480 |
| 8             | 16            | 0           | -2.2512290              | -1.5509600 | -1.5048410 |
| 9             | 6             | 0           | -1.7362870              | 0.0610350  | 0.7254360  |
| 10            | 6             | 0           | -1.3240820              | -0.8668030 | 1.6699830  |
| 11            | 16            | 0           | -2.2494150              | 1.5501120  | 1.5078670  |
| 12            | 6             | 0           | -1.3968300              | -0.3777030 | 3.0093480  |
| 13            | 1             | 0           | -0.9290690              | -1.8413290 | 1.3894490  |
| 14            | 6             | 0           | -1.8688480              | 0.9180560  | 3.0826210  |
| 15            | 1             | 0           | -1.0973190              | -0.9534120 | 3.8838640  |
| 16            | 1             | 0           | -2.0228060              | 1.5307460  | 3.9669200  |
| 17            | 1             | 0           | 2.0238150               | 3.9659350  | -1.5323470 |
| 18            | 6             | 0           | 1.8696980               | 3.0816970  | -0.9196210 |
| 19            | 6             | 0           | 1.3987890               | 3.0086590  | 0.3765430  |
| 20            | 16            | 0           | 2.2487630               | 1.5067200  | -1.5520980 |
| 21            | 6             | 0           | 1.3257050               | 1.6693290  | 0.8656350  |
| 22            | 1             | 0           | 1.1002690               | 3.8833200  | 0.9525540  |
| 23            | 6             | 0           | 1.7366670               | 0.7245800  | -0.0625250 |
| 24            | 1             | 0           | 0.9312740               | 1.3889340  | 1.8404280  |
| 25            | 6             | 0           | 1.7368760               | -0.7238880 | 0.0603660  |

|    |    |   |           |            |            |
|----|----|---|-----------|------------|------------|
| 26 | 6  | 0 | 1.3247620 | -1.6687340 | -0.8671890 |
| 27 | 16 | 0 | 2.2521210 | -1.5059890 | 1.5488830  |
| 28 | 6  | 0 | 1.3993330 | -3.0081050 | -0.3784060 |
| 29 | 1  | 0 | 0.9285580 | -1.3883720 | -1.8412690 |
| 30 | 6  | 0 | 1.8726690 | -3.0810820 | 0.9168770  |
| 31 | 1  | 0 | 1.1001480 | -3.8828060 | -0.9540180 |
| 32 | 1  | 0 | 2.0280110 | -3.9653060 | 1.5293170  |

**Table S43.** Cartesian coordinates of the optimized structures of 2,2'-bithiophene antiparallel dimer using B97D/6-31+G(d,p) with counterpoise correction.

| Center number | Atomic number | Atomic type | Coordinates (Angstroms) |            |            |
|---------------|---------------|-------------|-------------------------|------------|------------|
|               |               |             | X                       | Y          | Z          |
| 1             | 6             | 0           | -3.0483340              | -1.7079140 | -0.2319680 |
| 2             | 6             | 0           | -1.8532950              | -1.6901400 | 0.5441480  |
| 3             | 1             | 0           | -4.0488040              | -1.6735360 | 0.1957320  |
| 4             | 6             | 0           | -2.8059640              | -1.7574390 | -1.5884650 |
| 5             | 6             | 0           | -0.6927530              | -1.7268120 | -0.2189620 |
| 6             | 1             | 0           | -1.8389520              | -1.6308230 | 1.6306480  |
| 7             | 16            | 0           | -1.1005350              | -1.7853050 | -1.9323140 |
| 8             | 1             | 0           | -3.5221260              | -1.7781890 | -2.4052990 |
| 9             | 6             | 0           | 0.6904190               | -1.7275200 | 0.2192240  |
| 10            | 6             | 0           | 1.8509920               | -1.6929510 | -0.5439380 |
| 11            | 16            | 0           | 1.0982020               | -1.7849490 | 1.9326610  |
| 12            | 6             | 0           | 3.0460310               | -1.7113150 | 0.2321560  |
| 13            | 1             | 0           | 1.8366930               | -1.6346450 | -1.6305010 |
| 14            | 6             | 0           | 2.8036410               | -1.7592750 | 1.5887010  |
| 15            | 1             | 0           | 4.0465250               | -1.6784110 | -0.1956050 |
| 16            | 1             | 0           | 3.5198090               | -1.7800180 | 2.4055260  |
| 17            | 6             | 0           | -0.6904180              | 1.7272370  | 0.2189940  |
| 18            | 6             | 0           | -1.8509980              | 1.6924160  | -0.5441500 |
| 19            | 6             | 0           | 0.6927470               | 1.7264970  | -0.2192150 |
| 20            | 16            | 0           | -1.0981500              | 1.7855570  | 1.9323530  |
| 21            | 6             | 0           | -3.0460200              | 1.7114200  | 0.2319550  |
| 22            | 1             | 0           | -1.8367200              | 1.6335550  | -1.6306800 |
| 23            | 6             | 0           | 1.8533080               | 1.6898310  | 0.5438660  |
| 24            | 16            | 0           | 1.1004810               | 1.7851080  | -1.9325850 |
| 25            | 6             | 0           | -2.8036040              | 1.7600340  | 1.5884670  |
| 26            | 1             | 0           | -4.0465330              | 1.6785180  | -0.1957630 |
| 27            | 6             | 0           | 3.0483290               | 1.7076560  | -0.2322780 |
| 28            | 1             | 0           | 1.8390030               | 1.6304900  | 1.6303640  |
| 29            | 6             | 0           | 2.8059230               | 1.7572460  | -1.5887610 |
| 30            | 1             | 0           | -3.5197480              | 1.7813310  | 2.4053020  |
| 31            | 1             | 0           | 4.0488110               | 1.6732780  | 0.1953970  |
| 32            | 1             | 0           | 3.5220580               | 1.7780620  | -2.4056180 |

**Table S44.** Cartesian coordinates of the optimized structures of 3,3'-bithiophene parallel dimer using B97D/6-31+G(d,p) with counterpoise correction.

| Center number | Atomic number | Atomic type | Coordinates (Angstroms) |            |            |
|---------------|---------------|-------------|-------------------------|------------|------------|
|               |               |             | X                       | Y          | Z          |
| 1             | 6             | 0           | -1.2646500              | 2.7588310  | 1.8998960  |
| 2             | 6             | 0           | -0.1804230              | 1.9202320  | 2.0093080  |
| 3             | 6             | 0           | -0.4890870              | 0.5491050  | 1.6949930  |
| 4             | 6             | 0           | -1.8215300              | 0.3891940  | 1.3546600  |
| 5             | 16            | 0           | -2.6931710              | 1.8895710  | 1.4063420  |
| 6             | 1             | 0           | -1.3163490              | 3.8254220  | 2.1005450  |
| 7             | 1             | 0           | 0.8096830               | 2.2534090  | 2.3149430  |
| 8             | 1             | 0           | -2.3115190              | -0.5151400 | 1.0080450  |
| 9             | 6             | 0           | 0.4914430               | -0.5463260 | 1.6952240  |
| 10            | 6             | 0           | 1.8234520               | -0.3868830 | 1.3529520  |
| 11            | 6             | 0           | 0.1832650               | -1.9169470 | 2.0121880  |
| 12            | 16            | 0           | 2.6952690               | -1.8870980 | 1.4061140  |
| 13            | 1             | 0           | 2.3129460               | 0.5169270  | 1.0042640  |
| 14            | 6             | 0           | 1.2674230               | -2.7556520 | 1.9028260  |
| 15            | 1             | 0           | -0.8064260              | -2.2497050 | 2.3196240  |
| 16            | 1             | 0           | 1.3194240               | -3.8219150 | 2.1051340  |
| 17            | 6             | 0           | 2.7563220               | 1.2635270  | -1.9039330 |
| 18            | 6             | 0           | 1.9171770               | 0.1796180  | -2.0123030 |
| 19            | 6             | 0           | 0.5466490               | 0.4886820  | -1.6957920 |
| 20            | 6             | 0           | 0.3877240               | 1.8211090  | -1.3549150 |
| 21            | 16            | 0           | 1.8883080               | 2.6922480  | -1.4087840 |
| 22            | 1             | 0           | 3.8226260               | 1.3148870  | -2.1061830 |
| 23            | 1             | 0           | 2.2495620               | -0.8105260 | -2.3186760 |
| 24            | 1             | 0           | -0.5159080              | 2.3113260  | -1.0067890 |
| 25            | 6             | 0           | -0.5491330              | -0.4914470 | -1.6944970 |
| 26            | 6             | 0           | -0.3895920              | -1.8236910 | -1.3531850 |
| 27            | 6             | 0           | -1.9202330              | -0.1825740 | -2.0087130 |
| 28            | 16            | 0           | -1.8902520              | -2.6948820 | -1.4039020 |
| 29            | 1             | 0           | 0.5147190               | -2.3137430 | -1.0066000 |
| 30            | 6             | 0           | -2.7591730              | -1.2664280 | -1.8982350 |
| 31            | 1             | 0           | -2.2531820              | 0.8074130  | -2.3149720 |
| 32            | 1             | 0           | -3.8258490              | -1.3178980 | -2.0984870 |



**Table S45.** Cartesian coordinates of the optimized structures of 3,3'-bithiophene antiparallel dimer using B97D/6-31+G(d,p) with counterpoise correction.

| Center number | Atomic number | Atomic type | Coordinates (Angstroms) |            |            |
|---------------|---------------|-------------|-------------------------|------------|------------|
|               |               |             | X                       | Y          | Z          |
| 1             | 6             | 0           | -3.0057720              | 1.7294270  | 0.4482840  |
| 2             | 6             | 0           | -1.9116160              | 1.7518520  | -0.3807060 |
| 3             | 6             | 0           | -0.6586340              | 1.6521890  | 0.3228180  |
| 4             | 6             | 0           | -0.8559210              | 1.5536900  | 1.6917350  |
| 5             | 16            | 0           | -2.5377920              | 1.5850710  | 2.1191080  |
| 6             | 1             | 0           | -4.0563050              | 1.7843490  | 0.1779710  |
| 7             | 1             | 0           | -1.9900240              | 1.8317030  | -1.4625000 |
| 8             | 1             | 0           | -0.1009910              | 1.4518330  | 2.4645570  |
| 9             | 6             | 0           | 0.6597920               | 1.6517320  | -0.3235490 |
| 10            | 6             | 0           | 0.8570480               | 1.5523800  | -1.6924110 |
| 11            | 6             | 0           | 1.9128090               | 1.7513060  | 0.3799230  |
| 12            | 16            | 0           | 2.5389340               | 1.5828860  | -2.1197940 |
| 13            | 1             | 0           | 0.1020820               | 1.4504070  | -2.4651830 |
| 14            | 6             | 0           | 3.0069600               | 1.7279990  | -0.4490500 |
| 15            | 1             | 0           | 1.9912380               | 1.8317280  | 1.4616730  |
| 16            | 1             | 0           | 4.0575120               | 1.7826730  | -0.1787620 |
| 17            | 6             | 0           | -3.0069640              | -1.7282060 | -0.4483190 |
| 18            | 6             | 0           | -1.9128290              | -1.7512810 | 0.3806790  |
| 19            | 6             | 0           | -0.6597940              | -1.6521240 | -0.3228170 |
| 20            | 6             | 0           | -0.8570150              | -1.5533610 | -1.6917270 |
| 21            | 16            | 0           | -2.5389000              | -1.5838650 | -2.1191220 |
| 22            | 1             | 0           | -4.0575260              | -1.7826490 | -0.1780230 |
| 23            | 1             | 0           | -1.9912800              | -1.8312510 | 1.4624620  |
| 24            | 1             | 0           | -0.1020300              | -1.4517570 | -2.4645280 |
| 25            | 6             | 0           | 0.6586200               | -1.6522200 | 0.3235660  |
| 26            | 6             | 0           | 0.8558920               | -1.5530120 | 1.6924340  |
| 27            | 6             | 0           | 1.9116130               | -1.7520300 | -0.3799140 |
| 28            | 16            | 0           | 2.5377780               | -1.5838540 | 2.1198090  |
| 29            | 1             | 0           | 0.1009530               | -1.4508920 | 2.4652130  |
| 30            | 6             | 0           | 3.0057680               | -1.7289640 | 0.4490530  |
| 31            | 1             | 0           | 1.9900210               | -1.8324250 | -1.4616670 |
| 32            | 1             | 0           | 4.0563080               | -1.7837980 | 0.1787530  |

**Table S46.** Cartesian coordinates of the optimized structures of 2,2';5',2''-terthiophene parallel dimer using B97D/6-31+G(d,p) with counterpoise correction.

| Center number | Atomic number | Atomic type | Coordinates (Angstroms) |            |            |
|---------------|---------------|-------------|-------------------------|------------|------------|
|               |               |             | X                       | Y          | Z          |
| 1             | 6             | 0           | 4.9573350               | -2.7773610 | -0.8285630 |
| 2             | 6             | 0           | 4.0459970               | -2.9762480 | -1.8463930 |
| 3             | 6             | 0           | 2.7121180               | -2.6353620 | -1.4702940 |
| 4             | 6             | 0           | 2.6063580               | -2.1742910 | -0.1617740 |
| 5             | 16            | 0           | 4.1867590               | -2.1875480 | 0.6156340  |
| 6             | 1             | 0           | 6.0306920               | -2.9461280 | -0.8404870 |
| 7             | 1             | 0           | 4.3248770               | -3.3423840 | -2.8334560 |
| 8             | 1             | 0           | 1.8540020               | -2.6908090 | -2.1383530 |
| 9             | 6             | 0           | 1.4335800               | -1.7021950 | 0.5451950  |
| 10            | 6             | 0           | 1.3505540               | -0.7357770 | 1.5396770  |
| 11            | 16            | 0           | -0.1704850              | -2.3087880 | 0.1454680  |
| 12            | 6             | 0           | 0.0234970               | -0.4587200 | 1.9514300  |
| 13            | 1             | 0           | 2.2245640               | -0.1995090 | 1.9031340  |
| 14            | 6             | 0           | -0.9412680              | -1.2077950 | 1.2854920  |
| 15            | 1             | 0           | -0.2319670              | 0.3027490  | 2.6853000  |
| 16            | 6             | 0           | -2.3807820              | -1.1683330 | 1.4277950  |
| 17            | 6             | 0           | -3.3559690              | -1.7725780 | 0.6422090  |
| 18            | 16            | 0           | -3.1394180              | -0.2529210 | 2.7305230  |
| 19            | 6             | 0           | -4.6862870              | -1.5050040 | 1.0763010  |
| 20            | 1             | 0           | -3.1149090              | -2.3626780 | -0.2389780 |
| 21            | 6             | 0           | -4.7336770              | -0.6952230 | 2.1919990  |
| 22            | 1             | 0           | -5.5746320              | -1.8839060 | 0.5742270  |
| 23            | 1             | 0           | -5.6052290              | -0.3271290 | 2.7260930  |
| 24            | 6             | 0           | 4.7010960               | 2.8811010  | 0.5314380  |
| 25            | 6             | 0           | 4.6531820               | 1.7242250  | -0.2194860 |
| 26            | 6             | 0           | 3.3246290               | 1.3445450  | -0.5716250 |
| 27            | 6             | 0           | 2.3536300               | 2.2167640  | -0.0898480 |
| 28            | 16            | 0           | 3.1104140               | 3.5340770  | 0.8053120  |
| 29            | 1             | 0           | 5.5710480               | 3.3899880  | 0.9374170  |
| 30            | 1             | 0           | 5.5381130               | 1.1541590  | -0.4970470 |
| 31            | 1             | 0           | 3.0778720               | 0.4389460  | -1.1225880 |
| 32            | 6             | 0           | 0.9149100               | 2.1313170  | -0.2221170 |
| 33            | 6             | 0           | -0.0803380              | 2.7271290  | 0.5478230  |
| 34            | 16            | 0           | 0.1955170               | 1.1264170  | -1.4701760 |
| 35            | 6             | 0           | -1.3940070              | 2.3553270  | 0.1665190  |
| 36            | 1             | 0           | 0.1447410               | 3.3787350  | 1.3908710  |
| 37            | 6             | 0           | -1.4342190              | 1.4680490  | -0.9050470 |
| 38            | 1             | 0           | -2.2919320              | 2.6849860  | 0.6861860  |
| 39            | 6             | 0           | -2.5771580              | 0.8398360  | -1.5308080 |
| 40            | 6             | 0           | -2.6096560              | -0.2536130 | -2.3913890 |
| 41            | 16            | 0           | -4.2109140              | 1.4229580  | -1.2327890 |
| 42            | 6             | 0           | -3.9267830              | -0.6207860 | -2.7938920 |
| 43            | 1             | 0           | -1.7090340              | -0.7855060 | -2.6933550 |
| 44            | 6             | 0           | -4.9002580              | 0.1881570  | -2.2427720 |
| 45            | 1             | 0           | -4.1496380              | -1.4537320 | -3.4593460 |
| 46            | 1             | 0           | -5.9774440              | 0.1361040  | -2.3743940 |

**Table S47.** Cartesian coordinates of the optimized structures of 2,2';5',2''-terthiophene antiparallel dimer using B97D/6-31+G(d,p) with counterpoise correction.

| Center number | Atomic number | Atomic type | Coordinates (Angstroms) |            |            |
|---------------|---------------|-------------|-------------------------|------------|------------|
|               |               |             | X                       | Y          | Z          |
| 1             | 6             | 0           | -0.0521520              | -2.4580100 | 1.1587960  |
| 2             | 6             | 0           | 1.3586250               | -2.3095200 | 1.1738820  |
| 3             | 1             | 0           | -0.6324040              | -2.8233350 | 2.0048610  |
| 4             | 6             | 0           | -0.6442430              | -2.0501250 | -0.0329750 |
| 5             | 6             | 0           | 1.8793470               | -1.7869520 | -0.0065880 |
| 6             | 1             | 0           | 1.9842350               | -2.5525370 | 2.0317270  |
| 7             | 16            | 0           | 0.5857890               | -1.5006430 | -1.1636720 |
| 8             | 6             | 0           | -2.0442880              | -2.0350680 | -0.4011910 |
| 9             | 6             | 0           | 3.2538530               | -1.4841210 | -0.3446050 |
| 10            | 6             | 0           | -2.6759640              | -1.3048100 | -1.4009090 |
| 11            | 16            | 0           | -3.2218970              | -3.0232090 | 0.4615740  |
| 12            | 6             | 0           | 3.7450060               | -0.6617240 | -1.3517360 |
| 13            | 16            | 0           | 4.5883530               | -2.1798570 | 0.5726890  |
| 14            | 6             | 0           | -4.0818570              | -1.5263810 | -1.4662110 |
| 15            | 1             | 0           | -2.1407650              | -0.5955040 | -2.0289320 |
| 16            | 6             | 0           | -4.5277640              | -2.4235000 | -0.5190490 |
| 17            | 6             | 0           | 5.1677390               | -0.5846610 | -1.3803200 |
| 18            | 1             | 0           | 3.0918640               | -0.1034750 | -2.0194840 |
| 19            | 6             | 0           | 5.7672580               | -1.3453850 | -0.3981330 |
| 20            | 1             | 0           | -4.7439320              | -1.0201720 | -2.1659910 |
| 21            | 1             | 0           | -5.5435900              | -2.7592340 | -0.3310690 |
| 22            | 1             | 0           | 5.7277490               | 0.0213570  | -2.0906420 |
| 23            | 1             | 0           | 6.8259390               | -1.4669500 | -0.1863810 |
| 24            | 1             | 0           | 2.1411700               | 0.5957540  | 2.0289100  |
| 25            | 6             | 0           | 2.6761930               | 1.3049990  | 1.4006740  |
| 26            | 6             | 0           | 2.0443540               | 2.0348380  | 0.4007490  |
| 27            | 6             | 0           | 4.0820250               | 1.5269560  | 1.4659810  |
| 28            | 6             | 0           | 0.6442580               | 2.0498470  | 0.0327280  |
| 29            | 16            | 0           | 3.2217770               | 3.0229830  | -0.4622880 |
| 30            | 6             | 0           | 4.5277480               | 2.4239050  | 0.5185720  |
| 31            | 1             | 0           | 4.7441840               | 1.0212010  | 2.1660120  |
| 32            | 6             | 0           | 0.0519350               | 2.4582250  | -1.1587670 |
| 33            | 16            | 0           | -0.5856070              | 1.5001240  | 1.1635070  |
| 34            | 1             | 0           | 5.5434980               | 2.7598370  | 0.3305270  |
| 35            | 6             | 0           | -1.3588620              | 2.3099510  | -1.1735810 |
| 36            | 1             | 0           | 0.6320250               | 2.8238280  | -2.0048240 |
| 37            | 6             | 0           | -1.8793980              | 1.7870780  | 0.0068370  |
| 38            | 1             | 0           | -1.9846280              | 2.5533680  | -2.0311990 |
| 39            | 6             | 0           | -3.2538680              | 1.4842310  | 0.3449980  |
| 40            | 6             | 0           | -3.7448900              | 0.6615770  | 1.3519850  |
| 41            | 16            | 0           | -4.5884950              | 2.1800830  | -0.5720340 |
| 42            | 6             | 0           | -5.1676130              | 0.5843690  | 1.3806330  |
| 43            | 1             | 0           | -3.0916550              | 0.1032380  | 2.0195680  |
| 44            | 6             | 0           | -5.7672630              | 1.3452750  | 0.3986680  |
| 45            | 1             | 0           | -5.7275200              | -0.0218730 | 2.0908440  |
| 46            | 1             | 0           | -6.8259690              | 1.4668370  | 0.1870430  |

**Table S48.** Cartesian coordinates of the optimized structures of 3,2';5',3''-terthiophene parallel dimer using B97D/6-31+G(d,p) with counterpoise correction.

| Center number | Atomic number | Atomic type | Coordinates (Angstroms) |            |            |
|---------------|---------------|-------------|-------------------------|------------|------------|
|               |               |             | X                       | Y          | Z          |
| 1             | 6             | 0           | -1.4081270              | -0.4913470 | 1.6514000  |
| 2             | 6             | 0           | -0.0970310              | -0.1035080 | 2.0250740  |
| 3             | 1             | 0           | -2.3031240              | 0.0632350  | 1.9241890  |
| 4             | 6             | 0           | -1.4471690              | -1.6106280 | 0.8309040  |
| 5             | 6             | 0           | 0.9012980               | -0.9133800 | 1.5006580  |
| 6             | 1             | 0           | 0.1204040               | 0.7746390  | 2.6280940  |
| 7             | 16            | 0           | 0.1831310               | -2.2000290 | 0.5411870  |
| 8             | 6             | 0           | -2.6148980              | -2.2453640 | 0.2276580  |
| 9             | 6             | 0           | 2.3462520               | -0.7766270 | 1.6489070  |
| 10            | 6             | 0           | -3.9177770              | -2.0300540 | 0.6634350  |
| 11            | 6             | 0           | -2.5840190              | -3.1332770 | -0.9104700 |
| 12            | 6             | 0           | 2.9475610               | 0.2026360  | 2.4305510  |
| 13            | 6             | 0           | 3.3324530               | -1.6035600 | 0.9973850  |
| 14            | 16            | 0           | -5.0818910              | -2.8821730 | -0.2981950 |
| 15            | 1             | 0           | -4.2414730              | -1.4256020 | 1.5047350  |
| 16            | 6             | 0           | -3.8314980              | -3.5554430 | -1.3048280 |
| 17            | 1             | 0           | -1.6673160              | -3.4271410 | -1.4194120 |
| 18            | 16            | 0           | 4.6775900               | 0.1190920  | 2.3720540  |
| 19            | 1             | 0           | 2.4588500               | 0.9610270  | 3.0336010  |
| 20            | 6             | 0           | 4.6244630               | -1.2441930 | 1.2914570  |
| 21            | 1             | 0           | 3.0849840               | -2.4182800 | 0.3203850  |
| 22            | 1             | 0           | -4.0893100              | -4.2127070 | -2.1304800 |
| 23            | 1             | 0           | 5.5451520               | -1.6857660 | 0.9226530  |
| 24            | 1             | 0           | -3.0349530              | 0.3755380  | -0.8265350 |
| 25            | 6             | 0           | -3.2932440              | 1.3788280  | -0.4946650 |
| 26            | 6             | 0           | -2.3183750              | 2.4059800  | -0.2149710 |
| 27            | 6             | 0           | -4.5847800              | 1.7784200  | -0.2468110 |
| 28            | 6             | 0           | -2.9233560              | 3.5718760  | 0.2390170  |
| 29            | 6             | 0           | -0.8735790              | 2.2420140  | -0.3505110 |
| 30            | 16            | 0           | -4.6489110              | 3.4187550  | 0.3351460  |
| 31            | 1             | 0           | -5.4979320              | 1.2008670  | -0.3602340 |
| 32            | 1             | 0           | -2.4419390              | 4.5120990  | 0.4909090  |
| 33            | 6             | 0           | 0.1413530               | 2.9025020  | 0.3310110  |
| 34            | 16            | 0           | -0.1902270              | 1.0638620  | -1.4521320 |
| 35            | 6             | 0           | 1.4439190               | 2.4515770  | -0.0101570 |
| 36            | 1             | 0           | -0.0637040              | 3.6541320  | 1.0920780  |
| 37            | 6             | 0           | 1.4514100               | 1.4383030  | -0.9601600 |
| 38            | 1             | 0           | 2.3561730               | 2.8148330  | 0.4592620  |
| 39            | 6             | 0           | 2.5955580               | 0.7236430  | -1.5168770 |
| 40            | 6             | 0           | 3.9089530               | 1.1608840  | -1.4001500 |
| 41            | 6             | 0           | 2.5208800               | -0.5233190 | -2.2393900 |
| 42            | 16            | 0           | 5.0311960               | 0.0738740  | -2.1464890 |
| 43            | 1             | 0           | 4.2654420               | 2.0653910  | -0.9178650 |
| 44            | 6             | 0           | 3.7484240               | -0.9915470 | -2.6425310 |
| 45            | 1             | 0           | 1.5885440               | -1.0521080 | -2.4293890 |
| 46            | 1             | 0           | 3.9739800               | -1.9007470 | -3.1927440 |

**Table S49.** Cartesian coordinates of the optimized structures of 3,2';5',3''-terthiophene antiparallel dimer using B97D/6-31+G(d,p) with counterpoise correction.

| Center number | Atomic number | Atomic type | Coordinates (Angstroms) |            |            |
|---------------|---------------|-------------|-------------------------|------------|------------|
|               |               |             | X                       | Y          | Z          |
| 1             | 6             | 0           | 0.0507320               | 2.4598260  | 1.1574320  |
| 2             | 6             | 0           | -1.3600570              | 2.3115830  | 1.1730600  |
| 3             | 1             | 0           | 0.6312360               | 2.8263350  | 2.0028130  |
| 4             | 6             | 0           | 0.6425100               | 2.0501110  | -0.0338740 |
| 5             | 6             | 0           | -1.8811310              | 1.7874250  | -0.0065560 |
| 6             | 1             | 0           | -1.9854340              | 2.5559050  | 2.0307030  |
| 7             | 16            | 0           | -0.5878830              | 1.4992500  | -1.1635310 |
| 8             | 6             | 0           | 2.0424480               | 2.0346840  | -0.4024840 |
| 9             | 6             | 0           | -3.2557330              | 1.4840060  | -0.3436580 |
| 10            | 6             | 0           | 2.6739370               | 1.3034610  | -1.4016070 |
| 11            | 16            | 0           | 3.2201480               | 3.0242340  | 0.4585990  |
| 12            | 6             | 0           | -3.7471560              | 0.6602690  | -1.3495490 |
| 13            | 16            | 0           | -4.5899820              | 2.1801670  | 0.5737300  |
| 14            | 6             | 0           | 4.0797320               | 1.5254090  | -1.4677890 |
| 15            | 1             | 0           | 2.1387140               | 0.5932690  | -2.0286040 |
| 16            | 6             | 0           | 4.5257740               | 2.4237370  | -0.5218380 |
| 17            | 6             | 0           | -5.1698660              | 0.5824680  | -1.3770980 |
| 18            | 1             | 0           | -3.0941860              | 0.1014000  | -2.0169420 |
| 19            | 6             | 0           | -5.7691170              | 1.3439490  | -0.3953440 |
| 20            | 1             | 0           | 4.7416560               | 1.0186210  | -2.1672920 |
| 21            | 1             | 0           | 5.5415980               | 2.7599080  | -0.3346160 |
| 22            | 1             | 0           | -5.7300060              | -0.0246760 | -2.0863520 |
| 23            | 1             | 0           | -6.8277210              | 1.4653350  | -0.1831000 |
| 24            | 1             | 0           | -5.5414960              | -2.7614100 | 0.3272940  |
| 25            | 6             | 0           | -4.5258590              | -2.4255950 | 0.5161480  |
| 26            | 6             | 0           | -4.0807930              | -1.5288680 | 1.4640640  |
| 27            | 16            | 0           | -3.2192230              | -3.0244740 | -0.4639510 |
| 28            | 6             | 0           | -2.6749230              | -1.3068790 | 1.3997550  |
| 29            | 1             | 0           | -4.7434740              | -1.0230930 | 2.1635810  |
| 30            | 6             | 0           | -2.0423960              | -2.0364240 | 0.4000470  |
| 31            | 1             | 0           | -2.1402660              | -0.5979960 | 2.0287250  |
| 32            | 6             | 0           | -0.6421110              | -2.0509680 | 0.0327540  |
| 33            | 6             | 0           | -0.0490270              | -2.4596050 | -1.1582750 |
| 34            | 16            | 0           | 0.5869030               | -1.4997780 | 1.1637320  |
| 35            | 6             | 0           | 1.3616770               | -2.3104440 | -1.1725650 |
| 36            | 1             | 0           | -0.6285230              | -2.8260450 | -2.0043770 |
| 37            | 6             | 0           | 1.8813760               | -1.7865440 | 0.0077660  |
| 38            | 1             | 0           | 1.9879730               | -2.5539810 | -2.0297630 |
| 39            | 6             | 0           | 3.2554920               | -1.4826210 | 0.3463330  |
| 40            | 6             | 0           | 3.7456130               | -0.6594850 | 1.3533670  |
| 41            | 16            | 0           | 4.5909080               | -2.1776620 | -0.5701700 |
| 42            | 6             | 0           | 5.1682780               | -0.5813300 | 1.3825020  |
| 43            | 1             | 0           | 3.0917860               | -0.1015700 | 2.0207270  |
| 44            | 6             | 0           | 5.7687760               | -1.3418950 | 0.4007920  |
| 45            | 1             | 0           | 5.7275300               | 0.0253350  | 2.0928710  |
| 46            | 1             | 0           | 6.8276350               | -1.4627180 | 0.1895080  |

**Table S50.** Cartesian coordinates of the optimized structures of  $\alpha$ -quaterthiophene parallel dimer using B97D/6-31+G(d,p) with counterpoise correction.

| Center number | Atomic number | Atomic type | Coordinates (Angstroms) |            |            |
|---------------|---------------|-------------|-------------------------|------------|------------|
|               |               |             | X                       | Y          | Z          |
| 1             | 6             | 0           | 7.5559820               | 1.7645370  | -0.2699960 |
| 2             | 6             | 0           | 7.0766780               | 2.3141020  | 0.9022310  |
| 3             | 16            | 0           | 6.2636840               | 1.2776280  | -1.3250780 |
| 4             | 1             | 0           | 8.5881060               | 1.6194500  | -0.5766430 |
| 5             | 6             | 0           | 5.6524640               | 2.3350880  | 0.9611780  |
| 6             | 1             | 0           | 7.7238510               | 2.6851790  | 1.6957780  |
| 7             | 6             | 0           | 5.0420130               | 1.7994910  | -0.1698620 |
| 8             | 1             | 0           | 5.0838770               | 2.7109060  | 1.8106780  |
| 9             | 6             | 0           | 3.6330840               | 1.6363860  | -0.4537320 |
| 10            | 6             | 0           | 3.0194780               | 0.8346230  | -1.4108570 |
| 11            | 16            | 0           | 2.4161100               | 2.5057980  | 0.4789670  |
| 12            | 6             | 0           | 1.6054400               | 0.8988230  | -1.3907640 |
| 13            | 1             | 0           | 3.5842050               | 0.1825020  | -2.0736860 |
| 14            | 6             | 0           | 1.0963590               | 1.7476480  | -0.4117000 |
| 15            | 1             | 0           | 0.9653820               | 0.2956800  | -2.0307460 |
| 16            | 6             | 0           | -0.2790740              | 2.0245140  | -0.0747250 |
| 17            | 6             | 0           | -0.7992170              | 2.6185680  | 1.0741440  |
| 18            | 16            | 0           | -1.5838480              | 1.5954800  | -1.1765980 |
| 19            | 6             | 0           | -2.2137930              | 2.6995200  | 1.0833830  |
| 20            | 1             | 0           | -0.1677730              | 2.9536970  | 1.8958170  |
| 21            | 6             | 0           | -2.8123940              | 2.1697860  | -0.0567250 |
| 22            | 1             | 0           | -2.7928900              | 3.1022020  | 1.9131860  |
| 23            | 6             | 0           | -4.2182650              | 2.0459330  | -0.3753660 |
| 24            | 6             | 0           | -4.8342470              | 1.1944450  | -1.2857390 |
| 25            | 16            | 0           | -5.4273030              | 3.0370580  | 0.4401580  |
| 26            | 6             | 0           | -6.2520870              | 1.3288000  | -1.3220630 |
| 27            | 1             | 0           | -4.2775250              | 0.4670030  | -1.8722040 |
| 28            | 6             | 0           | -6.7228190              | 2.2805830  | -0.4417140 |
| 29            | 1             | 0           | -6.9015490              | 0.7212670  | -1.9486790 |
| 30            | 1             | 0           | -7.7506460              | 2.5764990  | -0.2508590 |
| 31            | 1             | 0           | -0.9637190              | -0.2950910 | 2.0303260  |
| 32            | 6             | 0           | -1.6044300              | -0.8982530 | 1.3910190  |
| 33            | 6             | 0           | -1.0962300              | -1.7475190 | 0.4118840  |
| 34            | 6             | 0           | -3.0184570              | -0.8334910 | 1.4118880  |
| 35            | 6             | 0           | 0.2789250               | -2.0247150 | 0.0740660  |
| 36            | 16            | 0           | -2.4166930              | -2.5053760 | -0.4778440 |
| 37            | 6             | 0           | -3.6328690              | -1.6352580 | 0.4552630  |
| 38            | 1             | 0           | -3.5825530              | -0.1812710 | 2.0751700  |
| 39            | 16            | 0           | 1.5843050               | -1.5965650 | 1.1755020  |
| 40            | 6             | 0           | 0.7983560               | -2.6181330 | -1.0754510 |
| 41            | 6             | 0           | -5.0419270              | -1.7985060 | 0.1720990  |
| 42            | 6             | 0           | 2.8122170               | -2.1701030 | 0.0545240  |
| 43            | 6             | 0           | 2.2129450               | -2.6991280 | -1.0855580 |
| 44            | 1             | 0           | 0.1663930               | -2.9527790 | -1.8969210 |
| 45            | 6             | 0           | -5.6526370              | -2.3354990 | -0.9581520 |
| 46            | 16            | 0           | -6.2633340              | -1.2759950 | 1.3272740  |
| 47            | 6             | 0           | 4.2181850               | -2.0463800 | 0.3728140  |
| 48            | 1             | 0           | 2.7915170               | -3.1011870 | -1.9160330 |
| 49            | 6             | 0           | -7.0768220              | -2.3152240 | -0.8985860 |
| 50            | 1             | 0           | -5.0842330              | -2.7119600 | -1.8074910 |
| 51            | 6             | 0           | -7.5558760              | -1.7647330 | 0.2733120  |

|    |    |   |            |            |            |
|----|----|---|------------|------------|------------|
| 52 | 6  | 0 | 4.8340440  | -1.1960300 | 1.2843450  |
| 53 | 16 | 0 | 5.4273040  | -3.0367190 | -0.4434980 |
| 54 | 1  | 0 | -7.7241560 | -2.6876580 | -1.6913640 |
| 55 | 1  | 0 | -8.5879290 | -1.6198730 | 0.5803030  |
| 56 | 6  | 0 | 6.2518140  | -1.3308070 | 1.3211650  |
| 57 | 1  | 0 | 4.2772450  | -0.4687980 | 1.8709870  |
| 58 | 6  | 0 | 6.7226830  | -2.2815460 | 0.4397470  |
| 59 | 1  | 0 | 6.9011520  | -0.7243150 | 1.9489170  |
| 60 | 1  | 0 | 7.7505050  | -2.5775020 | 0.2489280  |

**Table S51.** Cartesian coordinates of the optimized structures of  $\alpha$ -quaterthiophene antiparallel dimer using B97D/6-31+G(d,p) with counterpoise correction.

| Center number | Atomic number | Atomic type | Coordinates (Angstroms) |            |            |
|---------------|---------------|-------------|-------------------------|------------|------------|
|               |               |             | X                       | Y          | Z          |
| 1             | 6             | 0           | 1.6949120               | 2.4293740  | -1.0558280 |
| 2             | 6             | 0           | 3.1109310               | 2.3795050  | -1.0377640 |
| 3             | 1             | 0           | 1.1133320               | 2.8094030  | -1.8944270 |
| 4             | 6             | 0           | 1.1008120               | 1.9054230  | 0.0913630  |
| 5             | 6             | 0           | 3.6379660               | 1.8194820  | 0.1232590  |
| 6             | 1             | 0           | 3.7397720               | 2.7205130  | -1.8590810 |
| 7             | 16            | 0           | 2.3395740               | 1.3683720  | 1.2218620  |
| 8             | 6             | 0           | -0.2997650              | 1.7680120  | 0.4089650  |
| 9             | 6             | 0           | 5.0215280               | 1.5980620  | 0.4836030  |
| 10            | 6             | 0           | -0.9010920              | 1.0113780  | 1.4109500  |
| 11            | 16            | 0           | -1.5310440              | 2.6031730  | -0.5380620 |
| 12            | 6             | 0           | 5.5490310               | 0.7370240  | 1.4390580  |
| 13            | 16            | 0           | 6.3205850               | 2.4720180  | -0.3262590 |
| 14            | 6             | 0           | -2.3150900              | 1.0764270  | 1.4057210  |
| 15            | 1             | 0           | -0.3272950              | 0.3861430  | 2.0921000  |
| 16            | 6             | 0           | -2.8368970              | 1.8800580  | 0.3977030  |
| 17            | 6             | 0           | 6.9715700               | 0.7716460  | 1.5123490  |
| 18            | 1             | 0           | 4.9245220               | 0.0752230  | 2.0356840  |
| 19            | 6             | 0           | 7.5348830               | 1.6568280  | 0.6166500  |
| 20            | 1             | 0           | -2.9483410              | 0.5078820  | 2.0835700  |
| 21            | 6             | 0           | -4.2203820              | 2.1291180  | 0.0569950  |
| 22            | 1             | 0           | 7.5586060               | 0.1549630  | 2.1908760  |
| 23            | 1             | 0           | 8.5858140               | 1.8783950  | 0.4527650  |
| 24            | 6             | 0           | -4.7532090              | 2.6437300  | -1.1223610 |
| 25            | 16            | 0           | -5.5146710              | 1.7600720  | 1.1927190  |
| 26            | 6             | 0           | -6.1758010              | 2.7340480  | -1.1118160 |
| 27            | 1             | 0           | -4.1313050              | 2.9285360  | -1.9699340 |
| 28            | 6             | 0           | -6.7311210              | 2.2875940  | 0.0703470  |
| 29            | 1             | 0           | -6.7680310              | 3.1020930  | -1.9482680 |
| 30            | 1             | 0           | -7.7802870              | 2.2277630  | 0.3453090  |
| 31            | 1             | 0           | 4.2032930               | -0.4043200 | -2.0631680 |
| 32            | 6             | 0           | 4.7950530               | -1.1037170 | -1.4762020 |
| 33            | 6             | 0           | 4.2240910               | -1.9455980 | -0.5286850 |
| 34            | 6             | 0           | 6.2144920               | -1.2021600 | -1.5433370 |
| 35            | 6             | 0           | 2.8310670               | -2.0913890 | -0.1669980 |
| 36            | 16            | 0           | 5.4778450               | -2.8851360 | 0.2795260  |

|    |    |   |            |            |            |
|----|----|---|------------|------------|------------|
| 37 | 6  | 0 | 6.7314870  | -2.1168860 | -0.6504280 |
| 38 | 1  | 0 | 6.8337790  | -0.6005820 | -2.2058560 |
| 39 | 6  | 0 | 2.2742520  | -2.6171260 | 0.9960440  |
| 40 | 16 | 0 | 1.5609650  | -1.5576830 | -1.2609380 |
| 41 | 1  | 0 | 7.7712120  | -2.3793700 | -0.4770300 |
| 42 | 6  | 0 | 0.8582770  | -2.5690050 | 1.0219540  |
| 43 | 1  | 0 | 2.8830150  | -2.9944010 | 1.8164410  |
| 44 | 6  | 0 | 0.2945930  | -2.0068880 | -0.1225670 |
| 45 | 1  | 0 | 0.2565420  | -2.9094070 | 1.8635120  |
| 46 | 6  | 0 | -1.0940950 | -1.7645860 | -0.4279950 |
| 47 | 6  | 0 | -1.6434390 | -0.9663850 | -1.4275510 |
| 48 | 16 | 0 | -2.3766110 | -2.4866490 | 0.5425090  |
| 49 | 6  | 0 | -3.0570500 | -0.9022900 | -1.3950550 |
| 50 | 1  | 0 | -1.0293870 | -0.3990300 | -2.1239200 |
| 51 | 6  | 0 | -3.6298920 | -1.6540700 | -0.3748350 |
| 52 | 1  | 0 | -3.6501610 | -0.2753630 | -2.0577360 |
| 53 | 6  | 0 | -5.0233200 | -1.7736810 | -0.0063390 |
| 54 | 6  | 0 | -5.5779640 | -2.2017420 | 1.1970760  |
| 55 | 16 | 0 | -6.2986100 | -1.3212330 | -1.1327620 |
| 56 | 6  | 0 | -7.0022810 | -2.1523350 | 1.2153260  |
| 57 | 1  | 0 | -4.9684960 | -2.5133980 | 2.0440310  |
| 58 | 6  | 0 | -7.5373420 | -1.6891960 | 0.0296700  |
| 59 | 1  | 0 | -7.6097370 | -2.4386170 | 2.0726710  |
| 60 | 1  | 0 | -8.5826100 | -1.5473080 | -0.2306840 |

---



## Section S3. Conformational analysis

Each conformer of the monomeric or dimeric oligothiophenes was named according to the examples shown in figure S28.

In the following tables  $E_{\text{rel}}(\text{intra})$  is the intramolecular relative energy between conformers as defined by figure 7 in the main article, i.e. the energy difference that arises solely from the relative configuration of all S atoms in each oligothiophene molecule;  $\Delta E_{\text{int}}(\text{dimer})$  is the self-association interaction energy calculated for each dimer as explained in the main article; and  $E_{\text{rel}}(\text{total}) = E_{\text{rel}}(\text{intra}) + \Delta E_{\text{int}}(\text{dimer})$ , is the total relative energy of the given conformer.

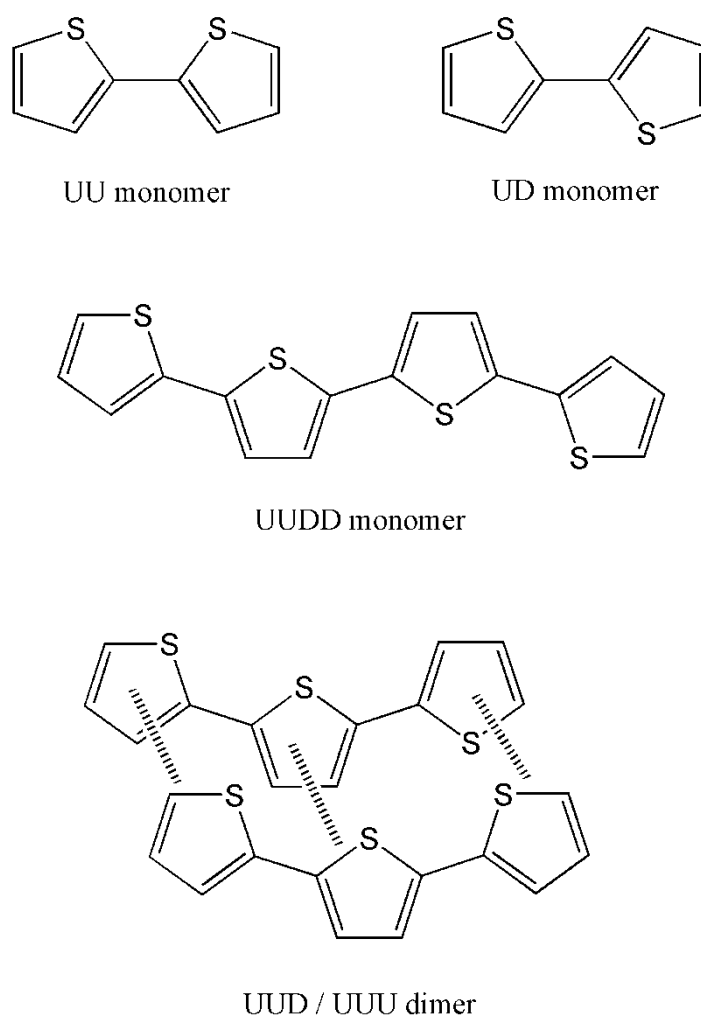

**Figure S28.** Some examples of conformer designation for the monomers and dimers of the oligothiophenes studied.

**Table S52.** Conformational analysis results for thiophene monomer.

| Monomer | $E_{\text{rel}}(\text{intra}) / \text{kJ}\cdot\text{mol}^{-1}$ | $p_i$ | $p_i \cdot \ln(p_i)$ |
|---------|----------------------------------------------------------------|-------|----------------------|
| U       | 0.0                                                            | 1.00  | 0.00                 |

**Table S53.** Conformational analysis results for thiophene dimer.

| Dimer | $E_{\text{rel}}(\text{intra})$<br>/ $\text{kJ}\cdot\text{mol}^{-1}$ | $\Delta E_{\text{int}}(\text{dimer})$<br>/ $\text{kJ}\cdot\text{mol}^{-1}$ | $E_{\text{rel}}(\text{total})$<br>/ $\text{kJ}\cdot\text{mol}^{-1}$ | $p_i$ | $p_i \cdot \ln(p_i)$ |
|-------|---------------------------------------------------------------------|----------------------------------------------------------------------------|---------------------------------------------------------------------|-------|----------------------|
| A     | 0                                                                   | -8.1                                                                       | -8.1                                                                | 0.05  | -0.15                |
| B     | 0                                                                   | -8.8                                                                       | -8.8                                                                | 0.07  | -0.18                |
| C     | 0                                                                   | -9.2                                                                       | -9.2                                                                | 0.08  | -0.20                |
| D     | 0                                                                   | -4.6                                                                       | -4.6                                                                | 0.01  | -0.05                |
| E     | 0                                                                   | -9.7                                                                       | -9.7                                                                | 0.10  | -0.22                |
| F     | 0                                                                   | -12.6                                                                      | -12.6                                                               | 0.31  | -0.36                |
| G     | 0                                                                   | -11.5                                                                      | -11.5                                                               | 0.20  | -0.32                |
| H     | 0                                                                   | -11.4                                                                      | -11.4                                                               | 0.19  | -0.32                |

**Table S54.** Conformational analysis results for the thermodynamics of self-association of thiophene.

|                                                                      | monomer | dimer  | Self-association reaction                                                               |        |
|----------------------------------------------------------------------|---------|--------|-----------------------------------------------------------------------------------------|--------|
| $H_m / \text{kJ}\cdot\text{mol}^{-1}$                                | 0.00    | -11.02 | $\Delta_{\text{ass}}H_m / \text{kJ}\cdot\text{mol}^{-1}$                                | -11.02 |
| $S_{m,\text{conf}} / \text{J}\cdot\text{K}^{-1}\cdot\text{mol}^{-1}$ | 0.00    | 15.03  | $\Delta_{\text{ass}}S_{m,\text{conf}} / \text{J}\cdot\text{K}^{-1}\cdot\text{mol}^{-1}$ | 15.03  |

**Table S55.** Conformational analysis results for 22-BT monomer.

| Monomer | $E_{\text{rel}}(\text{intra})$<br>/ $\text{kJ}\cdot\text{mol}^{-1}$ | $p_i$ | $p_i \cdot \ln(p_i)$ |
|---------|---------------------------------------------------------------------|-------|----------------------|
| UU      | 1.6                                                                 | 0.34  | -0.37                |
| UD      | 0.0                                                                 | 0.66  | -0.28                |

**Table S56.** Conformational analysis results for 22-BT dimer.

| Dimer | $E_{\text{rel}}(\text{intra})$<br>/ $\text{kJ}\cdot\text{mol}^{-1}$ | $\Delta E_{\text{int}}(\text{dimer})$<br>/ $\text{kJ}\cdot\text{mol}^{-1}$ | $E_{\text{rel}}(\text{total})$<br>/ $\text{kJ}\cdot\text{mol}^{-1}$ | $p_i$ | $p_i \cdot \ln(p_i)$ |       |
|-------|---------------------------------------------------------------------|----------------------------------------------------------------------------|---------------------------------------------------------------------|-------|----------------------|-------|
| UU /  | UU                                                                  | 3.2                                                                        | -26.0                                                               | -22.8 | 0.09                 | -0.21 |
|       | UD                                                                  | 1.6                                                                        | -26.0                                                               | -24.4 | 0.17                 | -0.30 |
|       | DD                                                                  | 3.2                                                                        | -26.0                                                               | -22.8 | 0.09                 | -0.21 |
| UD /  | UD                                                                  | 0.0                                                                        | -26.0                                                               | -26.0 | 0.33                 | -0.37 |
|       | DU                                                                  | 0.0                                                                        | -26.0                                                               | -26.0 | 0.33                 | -0.37 |

**Table S57.** Conformational analysis results for the thermodynamics of self-association of 22-BT.

|                                                                      | monomer | dimer  | Self-association reaction                                                               |        |
|----------------------------------------------------------------------|---------|--------|-----------------------------------------------------------------------------------------|--------|
| $H_m / \text{kJ}\cdot\text{mol}^{-1}$                                | 0.55    | -25.16 | $\Delta_{\text{ass}}H_m / \text{kJ}\cdot\text{mol}^{-1}$                                | -26.26 |
| $S_{m,\text{conf}} / \text{J}\cdot\text{K}^{-1}\cdot\text{mol}^{-1}$ | 5.34    | 12.15  | $\Delta_{\text{ass}}S_{m,\text{conf}} / \text{J}\cdot\text{K}^{-1}\cdot\text{mol}^{-1}$ | 1.46   |

**Table S58.** Conformational analysis results for 2252-TT monomer.

| Monomer | $E_{\text{rel}}(\text{intra})$<br>/ $\text{kJ}\cdot\text{mol}^{-1}$ | $p_i$ | $p_i\cdot\ln(p_i)$ |
|---------|---------------------------------------------------------------------|-------|--------------------|
| UUU     | 3.2                                                                 | 0.15  | -0.29              |
| UUD     | 1.6                                                                 | 0.29  | -0.36              |
| UDU     | 0.0                                                                 | 0.56  | -0.33              |

**Table S59.** Conformational analysis results for 2252-TT dimer.

| Dimer | $E_{\text{rel}}(\text{intra})$<br>/ $\text{kJ}\cdot\text{mol}^{-1}$ | $\Delta E_{\text{int}}(\text{dimer})$<br>/ $\text{kJ}\cdot\text{mol}^{-1}$ | $E_{\text{rel}}(\text{total})$<br>/ $\text{kJ}\cdot\text{mol}^{-1}$ | $p_i$ | $p_i\cdot\ln(p_i)$ |       |
|-------|---------------------------------------------------------------------|----------------------------------------------------------------------------|---------------------------------------------------------------------|-------|--------------------|-------|
| UUU / | UUU                                                                 | 6.4                                                                        | -40.0                                                               | -33.6 | 0.01               | -0.06 |
|       | UUD                                                                 | 4.8                                                                        | -40.0                                                               | -35.2 | 0.03               | -0.10 |
|       | UDD                                                                 | 4.8                                                                        | -40.0                                                               | -35.2 | 0.03               | -0.10 |
|       | UDU                                                                 | 3.2                                                                        | -40.0                                                               | -36.8 | 0.05               | -0.16 |
|       | DUD                                                                 | 3.2                                                                        | -40.0                                                               | -36.8 | 0.05               | -0.16 |
|       | DDD                                                                 | 6.4                                                                        | -40.0                                                               | -33.6 | 0.01               | -0.06 |
| UUD / | UUD                                                                 | 3.2                                                                        | -40.0                                                               | -36.8 | 0.05               | -0.16 |
|       | UDD                                                                 | 3.2                                                                        | -40.0                                                               | -36.8 | 0.05               | -0.16 |
|       | UDU                                                                 | 1.6                                                                        | -40.0                                                               | -38.4 | 0.10               | -0.23 |
|       | DDU                                                                 | 3.2                                                                        | -40.0                                                               | -36.8 | 0.05               | -0.16 |
|       | DUU                                                                 | 3.2                                                                        | -40.0                                                               | -36.8 | 0.05               | -0.16 |
|       | DUD                                                                 | 1.6                                                                        | -40.0                                                               | -38.4 | 0.10               | -0.23 |
| UDU / | UDU                                                                 | 0.0                                                                        | -40.0                                                               | -40.0 | 0.20               | -0.32 |
|       | DUD                                                                 | 0.0                                                                        | -40.0                                                               | -40.0 | 0.20               | -0.32 |

**Table S60.** Conformational analysis results for the thermodynamics of self-association of 2252-TT.

|                                                                      | monomer | dimer  | Self-association reaction                                                               |        |
|----------------------------------------------------------------------|---------|--------|-----------------------------------------------------------------------------------------|--------|
| $H_m / \text{kJ}\cdot\text{mol}^{-1}$                                | 0.95    | -38.20 | $\Delta_{\text{ass}}H_m / \text{kJ}\cdot\text{mol}^{-1}$                                | -40.10 |
| $S_{m,\text{conf}} / \text{J}\cdot\text{K}^{-1}\cdot\text{mol}^{-1}$ | 8.07    | 19.64  | $\Delta_{\text{ass}}S_{m,\text{conf}} / \text{J}\cdot\text{K}^{-1}\cdot\text{mol}^{-1}$ | 3.51   |

**Table S61.** Conformational analysis results for  $\alpha$ -quaterthiophene monomer.

| Monomer | $E_{\text{rel}}(\text{intra})$<br>/ $\text{kJ}\cdot\text{mol}^{-1}$ | $p_i$ | $p_i\cdot\ln(p_i)$ |
|---------|---------------------------------------------------------------------|-------|--------------------|
| UUUU    | 4.8                                                                 | 0.05  | -0.15              |
| UUUD    | 3.2                                                                 | 0.10  | -0.23              |
| UUDD    | 3.2                                                                 | 0.10  | -0.23              |
| UUDU    | 1.6                                                                 | 0.19  | -0.32              |
| UDDU    | 1.6                                                                 | 0.19  | -0.32              |
| UDUD    | 0.0                                                                 | 0.37  | -0.37              |

**Table S62.** Conformational analysis results for  $\alpha$ -quaterthiophene dimer.

| Dimer  | $E_{\text{rel}}(\text{intra})$<br>/ $\text{kJ}\cdot\text{mol}^{-1}$ | $\Delta E_{\text{int}}(\text{dimer})$<br>/ $\text{kJ}\cdot\text{mol}^{-1}$ | $E_{\text{rel}}(\text{total})$<br>/ $\text{kJ}\cdot\text{mol}^{-1}$ | $p_i$ | $p_i \cdot \ln(p_i)$ |       |
|--------|---------------------------------------------------------------------|----------------------------------------------------------------------------|---------------------------------------------------------------------|-------|----------------------|-------|
| UUUU / | UUUU                                                                | 9.6                                                                        | -55.0                                                               | -45.4 | 0.00                 | -0.02 |
|        | UUUD                                                                | 8.0                                                                        | -55.0                                                               | -47.0 | 0.01                 | -0.03 |
|        | UUDD                                                                | 8.0                                                                        | -40.0                                                               | -32.0 | 0.00                 | 0.00  |
|        | UDDD                                                                | 8.0                                                                        | -40.0                                                               | -32.0 | 0.00                 | 0.00  |
|        | DDDD                                                                | 9.6                                                                        | -40.0                                                               | -30.4 | 0.00                 | 0.00  |
|        | DUUD                                                                | 6.4                                                                        | -55.0                                                               | -48.6 | 0.01                 | -0.05 |
|        | DUDD                                                                | 6.4                                                                        | -40.0                                                               | -33.6 | 0.00                 | 0.00  |
|        | DUDU                                                                | 4.8                                                                        | -40.0                                                               | -35.2 | 0.00                 | 0.00  |
|        | UDDU                                                                | 6.4                                                                        | -40.0                                                               | -33.6 | 0.00                 | 0.00  |
|        | UDUU                                                                | 6.4                                                                        | -55.0                                                               | -48.6 | 0.01                 | -0.05 |
| UUUD / | UUUD                                                                | 6.4                                                                        | -55.0                                                               | -48.6 | 0.01                 | -0.05 |
|        | UUDD                                                                | 6.4                                                                        | -40.0                                                               | -33.6 | 0.00                 | 0.00  |
|        | UDDD                                                                | 6.4                                                                        | -40.0                                                               | -33.6 | 0.00                 | 0.00  |
|        | DDDU                                                                | 6.4                                                                        | -40.0                                                               | -33.6 | 0.00                 | 0.00  |
|        | DDUU                                                                | 6.4                                                                        | -55.0                                                               | -48.6 | 0.01                 | -0.05 |
|        | DUUU                                                                | 6.4                                                                        | -55.0                                                               | -48.6 | 0.01                 | -0.05 |
|        | DUUD                                                                | 4.8                                                                        | -55.0                                                               | -50.2 | 0.02                 | -0.09 |
|        | DUDD                                                                | 4.8                                                                        | -40.0                                                               | -35.2 | 0.00                 | 0.00  |
|        | DUDU                                                                | 3.2                                                                        | -40.0                                                               | -36.8 | 0.00                 | 0.00  |
|        | UDDU                                                                | 4.8                                                                        | -40.0                                                               | -35.2 | 0.00                 | 0.00  |
|        | UDUU                                                                | 4.8                                                                        | -40.0                                                               | -35.2 | 0.00                 | 0.00  |
|        | UDUD                                                                | 3.2                                                                        | -40.0                                                               | -36.8 | 0.00                 | 0.00  |
|        | DDUD                                                                | 4.8                                                                        | -40.0                                                               | -35.2 | 0.00                 | 0.00  |
|        | UUDU                                                                | 4.8                                                                        | -40.0                                                               | -35.2 | 0.00                 | 0.00  |
| UUDD / | UUDD                                                                | 6.4                                                                        | -55.0                                                               | -48.6 | 0.01                 | -0.05 |
|        | DDUU                                                                | 6.4                                                                        | -55.0                                                               | -48.6 | 0.01                 | -0.05 |
|        | DUUD                                                                | 4.8                                                                        | -40.0                                                               | -35.2 | 0.00                 | 0.00  |
|        | DUDD                                                                | 4.8                                                                        | -55.0                                                               | -50.2 | 0.02                 | -0.09 |
|        | DUDU                                                                | 3.2                                                                        | -55.0                                                               | -51.8 | 0.05                 | -0.14 |
|        | UDUU                                                                | 4.8                                                                        | -55.0                                                               | -50.2 | 0.02                 | -0.09 |
|        | UDUD                                                                | 3.2                                                                        | -55.0                                                               | -51.8 | 0.05                 | -0.14 |
| UUDU / | DUUD                                                                | 3.2                                                                        | -40.0                                                               | -36.8 | 0.00                 | 0.00  |
|        | DUDD                                                                | 3.2                                                                        | -55.0                                                               | -51.8 | 0.05                 | -0.14 |
|        | DUDU                                                                | 1.6                                                                        | -55.0                                                               | -53.4 | 0.09                 | -0.21 |
|        | UDDU                                                                | 3.2                                                                        | -40.0                                                               | -36.8 | 0.00                 | 0.00  |
|        | UDUU                                                                | 3.2                                                                        | -55.0                                                               | -51.8 | 0.05                 | -0.14 |
|        | UDUD                                                                | 1.6                                                                        | -55.0                                                               | -53.4 | 0.09                 | -0.21 |
|        | DDUD                                                                | 3.2                                                                        | -55.0                                                               | -51.8 | 0.05                 | -0.14 |
|        | UUDU                                                                | 3.2                                                                        | -55.0                                                               | -51.8 | 0.05                 | -0.14 |
| UDDU / | DUUD                                                                | 3.2                                                                        | -40.0                                                               | -36.8 | 0.00                 | 0.00  |
|        | DUDU                                                                | 1.6                                                                        | -40.0                                                               | -38.4 | 0.00                 | 0.00  |
|        | UDDU                                                                | 3.2                                                                        | -55.0                                                               | -51.8 | 0.05                 | -0.14 |
| UDUD / | DUDU                                                                | 0.0                                                                        | -55.0                                                               | -55.0 | 0.17                 | -0.30 |
|        | UDUD                                                                | 0.0                                                                        | -55.0                                                               | -55.0 | 0.17                 | -0.30 |

**Table S63.** Conformational analysis results for the thermodynamics of self-association of  $\alpha$ -quaterthiophene.

|                                                                      | monomer | dimer  | Self-association reaction                                                               |        |
|----------------------------------------------------------------------|---------|--------|-----------------------------------------------------------------------------------------|--------|
| $H_m / \text{kJ}\cdot\text{mol}^{-1}$                                | 1.50    | -52.69 | $\Delta_{\text{ass}}H_m / \text{kJ}\cdot\text{mol}^{-1}$                                | -55.69 |
| $S_{m,\text{conf}} / \text{J}\cdot\text{K}^{-1}\cdot\text{mol}^{-1}$ | 13.41   | 22.64  | $\Delta_{\text{ass}}S_{m,\text{conf}} / \text{J}\cdot\text{K}^{-1}\cdot\text{mol}^{-1}$ | -4.18  |
